# Supplementary material for: Talaromyces neofusisporus and T. qii, two new species of section Talaromyces isolated from plant leaves in Tibet, China
Source: PubMed Central journal article supplement (PMC4698637; doi:10.1038/srep18622), 2016-01-04
Supplement: srep18622-s1.pdf [file srep18622-s1.pdf]

***Talaromyces fusisporus* and *T. qii*, two new species of section *Talaromyces* isolated from plant leaves in Tibet, China**

Qi-Ming Wang, Yong-Hong Zhang, Bo Wang, Long Wang

Figure S1. ML phylogram inferred from the combined *CaM*, *BenA* and *ITS1-5.8S-ITS2* sequences. Bootstrap percentages over 70% derived from 1000 replicates are indicated at the nodes. Bar = 0.05 substitutions per nucleotide position.

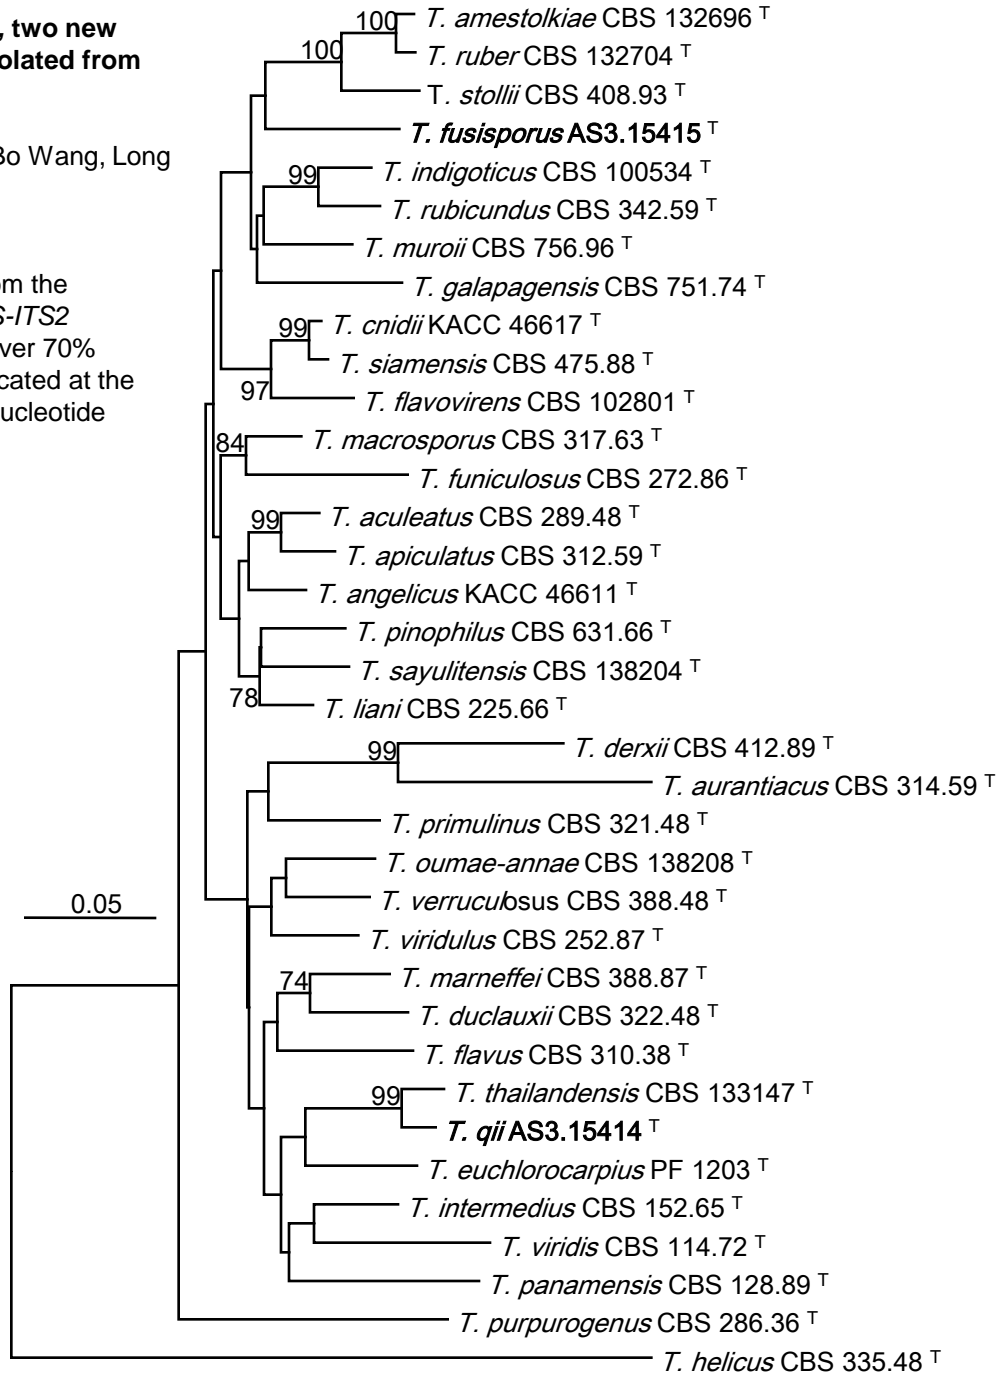

## Supplementary dataset 1

>KF741975\_Talaromyces\_acleatus\_ CBS 289.48 cmd

TG-GATATCTAT-TTGT--C-----GCAATGTTG---TGG-TGG--GTGGTTAGCTGACTA---CGGTTTGATG-AGTAGGACA  
AGGATGGAGATGGTGAG---TCCGC-----CACGAA-C-AATAAC-----CAAA-AGACCTTGACC-GAAG-----GTGATCG  
C-----AACGG-----ACAA-ATATTG-----ATAAAATT-GAA-----TAGGCCAAATCACAACCAAGGAACTGGGCA  
CCGTCATGCGCTCTCTCGGCCAGAACCCCTCCGAATCCGAATTGCAGGACATGATCAACGAAGTCGACGCTGAC  
AACAACGGCACAATCGATTCCCTGGTATGCTATAAA-----TCCT--TACGGGTTATTACG-----ATGGC---G  
G-TACTAACTGC--T---G-CAGAATTCTTGACAATGATGGCCGCAAAATGAAGGATACCGACTCCGAGGAAGAGAT  
CCGCGAGGCTTTCAAGGTGTTTGACCGTGACAACAATG

>KF741937\_Talaromyces\_amestolkiae CBS 132696

TG-GAAACTTGGTTTGT--C-----ACAATGTTG-----GC--GTGGTTAGCTGACCAG-CCGTTTTGATG-AATAGGACA  
AGGATGGAGATGGTGAG---TCGC-----CGCGAA-C-AATAA-----ACACCTTGAAC-GAAC-----GTTACCGC---  
---AGCCA-----ACAG-ACATTG-----ACCCTATC-GGA-----CAGGACAAATCACAACCAAGGAACTCGGCACA  
GTCATGCGTTCTCTCGGCCAGAACCCCTCCGAATCCGAATTGCAGGACATGATCAACGAAGTCGACGCTGACAA  
CAACGGCACAATTGATTTCCCTGGTATGACTGACCACC-----AACT--CGCAATATTTG-----ATGGC---AG-  
TACTGACTGC--C---G-CAGAATTCTTGACAATGATGGCCGCAAAATGAAGGATACCGACTCCGAGGAAGAGATC  
CGTGAGGCTTTCAAGGTGTTTGATCGTGACAACAATG

>KJ885259\_Talaromyces\_angelicus KACC 46611

TG-GATTTCCAC-TTGT--C-----GTAATGGTG-----G--GTGGTTAGCTGACTAG--CGTTTTGATG-AGTAGGACAAG  
GATGGAGATGGTGAG---TCCGC-----CACGAA-C-GATAAC-----CAAA-AGACCTTGAAC-AAAG-----GTTATCGC---  
---TACGA-----ACAG-ATATTG-----ACTATATC-GAA-----TAGGCCAAATCAGACCAAGGAACTGGGCACCG  
TCATGCGTTCCCTCGGCCAGAACCCCTCCGAATCCGAATTGCAGGACATGATCAACGAAGTCGACGCTGACAAC  
AACGGCACAATCGATTTCCCTGGTATGATATAAT-----TGCT--TACGGTTTACTACG-----ATGGC---AG-TAC  
TAACTGC--C---G-CAGAATTCTTGACAATGATGGCCGCAAAATGAAGGATACCGACTCCGAGGAAGAGATCCGC  
GAGGCTTTCAAGGTGTTTGACCGCGACAACAATG

>KF741950\_Talaromyces\_apiculatus CBS 312.59

TG-GATATCTAT-TTGT--C-----GCAATGTTG---CCG-TGG--GTGGTTAGCTGACTAG--CGGCTTGATG-AGTAGGAC  
AAGGATGGAGATGGTGAG---TCCGC-----CATGAA-C-AATAAC-----CAAG-AGACCTTGAAC-ATAG-----GTGATCG  
C-----AACGA-----ACAA-GTATTG-----ATAAAATC-GAA-----TAGGCCAAATCACAACCAAGGAACTGGGCA  
CCGTCATGCGTTCTCTCGGCCAGAACCCCTCCGAATCCGAATTACAGGACATGATCAATGAGGTCGACGCTGACA  
ACAACGGCACAATCGATTTCCCTGGTATGATATAAT-----TGCT--TACGGGTTATTACG-----ACGGC---AG-  
TGCTAACTGC--C---G-CAGAATTCTTGACAATGATGGCCGCAAAATGAAGGATACCGACTCCGAGGAAGAGATC  
CGCGAGGCTTTCAAGGTGTTTGACCGTGACAACAATG

>KF741951\_Talaromyces\_aurantiacus CBS 314.59

TGAAATATCTTC-CTGTCGC-----ATAGTATTT-----T---CTCGTT-GCTTACAGA-ATGTTTTAATGAAATAGGACAAG  
GATGGAGATGGTGAGTG-ACGAC-----TGCGACAC-ACCAAC-----GATGTCGTATCGAAAGCAGATTCATCTACGA  
TC-----TACGA-----ATAA-ATATTG-----ATAGAGTC-GGA-----CAGGTCAAATCACAACCAAGGAACTGGG  
CACCCTCATGCGTTCCCTCGGCCAGAACCCCTCCGAATCCGAATTGCAAGACATGATCAACGAAGTTGACGCTG  
ACAACAACGGCACAATTGATTTCCCTGGTACGAT-CATCACGCCGCAACCTGCTTTCA-----ATGGA  
---AA-ACTGACCGC--C---G-CAGAATTCTTGACCATGATGGCCGCAAAATGAAGGATACCGACTCCGAGGAAGA  
GATCCGCGAGGCTTTCAAGGTGTTTGACCGCGACAACAACG

>KJ885266\_Talaromyces\_cnidii KACC 46617

TG-ACTTTCTAC-TTAT--C-----GCAATGTTG---TGG-T-G--GTGGTTAGCTGACTAG-CCGTTTTGATG-AATAGGACA  
AGGATGGAGATGGTGAG---TCGCCACGAACACAAA-C-AACAAC-----CAAA-CGACTTTGAAC-AAAG-----GCTAT

CA-----ACGG-----ACAG-TTATTG-----ACTCTATC-GAA-----TAGGTCAAATCACAACCAAGGAAGTGGGC  
ACCGTCATGCGTTCCCTCGGCCAGAACCCCTCCGAATCCGAATTGCAGGACATGATCAACGAGGTGACGCTGA  
CAACAACGGCACAATCGATTTCCCTGGTATGACAAAGCGCACTAC-CACT--CGCAATATCAC-----ATGG  
C---AG-TACTAACTGC--C---G-CAGAATTCCTGACAATGATGGCCCGCAAATGAAGGATACCGACTCCGAGGAAG  
AGATCCGCGAGGCCTTCAAGGTGTTTGACCGTGACAACAATG

>KF741959\_Talaromyces\_derxii CBS 412.89

TG-----CAGG-CTGT-C-----GCATTTTT---TTG-TGGTTGAGGTCA-CTAACCGG--TCTTTTAATG-AACAGGACAAG  
GATGGAGATGGTGAAGTACCAG-----TACGGCAT-GCCGAC-----GAATATTGTCTCGAATAAAAG-----CTTGAATG  
-----TACGG-----GCAG-ATACTG-----ATAGACTC-GAA-----CAGGTCAAGTCACTACCAAGGAAGTGGGCA  
CCGTCATGCGTTCCCTCGGCCAGAACCCCTCCGAATCCGAGTTGCAGGACATGATCAACGAAGTGCAGCTGAC  
AACAACGGCACAATGATTTCCCTGGTACGATTCATCACTCTAGATGGT--GACA-----TCGACGATA  
AAAAGTACAGC--C---A-CAGAATTCCTGACCATGATGGCCCGCAAATGAAGGATACCGACTCCGAGGAAGAGA  
TCCGCGAGGCTTTCAAGGTGTTTGACCGCGACAACAACG

>KF741955\_Talaromyces\_duclauxii CBS 322.48

TG-GATTCCGGG-TTGT-C-----GCAATGTTG--TGG-TGG--GTGGTTAGCTGACTAG-CCGTTTTGATG-AATAGGA  
CAAAGACGGAGATGGTGAAGTGA--CGC----CACGAA-C-ACCAAC-----GATATACTCTTGAAC-AAAG-----GCTAT  
TGC-----TGCGA-----ACAA-ATATTG-----ATTATGCC--AA-----CAGGTCAAATCACAACCAAGGAAGTGGG  
CACCGTCATGCGTTCCCTCGGCCAGAACCCCTCCGAATCCGAATTGCAGGACATGATCAACGAGGTGATGCTG  
ACAACAACGGCACAATCGATTTCCCTGGTATGATACAGCTTC----TACTTACCGCAACTGTTTCCGATCGCA-----  
-AGCGC--AGATACTGACCGT-C---G-TAGAATTCTTGACAATGATGGCTCGCAAATGAAGGATACCGACTCTGAG  
GAAGAGATCCGCGAGGCTTTCAAGGTGTTTGACCGCGACAACAATG

>KJ885271\_Talaromyces\_euchlorocarpus PF 1203

TGAGATACCCGG-TTGTGCG-----GCAATGTTATGTTGG-TGG--GTGGTTATCTAACTAG-CCGTTTTGATG-AATAG  
GACAAGGATGGAGATGGTGAAGTATCCGC----CACGAA-C-ACCAGC-----GACATGGTCTTTAGAACGAGG-----  
CTATACAGAATAGATACACGG-----ACAGCATGTTG-----ATTATATC-GAA-----TAGGTCAAATCACAACCAAG  
GAACTGGGCACCGTCATGCGTTCCCTCGGCCAGAACCCCTCCGAATCCGAATTGCAGGACATGATCAACGAGGT  
CGACGCTGACAACAACGGCACAATCGATTTCCCTGGTATGATACCAGCACGTCTGCGCTGAATAGATACG-----  
-----GTGGC--GG-GACTAACTGC--C---TATAGAATTCTTGACAATGATGGCCCGCAAATGAAGGATACCGACT  
CCGAGGAAGAGATCCGCGAGGCCTTCAAGGTGTTTGACCGCGACAACAATG

>KF741933\_Talaromyces\_flavovirens CBS 102801

TG-GCTATCTAC-TTAT-C-----GCAATGTTG--TGG--GA--GTGATTAGCTGACTAG-CCCCTTTGATG-AGTAGGACA  
AGGACGGAGATGGTGAAG--TCGCCACGAACACGGA-C-AACAAC-----CAA-AGATTCTCAAT-AAAG-----GCTAT  
CG-----ACGA-----ATAA-ATGTTG-----ACTTTATT-GAA-----TAGGTCAAATCACAACCAAGGAAGTGGGC  
ACCGTCATGCGTTCTCTCGGCCAGAACCCCTCCGAATCCGAATTGCAGGACATGATCAACGAAGTGCAGCTGA  
CAACAACGGCACAATCGATTTCCCTGGTATGACAAAGCACACTAT-CACG---T-CAATATTCC-----ATGGC-  
--AG-TACTAACTGC--C---G-CAGAATTCCTGACAATGATGGCCCGCAAATGAAGGATACCGACTCCGAGGAAGAG  
ATCCGCGAGGCTTTCAAGGTGTTTGACCGCGACAACAATG

>KF741949\_Talaromyces\_flavus CBS 310.38

TG-GATTTCCGG-TTGT-C-----GCAATGTTG--TGG-TGG--GTGGTTAGCTGACTAG-CCGTTTGGATG-AGTAGGA  
CAAGGATGGAGATGGTGAAGTGAAC-----CACGAA-C-ACCAAC-----GATA-CAGCAACGAAT-AAGTACTGTGCTT  
ATGAT-----TGCGA-----GCAAATTATTG-----ACGGGGACTGAA-----CAGGTCAAATCACAACCAAGGAAGT  
GGGCACCGTCATGCGTTCCCTCGGCCAGAACCCCTCCGAATCCGAATTGCAGGACATGATCAACGAAGTGCAGC  
CTGACAACAACGGCACAATCGATTTCCCTGGTATGGCCAAAC-----CTGTCTACGGTTATTACA-----AT  
GGC--AG-AACTAACTGC--C---AACAGAATTCTTGACAATGATGGCCCGCAAATGAAGGATACCGATTCCGAGGA

AGAGATCCGCGAGGCTTTCAAGGTGTTTGACCGTGATAACAATG

>KF741945\_Talaromyces\_funiculosus CBS 272.86

TG-GATTCCCGG-TTGT--C-----GCAATGTTA--TG-----GTGGTTAGCTGACTAG-CCGTTGAAATA-ATTAGGACAA  
GGATGGAGATGGTGAG---TCCGC-----CACGAA-T-GATAAC-----CAGA-TGATCTTGAGC-AAAG-----TTTATCGC--  
-----ATCGA-----ATAT-ATATTA-----ACTATATT-CAA-----AAGGCCAAATCACAACCAAGGAACTGGGCACTGT  
CATGCGTTCCCTCGGCCAGAACCCCTCCGAATCCGAATTGCAGGACATGATCAATGAAGTGCATGCTGACAACAA  
CGGAACAATCGATTTCCCTGGTATGACAACTGCA----AACT---CTCAGTTTTCT-----ACCAC---AG-TACT  
AACTAA--C----A-CAGAATTCTTGACTATGATGGCCCGCAAATGAAGGATACTGACTCCGAGGAAGAGATCCGTGA  
GGCTTTCAAGGTGTTTGACCGTGACAACAATG

>KF741966\_Talaromyces\_galapagensis CBS 751.74

TG-GATTTCTGG-TTGT--C-----GCATTGTTT--TGG-TGG--CTGGTTAGCTGACTAG--CGTTTTGATG-AGTAGGACA  
AGGATGGTGATGGTGAG---TCCGC-----CACGAA-C-A-CGAT-----GATA-TCGTCTCGAAC-AAAG-----GTTGTTTC-  
-----ACGA-----ACAG-ATATTG-----ATAAACTC-CAA-----TAGGCCAAATCACAACCAAGGAATTGGGCACT  
GTCATGCGTTCCCTCGGTCAGAACCCCTCCGAATCTGAATTGCAGGACATGATCAACGAAGTGCACGCTGACAA  
CAACGGCACAATTGATTTCCCTGGTATGACAAACCACA----AGCT---CGCGATTTTT-----ATGGCGATAC  
TTACTAACTGC--C----G-CAGAATTCTTGACGATGATGGCCCGTAAATGAAGGATACCGACTCCGAGGAAGAGATC  
CGTGAGGCATTCAAGGTGTTTGACCGTGACAACAATG

>KF741931\_Talaromyces\_indigoticus CBS 100534

TG-GATTCCTGG-TTGT--C-----GCAATGTTG--TGG-TGG--GTGGTTAGCTGACTAG--CGTTTTGATG-AGTAGGAC  
AAGGATGGTGATGGTGAG---TTCGC-----CACGAA-C-AACGAC-----CAAA-AGACCTTGAAC-AAAG-----GTCATT  
GC-----TACGA-----ACAG-ATATTG-----ACTATATC-GAA-----TAGGTCAAATTACGACCAAGGAATTGGGCA  
CCGTCATGCGTTCCCTCGGCCAGAACCCCTCCGAATCCGAATTGCAGGACATGATCAACGAAGTGCACGCTGAC  
AACAACGGCACAATTGATTTCCCTGGTATGACGAACCACACCAC-CACT---CGCAATATTAC-----ATAGC-  
--AG-TACTAACTGC--T----A-CAGAATTCTTGACAATGATGGCTCGCAAATGAAGGATACCGACTCCGAGGAAGAGA  
TCCGCGAGGCTTTCAAGGTGTTTGACCGTGACAACAATG

>KJ885290\_Talaromyces\_intermedius CBS 152.65

TG-GATTCCTAG-TTGT--C-----GCAATGTTATGCTGG-TGG--GTGGCTAGCTGATTAG-CCGTTTTGATG-AGTAGG  
ACAAGGATGGAGATGGTGAGTGATCCGC-----CTCGAC-C-ACCGAC-----GAGATAGTCTTGAAC-AAAG-----GC  
TTTTGT-----TCCGATGTGGACAGCATATTG-----ACTATATCGGAA-----TAGGTCAAATTACAACCAAGGAG  
CTCGGCACCGTCATGCGTTCCCTCGGCCAGAACCCCTCCGAATCCGAATTGCAGGACATGATCAACGAAGTGCAG  
CGCTGACAACAACGGCACAATTGATTTCCCTGGTATGACACACTACA-----ACT---CGCAATCGTCT-----A  
TGGC---AGTTGCTAACTGCTAC----A-CAGAATTCTTAACAATGATGGCCCGCAAATGAAGGATACCGACTCCGAG  
GAAGAGATCCGGGAGGCTTTCAAGGTGTTTGACCGTGACAACAATG

>KJ885257\_Talaromyces\_liani CBS 225.66

TA-GCAATCTGG-TTGT--C-----GCAATGTTG--TGG-TGG--GTGGTTAGCTGACTAG-CCGTTTTGATG-AGTAGGA  
CAAGGATGGAGATGGTGAG---TCGGC-----CACGAA-C-AATATC-----CAAA-AGGCGTTGAAC-AAGG-----GTTAT  
CGC-----CGCGA-----ACAG-ATATTG-----ACTATATC-GAA-----TAGGTCAAATCACAACCAAGGAACTGGG  
CACTGTCATGCGTTCCCTCGGCCAGAACCCCTCCGAATCCGAATGCAGGACATGATCAACGAAGTGCACGCTG  
ACAACAACGGCACAATCGATTTCCCTGGTATGATATAAT-----TGCT---CACAGGATATTACG-----ATGGC---  
AG-TACTAACTGC--C----G-CAGAATCCTGACAATGATGGCCCGCAAATGAAGGACACCGACTCCGAGGAAGAG  
ATCCGCGAGGCATTCAAGGTGTTTGACCGTGACAACAATG

>KF741952\_Talaromyces\_macrosporus CBS 317.63

TG-GATTCCTGG-TTGT--C-----GCAATGT-----G--GTGATTCGCTGACTAG-CCG-TTTGATG-CGCAGGACAAG  
GATGGAGATGGTGAG---TCCGC-----CACGAA-C-AATAGC-----CAAA-AGGCCTCGAAC-AAAG-----GCCGTGCG--

-----TGCGA-----ACAG-ATATTG-----ACTATATC-GAA-----TAGGCCAAATCACAACCAAGGAACTGGGCACC  
GTCATGCGTTCCCTCGGCCAGAACCCCTCCGAATCCGAACTGCAGGACATGATCAACGAGGTGCGATGCTGACAA  
CAACGGCACAATCGACTTCCCTGGTATGACAACTACA-----AACT--CGCATTCT-----ATGGC---AG-TA  
CTAACTGC--C---G-CAGAATTCTTGACAATGATGGCCCGCAAGATGAAGGATACCGACTCCGAGGAAGAGATCCG  
CGAGGCTTTCAAGGTGTTTGACCGTGACAACAATG

>KF741958\_Talaromyces\_marneffeii CBS 388.87

TG-GATTTCTGG-TTGT-C-----GCAATGTTG---TGG-TGG--GTGGTTCGCTGACTAG-CCGTTTGGATG-AATAGGA  
CAAGGATGGTGTGAGTGA--CGC-----CACGAA-C-ACCAGA-----CATATAGTCTTCGAACAAAA-----GTTAT  
TAC-----TGCGA-----ACAG-ATATTA-----ATAACATC--AA-----TAGGTCAAATTACAACCAAGGAACTGGGCA  
CCGTCATGCGTTCCCTCGGCCAGAACCCCTCCGAATCCGAATTGCAGGACATGATCAACGAGGTGCGACGCTGAC  
AACAACGGCACAATCGATTCCCTGGTATGATGCAGCCTC-----TATTTATCGCAGCCGTTTCCGATCATA-----AG  
GGC--AGATACTGACTGC--C---T-TAGAATTCTTGACAATGATGGCCCGCAAATGAAGGATACCGACTCCGAGGA  
AGAGATCCGCGAGGCTTTCAAGGTGTTTGATCGTGACAACAATG

>KJ885274\_Talaromyces\_muroii CBS 756.96

TG-GATTTCTAC-TTGT-C-----GCAATGTTG---TGG-TGG--GTGGTTAGCTGACTAG-CCGTTTTGATG-AGTAGGAC  
AAGGATGGAGATGGTGTGAG--TCCGC-----CACGAA-A-AATAAC-----CAA-AGGCCTTGAAC-AAAG-----GTTATCG  
C-----TGCGA-----ACAG-ATATTG-----ACTATGTC-GAA-----TAGGTCAAATCACAACCAAGGAACTGGGCA  
CCGTCATGCGTTCTCTCGGCCAGAACCCCTCCGAATCCGAATTGCAGGACATGATCAACGAAGTGCAGCGCTGAC  
AACAACGGCACAATCGATTCCCTGGTATGACAAACCACA-----AGCT--CGCAATAATCT-----ATGGC---A  
G-TACTAACTGC--C---G-CAGAATTCTTGACAATGATGGCCCGCAAATGAAGGATACCGACTCCGAAGAAGAGAT  
CCGCGAGGCTTTCAAGGTGTTTGACCGCGACAACAATG

>KJ775425\_Talaromyces\_oumae-annae CBS 138208

TG-GATTTCTGA-TTGA-C-----GCAATGTTT---G-TGATCGTGGTTAGCTGACTAG-CCGTTTTGATG-AGTAGGAC  
AAGGATGGAGATGGTGTGAGT-ACCGC-----CACGAA-C-GTCGAT-----GATACAGTCAACGAAT-AAGGGCTATCCT  
TATGAT-----TGCGA-----ACAGCATATTG-----ATGGTATTTGAA-----CAGGTGAGATCACCAACCAAGGAATT  
GGGCACCGTCATGCGTTCCCTCGGCCAGAACCCCTCCGAATCCGAATTGCAGGACATGATCAACGAGGTGCGACG  
CTGACAACAACGGCACAATCGATTCCCTGGTATGACATAACC-----TATCAGACGCAGCCATATATGACTATCGA---  
-----GTGGC---AG-AACTAATTGC--C---A-CAGAATTCTTGACAATGATGGCCCGCAAATGAAGGATACCGACTCCG  
AGGAAGAGATCCGTGAGGCTTTCAAGGTGTTTGACCGCGACAACAATG

>KF741936\_Talaromyces\_panamensis CBS 128.89

TG-GATTTTGTGTTGGT-C-----GCAATGTTG---TGG-TGG--GCTGTTAGCTGACGCG-CCGTGTTGATG-AGTAGGA  
CAAGGATGGCGATGGTGTGAGTATCCGC-----CACGAG-C-ACCAAC-----AATG-CAGTTTTGAGC-AAGG-----GATA  
TGATGATGAAACATGA-----ACAACGGATTG-----ATTGTATCTAAA-----TAGGTCAAATCACAACCAAGGAA  
CTCGGCACCGTCATGCGTTCCCTCGGCCAGAACCCCTCCGAATCCGAATTGCAGGACATGATCAACGAGGTGCGA  
CGCCGACAACAACGGCACAATCGATTCCCTGGTATGAGCCAACCCGTCTA-CGTTTGTTACG-----  
-GGGGC---AG-AACTAACTGC--C---TACAGAATTCTTGACAATGATGGCTCGCAAATGAAGGATACCGACTCCGAA  
GAAGAGATCCGTGAGGCTTTCAAGGTGTTTGACCGCGACAACAATG

>KF741964\_Talaromyces\_pinophilus CBS 631.66

TG-GAAATCTGG-TTGT-C-----GCAATGTTG---TGG-TGG--ATGGTTAGCTGACTAG-CCGTTTTGATG-AGTAGGAC  
AAGGATGGAGATGGTGTGAG--TCCGC-----CACGAA-C-A-CGAC-----GATATTTGTCTCGAAC-AAAG-----GTTTTT  
C-----ACGA-----GCAT-ATATTG-----ATAAAATC-TAA-----TAGGCCAAATTACAACCAAGGAACTGGGCACC  
GTTATGCGTTCCCTCGGCCAGAACCCCTCCGAATCCGAACTGCAGGACATGATCAACGAAGTGCAGCGCTGACAA  
CAACGGCACAATCGATTCCCTGGTATGATATAAT-----TGTT--CACGGGTTTATACG-----ATGGC---AG-T  
ACTAACTGC--C---G-CAGAATTCTTGACAATGATGGCCCGCAAATGAAGGATACCGACTCCGAGGAAGAGATCC

GTGAAGCTTTCAAGGTGTTTGACCGTGACAACAATG

>KF741954\_Talaromyces\_primulinus CBS 321.48

TT-CATTCTGG-TTGT--C-----GCAATGTTG---TGG-TGG--GTGGTTAGCTGACCAG-CCGTTTTGATG-AGTAGGAC  
AAGGATGGAGATGGTGAGTG-ACCAC-----CGAA-C-ACCAAC-----GTTACAGTCAACGAAT-AAGGGCTATCTTTA  
TGAT-----TGGGA-----ACAG-GTATTA-----ATCGTC--GAA-----TAGGTCAAATCACAACCAAGGAACTGGG  
CACCGTATGCGTTCCCTCGGCCAGAACCCTCCGAATCCGAGTTGCAGGACATGATCAACGAAGTTCGACGCTG  
ACAACAACGGCACAATCGATTTCCTGGTATGACTCATCAGTCTATTGCTTGATACG-----ATGGC  
---AG-TACTGACCGC--T---G-CAGAATTTTTGACAATGATGGCCCGCAAATGAAGGATACCGACTCCGAGGAAGA  
GATCCGCGAGGCTTTCAAGGTGTTTGACCGCGACAACAATG

>KF741947\_Talaromyces\_purpurogenus CBS 286.36

TGCAATCATTGT-TTG-----GGTATGTTG---T---TGG--CCGGTTATCTAATTAGCCCGTTTGGATG-AGTAGGACAA  
GGATGGTGATGGTGAG---TTCACCCGGACACGCAGCGATCAAC-----GATA-AGACTCTGA-----  
-----ACAGGATATTT-----ACTATATC-GAT-----TAGGTCAAATCACAACCAAGGAACTGGGCACCGTCATG  
CGCTCCCTCGGCCAGAACCCTCCGAATCCGAATTGCAGGACATGATCAACGAAGTTGACGCTGACAACAACGG  
CACAATCGATTTCCCTGGTATGATGA-----CTCTCGCTACAATCTACT-----GCGGATA-GGTAAGTATGAT  
TGA--TAATGGATAGAATTCTTGACAATGATGGCCCGCAAATGAAGGATACCGACTCCGAGGAAGAGATCCGTGA  
GGCTTTCAAGGTGTTTGACCGTGACAACAATG

>KF741938\_Talaromyces\_ruber CBS 132704

TG-GAAACTTGGTTTGT-C-----ACAATGTTG-----GC--GTGGTTAGCTGACTAG-CCGTTTTGATG-AATAGGACA  
AGGATGGAGATGGTGAG---TCGC-----CGCGAA-C-AATGAA-----ACACCTTGAAC-GAAC-----ATTACCGC---  
---AGTCA-----ACAG-ACATTG-----ACCCTATC-GGA-----CAGGACAAATCACAACCAAGGAACTCGGCACA  
GTCATGCGTTCTCTCGGCCAGAACCCTCCGAATCCGAATTGCAGGACATGATCAACGAAGTTCGACGCTGACAA  
CAACGGCACAATTGATTTCCCTGGTATGACTGACCACC-----AACT--CGCAATATTTG-----ATGGC---AG-  
TACTGACTGC--C---G-CAGAATTCTTGACAATGATGGCCCGCAAATGAAGGATACCGACTCCGAGGAAGAGATC  
CGTGAGGCTTTCAAGGTGTTTGACCGTGACAACAATG

>KF741956\_Talaromyces\_rubicundus CBS 342.59

TG-GATTTCTTC-TTGT--C-----GCAATGTTG-----TGG--GTGGTTAGCTGACTAG--CGGTTTAATG-AGTAGGACAA  
GGATGGAGATGGTGAG---TTCGC-----CATGAA-C-AACGAA-----CAAA-AGACCTTGCTC-AAAG-----GTCATTGC-  
-----TGCGA-----ACAG-ATATTG-----ACTATATC-GAA-----TAGGTCAAATCACAACCAAGGAACTGGGCACT  
GTCATGCGTTCCCTCGGCCAGAACCCTCCGAATCCGAATTGCAGGACATGATCAACGAAGTTCGACGCTGACAA  
CAACGGCACAATCGATTTCCCTGGTATGACGAACCACACTAC-CACT--CGCAATATTCC-----ATAGC---A  
G-TACTAAGTGC--T---A-CAGAATTCTTGACAATGATGGCCCGCAAATGAAGGATACCGACTCCGAAGAAGAGATC  
CGTGAGGCTTTCAAGGTGTTGATCGATCGTGACAACAATG

>KJ775422\_Talaromyces\_sayulitensis CBS 138204

TG-CAAATCTGG-TTCT--C-----GCAATGTTG---TGG-TGG--GTGGTTAGCTGACTAG-CCGTTTTGATG-AGTAGGA  
CAAGGATGGAGATGGTGAG---CCCGC-----CACGAA-C-AATAAC-----CAAA-AAGCCTTGAAC-AAAG-----GTTGG  
TTC-----GCGA-----ACAA-ATATTG-----ATATGCTT-GAA-----TAGGCCAGATCACAACCAAGGAACTGGGC  
ACCGTCATGCGTTCTCTCGGCCAGAACCCTCCGAATCCGAACTGCAGGACATGATCAATGAAGTGGACGCTGA  
CAACAACGGCACAATCGATTTCCCTGGTATGATATAAT-----TGCT--CACGGATTATTACG-----ATGGC---A  
G-TACTAATTGC--C---G-CAGAATTCTTGACAATGATGGCACGCAAATGAAGGATACCGACTCCGAAGAAGAGAT  
CCGTGAGGCTTTCAAGGTGTTTGACCGTGACAACAATG

>KF741960\_Talaromyces\_siamensis CBS 475.88

TG-ACTTTCTAC-TTAT--C-----GCAATGTTG---TGG-T-G--GTGGTTAGCTGACTAG-CCGTTTTGATG-AATAGGACA  
AGGATGGAGATGGTGAG---TCGCCACGAACACAAA-C-AACAAC-----CAAA-CGACTTTGAAC-AAAG-----GCTAT

CA-----ACGG----ACAG-TTATTG-----ACTCTATC-GAA-----TAGGTCAAATCACAACCAAGGAACTGGGC  
ACCGTCATGCGTTCCCTCGGCCAGAACCCCTCGGAATCCGAATTGCAGGACATGATCAACGAGGTGACGCTGA  
CAACAACGGCACAATCGATTTCCCTGGTATGACAAAGCACACAAC-TACT---CGCAATATTCC-----ATGG  
C---AG-TACTAACTGC--T---G-CAGAATTCCTGACAATGATGGCCCGCAAATGAAGGATACCGACTCCGAGGAAGA  
GATCCGCGAGGCCCTCAAGGTGTTTGATCGTGACAACAATG

>KF741957\_Talaromyces\_stipitatus CBS 375.48

TGCAGTGATTGT-TTG-----GTAATGGT-----GTGGTTATCTAACTAA-CCGTTTCGATC-AATAGGACAAGGA  
TGGCGATGGTGAG---TTCACCCAAACACGCAGC-ACCAAC-----GATAGGGTATATTAGT-----ATGATC-----  
TACGG----ACGG-ACATTG-----ACAATATT-GAT-----CAGGCCAAATTACCACCAAGGAACTGGGCACCGTC  
ATGCGTTCGCTCGGCCAGAACCCCTCCGAATCCGAATTGCAGGACATGATCAACGAAGTTGACGCTGACAACAA  
CGGCACAATCGATTTCCCTGGTATGACGACTCTAC----TACCCCTTACAATCCAGT-----GTGGATA-GGT  
GACTTACTGA--TGCTGGCTAGAATTTTTGACAATGATGGCCCGCAAATGAAGGATACCGACTCCGAGGAAGAGA  
TCCGTGAGGCTTTCAAGGTCTTTGATCGCGACAACAATG

>JX315646\_Talaromyces\_stollii CBS 408.93

TG-GATTCCTTG-TTGT--C-----GCAATGCTA---GCG-TGG--GTGGTTTGCTGACGAG-CCGCTTGATG-AGTAGGA  
CAAGGATGGAGATGGTGAG---TCGC----CGCGAA-C-AATGAA-----GCTGCTTGAAC-GAAT-----C-----  
-AGCCA----ACAG-ACCTTA-----ACTCTATC-GAA-----CAGGACAAATCACAACCAAGGAACTTGGCACCGT  
CATGCGTTCCTCGGCCAGAACCCCTCCGAATCCGAATTGCAGGACATGATCAACGAAGTCGACGCTGATAACAA  
CGGCACAATCGATTTCCCTGGTATGATAGACCACC----AGCT---CGCACTTTTTG-----ATGGC---AG-CAC  
TAACTGC--C---G-CAGAATTTTTGACAATGATGGCCCGCAAATGAAGGATACCGACTCCGAGGAAGAGATCCGT  
GAGGCTTTCAAGGTGTTTGACCGTGATAACAATG

>KF741940\_Talaromyces\_thailandensis CBS 133147

TG-GGTTTCCGG-TTGT--C-----GCAATGTTG---TGGCTGG--GTGGTTAGCTGACTAG-CCGTTTTGATG-AATAGGA  
CAAGGATGGAGATGGTGAGTGAGCCGC-----AATGAT-C-ACCAAC-----GATGCAATCTTTGGACAAGAA-----TAT  
CAG-----CACGA-----ACAGTATCCTG-----ACTATATCTGAA-----TAGGTCAAATCACAACCAAGGAACTGG  
GCACCGTCATGCGTTCCTCGGCCAGAACCCCTCCGAATCCGAGCTGCAGGACATGATCAACGAAGTCGACGCTG  
GACAACAACGGCACAATCGATTTCCCTGGTATGAAACAAT-----TGCT---TACGGGCGTTACG-----ATGG  
C---AGAACTAACTGC--C---TACAGAATTCTTGACAATGATGGCCCGCAAATGAAGGATACCGACTCCGAGGAAG  
AGATCCGTGAGGCTTTCAAGGTGTTTGATCGCGACAACAATG

>KF741944\_Talaromyces\_verruculosus CBS 388.48

TG-AATTTCTGG-TTAT--C-----GCAATGTTG---TGG-TGG--GTAGTTAGCTGACTAG-CCGTTTTGTTG-AGTAGGAC  
AAGGATGGAGATGGTGAGTG-ACCGC-----CACCAA-C-ACCGAC-----GATC-TAGTCTCGAAC-AAAG-----GCTAT  
TTG-----TACGA-----TCAG-ATATTG-----ACGATATCTGAA-----TAGGTCAAATCACAACCAAGGAACTGGG  
CACTGTGATGCGTTCCTCGGCCAGAACCCCTCCGAATCCGAATTGCAGGACATGATCAACGAGGTTGACGCTG  
ACAACAACGGCACAATCGATTTCCCTGGTATGACATAACC-----TATCAACCGCAAACATATATGACAGTTGG-----  
ATGGC---AG-AACTAACTGC--C---A-CAGAATCTTGACAATGATGGCTCGCAAATGAAGGATACCGACTCCGAGG  
AAGAGATCCGTGAGGCTTTCAAGGTGTTTGACCGCGACAACAATG

>KF741935\_Talaromyces\_viridis CBS 114.72

TG-TATTTCTTG-TTGT--C-----GCAATGTTG---TGG-TGG--GTGGTTAGCTGACTAG-TCGTTTTGATG-AGTAGGAC  
AAGGATGGAGATGGTGAGTCAACCGC-----CACG-----CAAC-----GATAAATCTTTGAAC-AAAATCTACTATTGT  
AAT-----TACGA-----ACAAAATATTG-----ACCATATCTGAA-----AAGGTCAAATCACAACCAAGGAACTGGG  
CACCGTCATGCGTTCCTCGGCCAGAACCCCTCCGAATCCGAATTGCAGGACATGATCAACGAAGTCGACGCTG  
ACAACAACGGCACAATCGATTTCCCTGGTATGACAGA-CACACTAC-AACG---CACAATCGTCT-----ATG  
GC---AGAACTAACTGC--C---GATAGAATCTTGWCAATGATGGCCCGCAAATGAAGGATACCGACTCCGAGGA

AGAGATCCGTGAGGCTTTCAAGGTGTTTGACCGTGACAACAATG

>KF741943\_Talaromyces\_viridulus CBS 252.87

TG-GATTTCTGG-TTGT-C-----GCAATGTTG---TG--TGG--GTAGTTAGCTGACGAG-CCGTTTTGATG-AGTAGGAC  
AAGGATGGAGATGGTGAGTG-ACCAC----CACAAA-C-ACCGGC-----GATA-TGGTCTTGAAC-CGAG-----GTTATT  
AC-----TACGA-----ACAT-ATATTG-----ACGGTATTTGAA-----CAGGTCAAATCACAACCAAGGAACTGGGC  
ACCGTCATGCGTTCCCTCGGCCAGAACCCTCTGAATCCGAATTGCAGGACATGATCAACGAGGTGCGACGCTGA  
CAACAACGGCACAATCGATTTCCCTGGTATGACCCAACACGTCTA-CGCTGAACACG-----ATGGC-  
--GG-TACTAACTGC--C----A-CAGAATTCTTGACAATGATGGCCCGCAAATGAAGGATACCGACTCCGAGGAAGAG  
ATCCGCGAGGCTTTCAAGGTGTTTGACCGCGACAACAATG

>KP765382\_Talaromyces\_qii\_AS3.15414

TG-GTTTTCCGG-TTGT-C-----GCAATGTTG---TGG-CGG--GTGGTTAGCTGACTCG-CCGTTTTGATG-AGTAGGA  
CAAGGATGGAGATGGTGAGTGAGCCGC-----AATGAT-C-ACCAAC-----GATGCAGTCTTTGGACGAGTA-----AA  
TCAG-----CACGA-----ACAGTATCCTG-----ACTATATCTGAA-----TAGGTCAAATCACAACCAAGGAACTG  
GGCACCGTCATGCGTTCCCTCGGCCAGAACCCTCCGAATCCGAATGCAGGACATGATCAACGAAGTGCAGC  
CTGACAACAACGGCACAATCGATTTCCCTGGTATGACACAATC-----ATCT---TACGGTCGCTACG-----AT  
GGC---AGAGACTAACTGC--C----TACAGAATTCCTGACAATGATGGCCCGCAAATGAAGGATACCGACTCCGAGG  
AAGAGATCCGTGAGGCTTTCAAGGTGTTTGACCGCGACAACAATG

>KP765383\_Talaromyces\_fusisporus\_AS3.15415

TG-GATTCCTGG-TTGTGCGTGTGTTGTGCAATGCTA---TAG-CGG--GCGGTTAGCTGACTAG-CCGTTTTGATG-AAT  
AGGACAAGGATGGAGATGGTGAGTTTCTTAC--GAACACGAA-C-GACAAC-----GATACGATTTTTGGA--GAAT----  
-ATTATGAC-----TACGA-----ACAACATATTG-----ATAAAGTC-CAA-----TAGGTCAGATCACAACCAAGGAA  
CTGGGCACCGTCATGCGTTCCCTCGGCCAGAACCCTCCGAATCTGAATTGCAGGACATGATCAACGAAGTGCAG  
CGCTGACAACAACGGCACAATCGATTTCCCTGGTATGACAGTACACA-----AAAT---TGCAATTTTTGG-----  
AGGGC---AG-TACTAACTGC--C----G-CAGAATTCCTGACAATGATGGCCCGCAAATGAAGGATACCGACTCCGAG  
GAAGAAATCCGTGAGGCTTTCAAGGTGTTTGACCGTGACAACAATG

>KJ885289\_Talaromyces\_helicus CBS\_335.48

TG-----ACGTTTTGA-----GCAAGAATT---GTG-TGGCAGCAATCTAATATTTTATGATCTTGATGATG-TACAGGACAA  
AGATGGCGATGGTGAG---TTTGT-----CGAGAG-C-ATTTACTCCGAATTGCAGATAAGCAATCAAC-GAAGAAAAAAG  
GGGTGCA-----CATGG-----ACACAAACCTGTGAATACTGTACTAAAAGCGTGATCGACGTTGGCCAGGTCAAAT  
CACAACCAAGAAGTCCGGTACCGTCATGCGCTCTCTCGGCCAGAACCCTTCCGAATCCGAATTGCAGGACATGAT  
CAACGAAGTCGACGCTGATAACAACGGCACAATTGACTTTCTGGTATGATCAAAATCCGTCTCTACT---CCCCT  
GTTTTGCCAGCTCCCCCTCGCAGTGTGAT---TAATAGAAAGGGT-----ATTAGAATTCTTGACCATGATGGCTCGC  
AAAATGAAGGATACCGACTCCGAAGAAGAAATCCGCGAGGCATTCAAGGTGTTTGACCGCGACAACAATG

Data S1. The sequence alignment of *CaM*.



## Supplementary dataset 2

>KF741929\_Talaromyces\_acleatus\_ CBS 289.48 bt

GTGAGTTTG-ACTCT-CGAC-----CCAAGCTTTCTA-TCAATTGTCGCGAC-AACACGCT-----GACTCT-TTCCAGGC  
AAATCATCTCTGCTGAGCATGGTCTCGATGGCTCTGGTGTGTAA-----GTATC---CATGA-ATGG-AATCCAGCTAC  
AATCCGACA--A-TATCTGATAATC-AACAGCTACAATGGCTCCTCTGACCTCCAGTTGGAGCGTATGAACGTCTACT  
TCAACGAGGTGCGT-----CG-----AAC----CAAT-CCACCAAAT-AACGA--A-ACAA-----AC---TCACA  
A-TG--G--TA-TAGGCCTCCGGCAACAAATACGTCCCCCGTGCTGTCCTCGTCGACTTGGAGCCCCGG

>JX315623\_Talaromyces\_amestolkiae CBS 132696

GTGAGTTTG-A--CT-CGTC-----CCAAGC-TACTA-TCAATTGTCGCGAC-AGCACGCT-----GACT-T-ATCCAGGCAA  
ATCATCTCTGCTGAGCACGGTCTCGATGGCTCTGGTGTGTAA-----GTATT--TCACAG-TTCG-AATACACCTACAG  
TCCGACA--A-CATCTGATCATC-GACAGCTACAATGGCTCCTCCGACCTCCAGTTGGAGCGTATGAACGTCTACTT  
CAACGAGGTGCGT-----TA-----GAAAG---TCTC-TCGACTCCT--ATAG--A-ACAG-----AC---ACTCAT-  
TC--A--TC-TAGGCCTCCGGCAACAAATACGTCCCCCGTGCCGTCCTCGTCGATTTGGAGCCCCGG

>KF183640\_Talaromyces\_angelicus KACC 46611

GTGAGTTTT-A--CT-CGAC-----CCGAACTTTCTA-TCAATTGTCGCGAC-AACACGCT-----GACT-T-TTCCAGGCAA  
ATCATCTCTGCTGAGCACGGTCTCGATGGCTCTGGTGTGTAA-----GTATT--ACATGA-TTCG-ATTCCAGCTACAA  
TCCAACA--A-TATCTGATCATC-AACAGCTACAATGGCTCCTCCGACCTCCAGTTGGAGCGTATGAACGTCTACTTC  
AACGAGGTGCGT-----CA-----GAC----GATT-CCACCATATAACAA--A-ACAAA-----AC---TCATCG--  
G--G--TA-TAGGCCTCCGGCAACAAATACGTCCCCCGTGCTGTCCTCGTCGACTTGGAGCCCCGG

>KF741916\_Talaromyces\_apiculatus CBS 312.59

GTGAGTTTG-ACTCT-CGACA-----CCAAGCTTTCTA-TCAGTTGTCGCGTC-AACACGCT-----GACTCTGTCCCAG  
GCAAATCATCTCTGCTGAGCACGGTCTCGATGGCTCCGGTGTGTAA-----GTATC---CACGG-TTCG-AATCCAGG  
TACAATTCGACA--A-TATCTAATAATC-AACAGCTACAATGGCTCCTCTGACCTCCAGTTGGAGCGTATGAACGTCTA  
CTTCAACGAAGTGCCT-----CG-----AAAC----CAAT-CCACCATAT-AACGA--A-ACAA-----AC---TCA  
CAG-TG--G--TA-TAGGCCTCCGGCAACAAATACGTCCCCCGTGCTGTCCTGGTTCGACTTGGAGCCCCGG

>KF741917\_Talaromyces\_aurantiacu CBS 314.59

GTGTGTAATAA-----AGAC-----TTGG-TCAATTGTCGCCACAAAAAAGCT-----GAAT-T-TTCTAGGCAAATCAT  
CTCTGCTGAGCACGGTCTCGATGGCTCCGGTGTGTAA-----GTGTTACAAACCA-TTCG-AATGCAGTTATAATCC  
GACA--C-CATCTGATCATC-AATAGCTACAATGGCTCCTCCGACCTCCAGTTGGAGCGTATGAACGTCTACTTCAAC  
GAGGTGCGTGGAACAACCATCA-----GAAA-----AT-CAATCGAATGCTTGG--A-----AC---TCATCT  
CTC--GAATA-TAGGCCTCCGGCAATAAGTACGTCCCCCGTGCCGTCCTTGTTCGACTTGGAGCCCCGG

>HQ156944\_Talaromyces\_calidicanus CBS 112002

GTGAGTTTG-ACCTT-CACC-----CCAAATTTCAACTCAATTATCGCGAC-AACACGCTGACTCGGACTCT-TCCCA  
GGCAAATTATCTCCGCTGAGCACGGTCTCGACGGCTCCGGTGTGTAA-----GTATT--ACACTA-TTCA-AATCCAG  
CTACAATCCGACA--AATATCTGATAATC-AACAGCTACAATGGCTCCTCCGACCTCCAGTTGGAGCGTATGAACGTT  
TACTTCAACGAGGTTTCGT-----CA-----GAC----CCAT-CCACCTCATAAACCGCAA-ACAA-----GC---  
TCATGATCG--A--TA-CAGGCTCCGGCAACAAATATGTCCCCCGTGCTGTCCTCGTCGACTTGGAGCCCCGG

>KF183641\_Talaromyces\_cnidii KACC 46617

GTGAGTTTG-A--CT-CGAC-----CCAAACTTTCTA-TCAATTGTCGCGAC-AACACGCT-----GACT-T-TTTCAGGCAA  
ATCATCTCTGCTGAGCACGGTCTTGTGGCTCTGGTGTGTAA-----GTATT---CACGAATTCG-AATCCAGCTACAA  
TCCGACA--A-TATCTGATCGTC-AACAGCTACAATGGCTCCTCCGACCTCCAGTTGGAGCGTATGAACGTCTACTTC  
AACGAGGTGCGT-----CG-----AAC----CAAT-CCACCATAT-AACGA--A-ACAA-----AC---TCACAA-T  
G--G--TATTAGGCCTCCGGCAACAAATACGTCCCCCGTGCTGTCCTCGTCGACTTGGAGCCCCGG

>JX494306\_Talaromyces\_derxii CBS 412.89

GTGAGTTCTGACT---CGACTG-----TAAAAGTCTCAG-TCAATTGTGCGGACAAACATGCT-----GACT-T-TACCAGGC  
AAATCATCTCTGCCGAGCACGGTCTCGACGGCTCTGGTGTGTAA-----GTGTTGCAAACGA-CTCG-GATCCAAA  
TACAAGCCGATAGTA-TATCTGATTATC-AACAGCTACAATGGCTCCTCCGACCTCCAGTTGGAGCGTATGAACGTC  
TACTTCAATGAGGTGCGTCAAATTAACCACCG-----AAAA----AAAC-CCATCGAATGCTTGA-----A  
C---TGATGTTTC--GAATA-TAGGCCTCCGGCAACAAATACGTGCCCCGTGCTGTCTCGTCTGACTTGGAGCCCCGG

>JX091384\_Talaromyces\_duclauxii CBS 322.48

GTGAGTTTG-ACCTT-CACT-----CCGAATTTTCAAGTCAATTGTGCGGAT-AACACGCTGACTCTGACTCT-TTCCA  
GGCAAATTATCTCTGCTGAGCACGGTCTCGACGGCTCCGGTGTGTAA-----GTATT--ACTCAA-TTCA-AATCCAG  
CTACAAATCCGACA--AGTATCTGATAATC-AACAGCTACAATGGCTCCTCCGACCTCCAGTTGGAGCGTATGAACGTT  
TACTTCAACGAGGTTTCGT-----CA-----GAC----CCAT-CCACACCATAAACCGCAA-ACAA-----GC---  
TCATGATCG--A--TA-CAGGCTTCCGGCAACAAATATGTCCCCCGTGTCTCCTCGTCTGACTTGGAGCCCCGG

>KJ865733\_Talaromyces\_euchlorocarpus PF 1203

GTGAGTTGG-ACTTT-CGACAA-----AAAAACTTTTCAAGTCAATTGTGCGGAC-ACCACGCT-----GACTCT-TTGCAGG  
CAAATCATCTCCGCTGAGCACGGTCTCGACGGCTCTGGTGTGTAA-----GTGTT-GGCAAAA-TTCGAAATCCAG  
CTACAAATCCGACA--A-TATCTGATAATC-ACCAGCTACAATGGCTCCTCCGACCTCCAGTTGGAGCGTATGAACGTC  
TACTTCAACGAGGTGCGT-----TA-----AGAA----CATCATCAAATAAACCGAAAGACAAAAAC-----A  
C---TCATCGTTC--G---A-TAGGCTTCCGGCAACAAATATGTCCCTCGTGTCTCCTCGTCTGACTTGGAGCCCCGG

>JX091376\_Talaromyces\_flavovirens CBS 102801

GTGAGTTTG-A--CT-CGAC-----CCAAACTTTTCTC-TCAATTGTGCGGAC-AAAACCCT-----GACT-T-TTTCAGGCAA  
ATCATCTCTGCTGAGCACGGTCTCGATGGCTCCGGTGTGTAA-----GTATT---CACCA-TTCG-AATCCAGCTACAA  
TCCGACA--A-TGTCTGATCGTC-AACAGCTACAATGGCTCCTCCGACCTCCAGTTGGAGCGTATGAACGCTACTT  
CAACGAGGTGCGT-----CG-----AAC----AAAT-CCACCATAT-AACGA--A-ACAAATAAAGAAACAGAC---T  
CACAA-TG--G--TA-TAGGCCTCCGGCAACAAATACGTCCCTCGTGTCTCCTCGTCTGACTTGGAGCCCCGG

>JX494302\_Talaromyces\_flavus CBS 310.38

GTGAGTTTG-ACTCT-CGAC-----CGAAACTC-----TCAATTGTGCGGAC-AACACGCT-----GACT-T-TTCCAGGCAAA  
TCATCTCCGCTGAGCACGGTCTCGACGGCTCCGGTGTGTAA-----GTATT--ACACGA-TTCA-AATCCAGCTACGA  
TCCAACA--A-TATCTGATAATC-AACAGCTACAATGGCTCCTCCGACCTCCAGTTGGAGCGTATGAACGTTTACTTC  
AACGAGGTGCGT-----CA-----AAC----CACT-CCACCTAATAAACGGAAG-ACAA-----AC---TCATGA  
TCG--A--TA-TAGGCTTCCGGCAACAAATATGTCCCTCGTGTCTCCTCGTCTGACTTGGAGCCCCGG

>JX091383\_Talaromyces\_funiculosus CBS 272.86

GTGAGTTTA-ACTCA-AAAC-----TA-TCAATTGGCGCAAC-AACACACT-----GACTCG--TCCAGGCAAATCA  
TCTCTGCTGAGCACGGTCTCGACGGCTCCGGTGTGTAA-----GTATT--CACGA-TCCG-AAACCAACTACAATCA  
GACA--G-TATCTGATAATC-AACAGCTACAATGGCTCCTCCGATCTCCAGTTGGAGCGTATGAACGCTACTTCAAC  
GAGGTGCGT-----AA-----AAC----AAAT-TCATCGTACAAACGG--AAATAAA-----TC---TCATAA-CG--  
G--TC-CAGGCCTCCGGCAACAAATATGTCCCTCGTGTCTCCTGGTTCGATTTGGAGCCCCGG

>JX091388\_Talaromyces\_galapagensis CBS 751.74

GTAAGTTTG-ACTGT-CAAC-----CCGAACTTTGCC-TCAGTTGTGCGGAC-AACACACT-----GACT-T-CTCCAGGC  
AAATCATCTCTGCTGAGCACGGCCTCGATGGCTCTGGTGTGTAA-----GTATT--GCACGA-TTCG-AATCTAGCTC  
CAATCCGACA--A-TATCTGATTGTC-AATAGCTACAATGGCTCCTCCGACCTCCAGTTGGAGCGTATGAACGCTACT  
TTCAACGAGGTGCGT-----TA-----TAAA----ACAC-TCGACTTAT--GCAG--A-ACAA-----AC---ACTCA  
T-TG--G--TA-TAGGCCTCCGGCAACAAATACGTCCCCGTGCTGTCTCCTCGTCTGACTTGGAGCCCCGG

>JX494308\_Talaromyces\_indigoticus CBS 100534

GTGAGTTTG-ACTCC-CGAC-----CCAAACTTTTCA-TCAATTGTGCGGAC-AACACGCT-----GACT-T-TTCCAGGC

AAATCATCTCTGCTGAGCACGGTCTCGACGGCTCTGGTGTGTAA-----GTATT--ACACGT-TTCG-AATCCACCTA  
CCATCCGGCA--G-TGTCTGATTATC-AACAGCTACAATGGCTCCTCCGACCTCCAGTTGGAGCGTATGAACGTCTA  
CTTCAACGAGGTGCGT-----TA-----GAA-----GACTCTCGACTCAT--GCAG--A-ACAAAC-----AC---TC  
AT--TG--G--TA-TAGGCCTCCGGAAACAAATATGTCCCCCGTGTCTCCTCGTCTCGACTTGGAGCCCGG

>JX091387\_Talaromyces\_intermedius CBS 152.65

GTGAGTTTG-ACTTT-GAAA-----ACAACTCTGGG-TCAATTATCGCGAC-AACACGCT-----GACTCT--TCCAGGCA  
AATCATCTCTGCTGAGCACGGTCTCGACGGCTCTGGTGTGTAA-----GTATT-TACACGA-TTCGAAATCCGATTAC  
AATCCGACA--A-TATCTGATAATC-AACAGTTACAATGGTTCTCCGATCTCCAGTTGGAGCGTATGAACGTTTACTT  
CAACGAGGTTCGT-----CA-----GAA-----CAAT-CCGCCAAACAAATCAAAC-ACAAG-----AC---TCAT  
CACTG--G--TA-TAGGCTTCCGGCAACAAATATGTCCCCCGTGTCTCCTCGTCTCGACTTGGAGCCCGG

>JX091380\_Talaromyces\_liani CBS 225.66

GTGAGTTGG-ACTCT-CGAC-----CCGAACTTTCTC-TCAATTGTCGCGAC-AACACGCT-----GACT-T-TTCCAGGC  
AAATCATCTCTGCTGAGCACGGTCTCGATGGCTCTGGTGTGTAA-----GTATT--GCACGA-TTCG-ACTCCAGCTA  
CGATCCGACG--A-TATCTGATAATC-AACAGCTACAATGGCTCCTCCGACCTCCAGTTGGAGCGTATGAACGTTTAC  
TTCAACGAGGTGCGT-----CA-----AC-----CAAT-CCATCGTATAAACGG--A-ACAAA-----GC---TCATA  
C-TG--G--TG-TAGGCCTCCGGCAACAAATACGTTCCCCCGTGTCTCCTCGTCTCGACTTGGAGCCCGG

>JX091382\_Talaromyces\_macrosporus CBS 317.63

GTGAGTTTG-ACTCT-CGGC-----CCAACCTTTCTA-TCAATGGTCGCGAC-AACACGCT-----GACTTT-TTCCAGGC  
AAATCATCTCCGCTGAGCACGGTCTCGACGGCTCTGGTGTGTAA-----GTATT--CACGA-TTCG-AATCCAGCGA  
CAATCCGACA--A-TATCTGATGATC-AACAGCTACAATGGCTCCTCCGACCTCCAATTGGAGCGTATGAACGTCTAC  
TTCAACGAGGTGCGT-----CA-----AAC-----CAAT-TCATCGTATAAACGG--A-ATAAA-----AC---TCATA  
A-TG--G--AA-TAGGCCTCCGGCAACAAATATGTCCCCCGTGTCTCCTCGTCTCGATTGGAGCCCGG

>JX091389\_Talaromyces\_marneffeii CBS 388.87

GTGAGTTTG-GCTCT-CAACAAACACATCACAACCTTTTCTCAG-TCACTTGTGCGGAC-AACACGCT-----GACTCTTTTCC  
AGGCAAATCATCTCCGCCGAGCACGGCTCGACGGCTCCGGTGTGTAA-----GTATT--ACACGA-TTCA-AATCC  
AGCTACAATCCGACA--ATTATCTGATGATC-AACAGCTACAATGGCTCCTCCGACCTCCAGTTGGAGCGTATGAAC  
GTTTACTTCAACGAGGTGCGT-----CA-----GAC-----CCTT-CCACCTAATAAACCGAAG-ACGA-----  
ACTCATCATCATCG--A--TA-TAGGCTTCCGGCAACAAATATGTCCCCCGTGTCTCCTCGTCTCGACTTGGAGCCCGG

>KJ865727\_Talaromyces\_muroii CBS 756.96

GTGAGTTTG-ACTCT-CGAC-----CCGAACCTTTCTA-TCAATTGTCGCGAC-AACACGCT-----GACT-T-TTCTAGGCA  
AATCATCTCTGCTGAGCACGGTCTCGATGGCTCTGGTGTGTAA-----GTATT--GCACGA-TTCG-ATTCCAGCTAC  
AATCCGACA--A-TATCTGATTATC-AACAGCTACAATGGCTCCTCCGACCTCCAGTTGGAGCGTATGAACGTCTACT  
TCAACGAGGTGCGT-----TA-----GAAA-----ACAC-TCGACTCAT--GCAG--A-ACAA-----AC---ACTCAT  
-TT--G--AA-TAGGCCTCCGGCAACAAATACGTTCCCCCGTGTCTCCTCGTCTCGACTTGGAGCCCGG

>KJ775213\_Talaromyces\_oumae-annae CBS 138208

GTGAGTTTG-G-TCC-CGAC-----CCAACTTTTCTA-TCAATCGTCGCAAC-AACATGCT-----GATT-C-TTTCAGGCAA  
ATCATCTCTGCTGAGCACGGTCTCGACGGCTCTGGTGTGTAA-----GTGTT--ACACGA-TTCG-AATCCAGCTACA  
ATCCGACA--A-TATCTGAC-ATC-AACAGCTACAATGGCTCCTCCGACCTCCAGTTGGAGCGTATGAACGTTTACTT  
CAACGAGGTGCGT-----CA-----GACCATCTCACC-ACACCAGATAACCCG--A-ACAAA-----AC---TC  
ATAATTG--G--TA-TAGGCCTCCGGCAACAAATATGTCCCTCGTGTCTCCTCGTCTCGACTTGGAGCCCGG

>HQ156948\_Talaromyces\_panamensis CBS 128.89

GTGAGTTTG-ACGTT-AAACACA-----ACGAGCTTTACA-TCAATTGTCGCGAC-AATACGCT-----GACTCT-TTCCAGG  
CAAATCATCTCTGCTGAGCACGGTCTCGACGGCTCTGGTGTGTAA-----GTGTTGGACACGA-TTCGAACTCCG  
GCTGCAATCCGACA--A-TTTTTAACGATC-AACAGTTACAATGGCTCCTCCGACCTCCAGTTGGAGCGTATGAACGT

CTACTTCAACGAGGTGCGT-----TA-----GGAA----CAGT-CGATC---CAAGCGAGAA-ACAA-----AC---  
TCATCAATT--G-ATA-TAGGCCCGCAACAAATATGTCCCTCGTGCCGTCCTCGTGGAGCCCGG

>JX091381\_Talaromyces\_pinophilus CBS 631.66

GTGAGTTGG-GCTCT-CGAC-----CTGGAATTTCTA-TCAATTGTCGTGAC-ACCACGTT-----GACT-T-TTCCAGGCA  
AATCATCTCTGCTGAGCATGGCCTCGATGGCTCTGGTGTGTAA-----GTATT--ACACGA-TTCG-AATGCAGCTAC  
AATCCGACA--A-GATCTGATAATC-AACAGCTACAATGGCTCCTCCGACCTCCAGTTGGAGCGTATGAACGTTTACT  
TCAACGAGGTGCGT-----CG-----AAC----CAAT-CCATTGTATAAG-GG--A-ACAAA-----GC---TCATA  
C-TG--G--TG-TAGGCCTCCGGCAACAAATACGTTCCCGTGCCGTCCTCGTGGAGCCCGG

>JX494305\_Talaromyces\_primulinus CBS 321.48

GTGAGTCTG-AATCT-CGAC-----TCGAACCTTTGTA-CTAATTGTCGCGAC-AATACGCT-----GACTCT-TTCCAGGCA  
AATCATCTCTGCTGAGCACGGTCTCGACGGCTCTGGTGTGTAA-----GTATT--ACGCGA-TTCG-AACCCAGCTAC  
AATTCGACA--A-TATCTGATCTTC-AACAGCTACAATGGCTCCTCCGACCTCCAGTTGGAGCGTATGAACGTCTACT  
TCAACGAGGTGCGT-----CA-----GA-----CCAC-TTACCAGATAAACCG--A-ACGAAA-----AC---TCATA  
T-TT--T-AA-TAGGCCTCCGGCAACAAATATGTCCCGTGCTGTCTCGTGGAGCCCGG

>JX315639\_Talaromyces\_purpurogenus CBS 286.36

GTGAGGAATGA-----CCACGCTTTCAG-TCAATTGTCGCGAC-GACTCGCT-----GACTAT-TTTCAGGCAAAT  
CATCTCTGCTGAGCACGGTCTCGATGGATCCGGCGTGTA-----GTGTT-GATGGGA-TTCGAAATCCATCTACAA  
TTCCGACC--G-TATCTGATAATC-AACAGTTACAATGGCTCCTCCGACCTCCAGTTGGAGCGTATGAACGTTTACTTC  
AACGAGGTGCGT-----CG-----AAC----AA---CCAACCAATAGAAACAAAAACAAA-----AC---TCATAT  
CCAATGCTAACAGGCTCCGGCAACAAATATGTTCCCTCGTGTCTCGTGGAAACCCGG

>JX315629\_Talaromyces\_ruber CBS 132704

GTGAGTTTG-A--CT-CGAC-----CCAAGCTTACTA-TCAATTGTCGCGAC-AGCACGCT-----GACT-A-GACCAGGCA  
AATCATCTCTGCTGAGCACGGTCTCGATGGCTCTGGTGTGTAA-----GTATT--TCACAA-TTGG-AATACACCTACA  
GTTCCGACG--A-TATCTGATCATC-GACAGCTACAATGGCTCCTCCGACCTCCAGTTGGAGCGTATGAACGTCTACTT  
CAACGAGGTGCGT-----TA-----GAAAG----TCTC-TCGACTCCT--ACAG--A-ACAG-----AC---ACTCAT  
-TC--A--TC-TAGGCCTCCGGCAACAAATATGTCCCTCGTGCCGTCCTCGTGGAGCCCGG

>JX494309\_Talaromyces\_rubicundus CBS 342.59

GTGAGTTTGAACCTCC-CGAC-----CCAACCTTTCCA-TCAATTGTCGCGAC-AACACGCT-----GACT-T-TTCCAGGC  
AAATCATCTCTGCTGAGCACGGTCTCGACGGCTCTGGTGTGTAA-----GTATT--AGACCG-TACG-AATCCGACTA  
CAATCCGACA--G-TATCTGATTATC-AACAGCTACAATGGCTCCTCCGACCTCCAGTTGGAGCGTATGAACGTCTAC  
TTCAACGAGGTGCGT-----TA-----GAAA----ACAT-TCGACTCAT--GCAG--A-ACAAA-----AC---ACTC  
AT-TG--G--TA-TAGGCCTCCGGAAACAAATATGTCCCGTGCTGTCTCGTGGAGCCCGG

>KJ775206\_Talaromyces\_sayulitensis CBS 138204

GTGAGTTGG-ACTCT-CGAC-----TCGGACTTTCTA-TCAATTGTCGCGAC-AACACGCT-----GACT-T-TCCCAGGC  
AAATCATCTCTGCTGAGCACGGTCTCGATGGCTCTGGTGTGTAA-----GTATT--GCACGATTTCG-AATCCGGCTA  
CAATCCGACG--A-TATCTGATAATC-AACAGCTACAATGGCTCCTCCGACCTCCAGTTGGAGCGTATGAACGTCTAT  
TTCAACGAGGTGTGT-----CG-----AAC----CAAT-CCATCGTAT-AACGG--A-ACAAT-----AC---TTATAT  
-TA--G--TA-TAGGCCTCCGGCAACAAATACGTTCCCGTGCTGTCTCGTGGAGCCCGG

>JX091379\_Talaromyces\_siamensis CBS 475.88

GTGAGTTTG-A--CT-CGAC-----CCAAACTTTCTA-TCAATTGTCGCGAC-AACACGCT-----GACT-T-TTTCAGGCAA  
ATCATCTCTGCTGAGCACGGTCTCGATGGCTCTGGTGTGTAA-----GTATT--CACGACCTCG-AATCCAGCTACA  
ATCCGACA--A-TATCTGATCGTC-AACAGCTACAATGGCTCCTCCGACCTCCAGTTGGAGCGTATGAACGTCTACTT  
CAACGAGGTGCGT-----CG-----TAC----CAAT-CCACCATAT-GACGA--A-ACAA-----AC---TTACAA-T  
G--G--TATTAGGCCTCCGGCAACAAATACGTTCCCGTGCTGTCTCGTGGAGCCCGG

>JX315633\_Talaromyces\_stollii CBS 408.93

GTGAGTTTG-A--CT-CGAC-----CCAAACTTTCTA-TCAATTGTCGCGC-GGCACGCT-----GACT-T-GTCCAGGCA  
AATTATCTCTGCTGAGCACGGTCTCGATGGCTCTGGTGTGTAA-----GTATT--TCACAA-TTCG-AATACACCCACA  
GTCCGAGG--T-TATCTGATCATC-GACAGCTACAATGGCTCCTCCGACCTCCAGTTGGAGCGTATGAACGTCTACTT  
CAACGAGGTGCGT-----TT-----GAAAG---TTTC-TCGACTCCT--GCAG--A-ACAA-----AC---ACTAAT-  
TC--A--GC-TAGGCCTCCGGCAACAAATACGTCCCCCGTGTCTCGTCTCGACTTGGAGCCCGG

>JX494294\_Talaromyces\_thailandensis CBS 133147

GTGAGTGTGACTCT-CGAC-----CCAAACTTTCGG-TCAATTCTCGCGAC-AACACGCT-----GACTCT-TTCCAGG  
CAAATCATCTCCGCTGAGCACGGTCTCGACGGCTCTGGTGTGTAA-----GTGTT-GATACGA-ATCGAAATTC---C  
ACAATTCGACA--A-TATCTGATAATC-AACAGCTACAATGGCTCCTCCGACCTCCAGTTGGAGCGTATGAACGTTTA  
CTTCAACGAGGTGAGT-----TA-----GACA----ACAC-TCGACTCG--AACAGAAC-ACAG-----AC---TC  
ATCAATT--G--CA-TAGGCTTCCGGCAACAAGTATGTCCCTCGTGTCTCGTCTCGACTTGGAGCCCGG

>KF741928\_Talaromyces\_verruculosus CBS 388.48

GTGAGTTTG-ACTCT-GGAA-----CCCAACTTTTGA-TCAATTGTTGCGAC-AGCACACT-----GACT-C-TTTCAGGCA  
AATCATCTCTGCTGAGCACGGTCTCGACGGCTCCGGTGTGTAA-----GTATA--ACACGA-TTCG-AATCCAGCTGC  
AGTCCGACG--A-TATCTGATGATC-AACAGCTACAATGGCTCCTCCGACCTCCAGTTGGAGCGTATGAACGTCTAC  
TTCAACGAGGTGCGT-----CA-----GAC----CAAT-CCACTAGATAAATCG--A-ACAAA-----AC---TCAT  
CCCTC--G--A--TAGGCTTCCGGCAACAAATATGTCCCCCGTGTCTCGTCTCGACTTGGAGCCCGG

>JX494310\_Talaromyces\_viridis CBS 114.72

GTGAGTTTG-ACTCTGAGAC-----CGAAACTCTCAGTCAAATTGTT-----T-----GACTCT-TTCCAGGCAAATCA  
TCTCTGCTGAGCACGGCTCGATGGCTCCGGTGTGTAA-----GTATTTGACTTGG-TTCG-AATCCAGCTACAATC  
CGACA--A-TCTCTGATCATC-AACAGTTACAATGGCTCCTCCGACCTCCAGTTGGAGCGTATGAACGTTTACTTCAA  
CGAGGTGCGT-----TA-----GAAAACAAGACAT-TCGACTCA--ACCGG---ACAAA-----AC---TCATCA  
GTT--G--GTTTAGGCTTCCGGCAACAAATATGTTCTCGTGTCTCTCGTCTCGACTTGGAGCCCGG

>JX091385\_Talaromyces\_viridulus CBS 252.87

GTGAGTTTG-G-TCT-CGAC-----CCAAACTTTCTA-TCAATTGTCGCAAC-AACACGCT-----GACT-C-TTTCAGGCA  
AATCATCTCTGCTGAGCACGGTCTCGACGGCTCTGGTGTGTAA-----GTATC--GCACGA-TTCG-AATCCAGCTAC  
AACCCGACA--A-TATCTGACAATC-AACAGCTACAATGGCTCCTCCGACCTCCAGTTGGAGCGTATGAACGTTTACT  
TCAACGAG---GT-----CA-----GAC----CACT-CCACCAGATAAATCG--A-ACAAA-----AC---TCATAAT  
TG--G--TA-TAGGCCTCCGGCAACAAATATGTCCCTCGTGTCTCTCGTCTCGACTTGGAGCCCGG

>KP765380\_Talaromyces\_qii\_AS3.15414

GTGAGTGTGACTCT-CGAC-----CCAAACTTTCAG-TCAATTCTCGCGAC-AACACGCT-----GACTCT-TTCCAGG  
CAAATCATCTCCGCTGAGCACGGTCTCGACGGCTCTGGTGTGTAA-----GTGTT-GATACGA-ATCGAAATCC---TA  
CAATTCGACA--C-TATCTGATAATC-AACAGCTACAATGGCTCCTCCGACCTCCAGTTGGAGCGTATGAACGTTTAC  
TTCAACGAGGTGCGT-----TA-----GA-A-----TCAC-TCGACTCA--AACGAAAC-ACAG-----AC---TCAT  
CAATT--G--CA-TAGGCTTCCGGCAACAAGTATGTCCCTCGTGTCTCTCGTCTCGATTGGAGCCCGG

>KP765381\_Talaromyces\_fusisporus\_AS3.15415

GTGAGTTGG-A--CA-CGAC-----CCAAACTTTCTA-TCAATTGTCGCGAC-AGCACGCT-----GACT-T-GTC-AGGCAA  
ATCATCTCTGCTGAGCACGGTCTCGATGGCTCTGGTGTGTAA-----GTATT--ATACGA-TTCG-AATCCAGCTACAA  
TCCGACA--G-TATCTGATCATC-AACAGCTACAATGGCTCCTCCGACCTCCAGTTGGAGCGTATGAACGTCTACTTC  
AACGAGGTGCGT-----TA-----GGAT----TTCC-TCGGCTCAT--GCAG--A-ACAA-----AC---ACTCAT-AT  
--G--AA-TAGGCCTCCGGCAACAAATACGTCCCCCGTGTCTCGTCTCGACTTGGAGCCCGG

>KJ865725\_Talaromyces\_helicus\_CBS\_335.48

GTCCATCAT-ATTCT-TGTT-----CCCTCTG-CTAATCGTCATAAC-----CAGGCAAATCATCTCTGC

TGAGCACGGCCTCGATGGCTCTGGTGTGTAAGTTGACCGTGTATT-CTGTCGACGTCGAAATCTATCATCGATCGC  
TCA--G-ATTCTGACCAACCACCAGCTACAATGGCTCCTCCGACCTTCAATTGGAGCGCATGAACGTCTACTTCAAC  
GAGGTACGC-----CAATCCATCTAAGGCCTACACGCATTCAAT-CCAATAACGCGAGAAAAAAAA-----  
-----A--TCTTAGGCCAACGGCAACAAATATGTTCCCTCGTGTCTCCTCGTCGATCTCGAGCCCGG

Data S2. The sequence alignment of *BenA*.

### Supplementary dataset 3

>KF741995\_Talaromyces\_acleatus\_CBS 289.48 its

CCTCCCACCCTTGTCTCT-ATAC-ACCTGTTGCTTTGGCGGGGCCACC-GGGGCCACCTGGTCGCCGGGGGACG--  
CACGTCCCCGGGCCCGCGCCCGCCGAAG-CGCTCTGTGAACCCTGATGAAGATGG-GCTGTCTGAGTA-GTATG-  
AAAATTGTCAAACTTTCAACAATGGATCTCTTGGTTCCGGCATCGATGAAGAACGCAGCGAAATGCGATAAGTAA  
TGTGAATTGCAGAATCCGTGAATCATCGAATCTTTGAACGCACATTGCGCCCCCTGGCATTCCGGGGGGCATGC  
CTGTCCGAGCGTCATTTCTGCCCTCAAGCACGGCTTGTGTGTTGGGTGCGGTCCCCC-GGGGACCTGCCCGA  
AAGGCAGCGGC-GACGTCCGTCT-GGTCCTCGAGCGTATGGGGCTTTGTCACTCG-CTCGGGAAGGACCTGCGG  
GGGTTGGTCA

>JX315660\_Talaromyces\_amestolkiae CBS 132696

CCTCCCACCCTTGTCTCT-ATAC-ACCTGTTGCTTTGGCGGGGCCACC-GGGGCCACCTGGTCGCCGGGGGACA--  
TCTGTCCCCGGGCCCGCGCCCGCCGAAG-CGCTCTGTGAACCCTGATGAAGATGG-GCTGTCTGAGTA-CTATG-A  
AAATTGTCAAACTTTCAACAATGGATCTCTTGGTTCCGGCATCGATGAAGAACGCAGCGAAATGCGATAAGTAAT  
GTGAATTGCAGAATCCGTGAATCATCGAATCTTTGAACGCACATTGCGCCCCCTGGCATTCCGGGGGGCATGCC  
TGTCCGAGCGTCATTTCTGCCCTCAAGCACGGCTTGTGTGTTGGGTGCGGTCCCCC-GGGGACCTGCCCGAAA  
GGCAGCGGC-GACGTCCGTCT-GGTCCTCGAGCGTATGGGGCTTTGTCACTCG-CTCGGGAAGGACTGGCGGGG  
GTTGGTCA

>KF183638\_Talaromyces\_angelicus KACC 46611

CCTCCCACCCTTGTCTCT-CTAC-ACCTGTTGCTTTGGCGGGGCCACC-GGGGCCACCTGGTCGCCGGGGGACG-  
-CACGTCCCCGGGCCCGCGCCCGCCGAAG-CGCTCTGTGAACCCTGATGAAGATGG-GCTGTCTGAGTA-CGATG  
-AAAATTGTCAAACTTTCAACAATGGATCTCTTGGTTCCGGCATCGATGAAGAACGCAGCGAAATGCGATAAGTAA  
TGTGAATTGCAGAATCCGTGAATCATCGAATCTTTGAACGCACATTGCGCCCCCTGGCATTCCGGGGGGCATGC  
CTGTCCGAGCGTCATTTCTGCCCTCAAGCACGGCTTGTGTGTTGGGTGCGGTCCCCC-GGGGACCTGCCCGAA  
AGGCAGCGGC-GACGTCCGTCT-GGTCCTCGAGCGTATGGGGCTTGTCACTCG-CTCGGGAAGGACCTGCGGG  
GGTGGTCA

>JN899375\_Talaromyces\_apiculatus CBS 312.59

CCTCCCACCCTTGTCTCT-CT-ATAC-ACCTGTTGCTTTGGCGGGGCCACC-GGGGCCACCTGGTCGCCGGGGGACG--  
CACGTCCCCGGGCCCGCGCCCGCCGAAG-CGCTCTGTGAACCCTGATGAAGATGG-GCTGTCTGAG-A-TTATG-A  
AAATTGTCAAACTTTCAACAATGGATCTCTTGGTTCCGGCATCGATGAAGAACGCAGCGAAATGCGATAAGTAAT  
GTGAATTGCAGAATCCGTGAATCATCGAATCTTTGAACGCACATTGCGCCCCCTGGCATTCCGGGGGGCATGCC  
TGTCCGAGCGTCATTTCTGCCCTCAAGCACGGCTTGTGTGTTGGGTGCGGTCCCCC-GGGGACCTGCCCGAAA  
GGCAGCGGC-GACGTCCGTCT--GGTCCTCGAGCGTATGGGGCTTGTCACTCG-CTCGGGAAGGACCTGCGGGG  
TTGGTCA

>JN899380\_Talaromyces\_aurantiacus CBS 314.59

CCTCCCACCCGTGTC----CTCTCACCTGTTGCTTTGGCGGGGCCACC-GGGGCCACCCGGTCGCCGGGGGACG--  
TCCGTCCCCGGGCCCGCGCCCGCCGAAG-CGCTCTGTGAACCCTGATGAAGATGG-GCTGTCTGAG-C-GAATG-  
AAAATTGTCAAACTTTCAACAATGGATCTCTTGGTTCCGGCATCGATGAAGAACGCAGCGAAATGCGATAAGTAA  
TGTGAATTGCAGAATCCGTGAATCATCGAATCTTTGAACGCACATTGCGCCCCCTGGCATTCCGGGGGGCATGC  
CTGTCCGAGCGTCATTTCTGCCCTCAAGCCCGGCTTGTGTGTTGGGCGTGGTCCCCC-GGGGACCTGTCCGAA  
AGGCAGCGGC-GACGTCCGTCT--GGTCCTCGAGCGTATGGGGCTT-GTCACTCG-CTCGGACGGATCGGCGGAG  
GTTGGTCA

>JN899319\_Talaromyces\_calidicanus CBS 112002

CCTCCCACCCTTGTCTCT-CTAC-ACCTGTTGCTTTGGCGGGGCCACC-GGGGCCACCCGGTCGCCGGGGGACG-

-TTCGTCCCCGGGCCCGCGCCCGCCGAAG-CGCCCTGTGAACCCTGATGAAGATGG-GCTGTCTGAGTA-CGATG-  
AAAATTGTCAAACTTTCAACAATGGATCTCTTGGTTCCGGCATCGATGAAGAACGCAGCGAAATGCGATAAGTAA  
TGTGAATTGCAGAATCCGTGAATCATCGAATCTTTGAACGCACATTGCGCCCCCTGGCATTCCGGGGGGCATGC  
CTGTCCGAGCGTCATTTCTGCCCTCAAGCACGGCTTGTGTGTTGGGTGTGGTCCCCC-GGGGACCTGCCCGAA  
AGGCAGCGGC-GACGTCCGTCT-GGTCCTCGAGCGTATGGGGCTTGTCACTCG-CTCGGGAAGGACCTGCGGG  
GGTTGGTCA

>KF183639\_Talaromyces\_cnidii KACC 46617

CCTCCCACCCTTGTCTCT-ATAC-ACCCGTTGCTTTGGCGGGCCACC-GGGGCCACCTGGTCGCCGGGGGACG-  
-TCCGTCCCCGGGCCCGCGCCCGCCGAAG-CGCTCTGTGAACCCTGATGAAGATGG-GCTGTCTGAGTA-CTATG-  
AAAATTGTCAAACTTTCAACAATGGATCTCTTGGTTCCGGCATCGATGAAGAACGCAGCGAAATGCGATAAGTAA  
TGTGAATTGCAGAATCCGTGAATCATCGAATCTTTGAACGCACATTGCGCCCCCTGGCATTCCGGGGGGCATGC  
CTGTCCGAGCGTCATTTCTGCCCTCAAGCACGGCTTGTGTGTTGGGCGCGGTCCCCC-GGGGACCTGCCCGAA  
AAGGCAGCGGC-GACGTCCGTCT-GGTCCTCGAGCGTATGGGGCTTGTCACTCG-CTCGGGAAGGACCTGCGG  
GGTTGGTCA

>JN899327\_Talaromyces\_derxii CBS 412.89

CCTCCCACCCTTGTCTCT-CT-CTAC-ACCTGTTGCTTTGGCGGGCCACC-GGGGCCACCCGGTCGCCGGGGGACG--  
-TCGTCCCCGGGCCCGCGCCCGCCGAGG-CGCCCTGTGAACCCTGATGAAGATGG-GCTGTCTGAG-A-TCATG-A  
AAATTGTCAAACTTTCAACAATGGATCTCTTGGTTCCGGCATCGATGAAGAACGCAGCGAAATGCGATAAGTAAT  
GTGAATTGCAGAATCCGTGAATCATCGAATCTTTGAACGCACATTGCGCCCCCTGGCATTCCGGGGGGCATGCC  
TGTCCGAGCGTCATTTCTGCCCTCAAGCACGGCTTGTGTGTTGGGTGTGGTCCCCC-GGGGACCTGCCCGAAA  
GGCAGCGGC-GACGTCCGTCC-GGTCCTCGAGCGTATGGGGCTTGTCACTCG-CTCGGGAAGGACCTGCGGGG  
GTTGGTCA

>JN899342\_Talaromyces\_duclauxii CBS 322.48

CCTCCCACCCGTGTCTCT-CT-CTAC-ACCTGTTGCTTTGGCGGGCCACC-GGGGCCACCCGGTCGCCGGGGGACG-  
--TTGTCCCCGGGCCCGCGCCCGCCGAAG-CGCCCTGTGAACCCTGATGAAGATGG-GCTGTCTGAG-A-TGATG-A  
AAATTGTCAAACTTTCAACAATGGATCTCTTGGTTCCGGCATCGATGAAGAACGCAGCGAAATGCGATAAGTAAT  
GTGAATTGCAGAATCCGTGAATCATCGAATCTTTGAACGCACATTGCGCCCCCTGGCATTCCGGGGGGCATGCC  
TGTCCGAGCGTCATTTCTGCCCTCAAGCACGGCTTGTGTGTTGGGTGTGGTCCCCC--GGGGACCTGCCCGAAA  
GGCAGCGGC-GACGTCCGTCC--GGTCCTCGAGCGTATGGGGCTC-GTCACTCG-CTCGGGAAGGACCTGCGGGG  
GTTGGTCA

>AB176617\_Talaromyces\_euchlorocarpus PF 1203

CCTCCCACCCTTGTCTCT-ATAC-ACCTGTTGCTTTGGCGGGCCACC-GGGGCCACCCGGTCGCCGGGGGACG-  
-TCCGTCCCCGGGCCCGCGCCCGCCGAAG-CGCCCTGTGAACCCTGATGAAGATGG-GCTGTCTGAGTA-CTATG-  
AAAATTGTCAAACTTTCAACAATGGATCTCTTGGTTCCGGCATCGATGAAGAACGCAGCGAAATGCGATAAGTAA  
TGTGAATTGCAGAATCCGTGAATCATCGAATCTTTGAACGCACATTGCGCCCCATGGCATTCCGGGGGGCATGC  
CTGTCCCAGCGTCATTTCTGCCCTCAAGCGCGGCTTGTGTGTTGGGTGCGGTCCCCC-GGGGACCTGCCCGAA  
AAGGCAGCGGC-GACGTCCGTCC-GGTCCTCGAGCGCATGGGGCTTGTCACTCGACTCGGGAAGGACCTGCG  
GGGTTGGTCA

>JN899392\_Talaromyces\_flavovirens CBS 102801

CCTCCCACCCTTGTCTCT-CT-CTAC-ACCTGTTGCTTTGGCGGGCCACC-GGGGCGACCTGGTCGCCGGGGGACG--  
AACGTCCCCGGGCCCGCGCCCGCCGAAG-CGCTCTGTGAACCCTGATGAAGATGG-GCTGTCTGAG-A-CGATG-  
AAAATTGTCAAACTTTCAACAATGGATCTCTTGGTTCCGGCATCGATGAAGAACGCAGCGAAATGCGATAAGTAA  
TGTGAATTGCAGAATCCGTGAATCATCGAATCTTTGAACGCACATTGCGCCCCCTGGCATTCCGGGGGGCATGC  
CTGTCCGAGCGTCATTTCTGCCCTCAAGCACGGCTTGTGTGTTGGGTGTGGTCCCCC-GGGGACCTGCCCGAA



AGGCAGCGGC-GACGTCCGTC--GGTCCTCGAGCGTATGGGGCTT-GTCACTCG-CTCGGGAAGGACCTGCGGGG  
GTTGGTCA

>JN899360\_Talaromyces\_flavus CBS 310.38

CCTCCCACCCTTGTC-CT-ATAC-ACCTGTTGCTTTGGCGGGCCCACC-GGGGCCACCTGGTCGCCGGGGGACG---  
-CGTCTCCGGGCCCCGCGCCCCGCCGAAG-CGCTCTGTGAACCCTGATGAAGATGG-GCTGTCTGAG-A-CTATG-AA  
AATTGTCAAACTTTCAACAATGGATCTCTTGGTTCCGGCATCGATGAAGAACGCAGCGAAATGCGATAAGTAATG  
TGAATTGCAGAATCCGTGAATCATCGAATCTTTGAACGCACATTGCGCCCCCTGGCATTCCGGGGGGCATGCCT  
GTCCGAGCGTCATTTCTGCCCTCAAGCACGGCTTGTGTGTTGGGTGCGGTCCCCC-GGGGACCTGCCCAAAA  
GGCAGCGGC-GACGCCCCTC--GGTCCTCGAGCGTATGGGGCTC-GTCACTCG-CTCGGGAAGGACCTGCGGGG  
GTTGGTCA

>JN899377\_Talaromyces\_funiculosus CBS 272.86

CCTCCCACCCTTGTC-CT-CTAC-ACCTGTTGCTTTGGCGGGCCCACC--GGGGCC-CCTGGTCGCCGGGGGACG---  
CCGTCCCCGGGCCCCGCGCCCCGCCGAAG-CGCTTCGTGAACCCTGATGAAGAAGG-GCTGTCTGAG-A-CTATG-A  
AAATGTCAAACTTTCAACAATGGATCTCTTGGTTCCGGCATCGATGAAGAACGCAGCGAAATGCGATAAGTAAT  
GTGAATTGCAGAATCCGTGAATCATCGAATCTTTGAACGCACATTGCGCCCCCTGGCATTCCGGGGGGCATGCC  
TGTCCGAGCGTCATTTCTGCCCTCAAGCACGGCTTGTGTGTTGGGTGTGGTCCCCC--GGGGACCTGCCGAAA  
GGCAGCGGC-GACGTCCGTC--GGTCCTCGAGCGTATGGGGCTC-GTCACTCG-CTCGGGAAGGACCTGCGGGG  
GTTGGTCA

>JN899358\_Talaromyces\_galapagensis CBS 751.74

CCTCCCACCCTTGTC-CT-ATAC-ACCTGTTGCTTTGGCGGGCCCACC-GGGGCCACCTGGTCGCCGGGGGATA--  
CACGTCCCCGGGCCCCGCGCCCCGCCGAAG-CGCCCTGTGAACCCTGATGAAGATGG-GCTGTCTGAG-A-CTGTG-  
AAAATGGTCAAACTTTCAACAATGGATCTCTTGGTTCCGGCATCGATGAAGAACGCAGCGAAATGCGATAAGTAA  
TGTGAATTGCAGAATCCGTGAATCATCGAATCTTTGAACGCACATTGCGCCCCCTGGCATTCCGGGGGGCATGC  
CTGTCCGAGCGTCATTTCTGCCCTCAAGCACGGCTTGTGTGTTGGGTGTGGTCCCCC-GGGGACCTGCCGAA  
AGGCAGCGGC-GACGTCCGTC--GGTCCTCGAGCGTATGGGGCTC-GTCACTCG-CTCGGACGGACCTGCGGG  
GGTTGGTCA

>JN899331\_Talaromyces\_indigoticus CBS 100534

CCTCCCACCCTTGTC-CT-ATATAACCTGTTGCTTTGGCGGGCCCACC--CTGTGGCCAGGTCGCCGGGGGACG---  
TCGTCCCCGGGCCCCGCGCCCCGCCGAAG-CGCCCTGTGAACCCTGATGAAGATGG--CTGTCTGAGTC-GTATG-AG  
AATCGT-AAACTTTCAACAATGGATCTCTTGGTTCCGGCATCGATGAAGAACGCAGCGAAATGCGATAAGTAATGT  
GAATTGCAGAATCCGTGAATCATCGAATCTTTGAACGCACATTGCGCCCCCTGGCATTCCGGGGGGCATGCCTG  
TCCGAGCGTCATTTCTGCCCTCAAGCACGGCTTGTGTGTTGGGTGTGGTCCCCC-GGGGACCTGCCGAAAG  
GCAGCGGC-GACGTCCGTC--GGTCCTCGAGCGTATGGGGCTT-GTCACTCG-CTCGGGAAGGACCTGCGGGGT  
TGGTCA

>JN899332\_Talaromyces\_intermedius CBS 152.65

CCTCCCACCCTTGTC-CT-ATAC-ACCTGTTGCTTTGGCGGGCCCACC-GGGGCCACCTGGTCGCCGGGGGACG---  
-CGTCCCCGGGCCCCGCGCCCCGCCGAAG-CGCCCTGTGAACCCTGATGAATATGG-GCTGTCTGAG-A-CTATG-AAA  
ATTGTCAAACTTTCAACAATGGATCTCTTGGTTCCGGCATCGATGAAGAACGCAGCGAAATGCGATAAGTAATGT  
GAATTGCAGAATCCGTGAATCATCGAATCTTTGAACGCACATTGCGCCCCCTGGCATTCCGGGGGGCATGCCTG  
TCCGAGCGTCATTTCTGCCCTCAAGCACGGCTTGTGTGTTGGGTGTGGTCCCCC-GGGGACCTGCCGAAAG  
GCAGCGGC-GACGTCCGTC--GGTCCTCGAGCGTATGGGGCTT-GTCACTCG-CTCGGGAAGGACCTGCGGGGT  
TGGTCA

>JN899395\_Talaromyces\_liani CBS 225.66

CCTCCCACCCTTGTCCTCTATAC-ACCTGTTGCTTTGGCGGGCCCACC-GGGGCCACCTGGTCGCCGGGGGACG-

-CACGTCCCCGGGCCCGCGCCCGCCGAAG-CGCGCTGTGAACCCTGATGAAGATGG-GCTGTCTGAG-A-CTATG-  
AAAATTGTCAAAACTTTCAACAATGGATCTCTTGGTTCCGGCATCGATGAAGAACGCAGCGAAATGCGATAAGTAA  
TGTGAATTGCAGAATCCGTGAATCATCGAATCTTTGAACGCACATTGCGCCCCCTGGCATTCCGGGGGGCATGC  
CTGTCCGAGCGTCATTTCTGCCCTCAAGCACGGCTTGTGTGTTGGGTGTGGTCCCCC-GGGGACCTGCCGAA  
AGGCAGCGGC-GACGTCCGTC--GGTCCTCGAGCGTATGGGGCTC-GTCACTCG-CTCGGGAAGGACCTGCGGG  
GGTTGGTCA

>JN899333\_Talaromyces\_macrosporus CBS 317.63

CCTCCCACCCTTGTC-CT-ATAC-ACCTGTTGCTTTGGCGGGCCCACTGGGGGCCCTTGGTCGCCGGGGGACA--  
TCCGTCCCCGGGCCCGCGCCCGCCGAAG-CGCTCTGTGAACCCTGATGAAGATGG-GCTGTCTGAG-A-TTATG-A  
AAATTGTCAAAACTTTCAACAATGGATCTCTTGGTTCCGGCATCGATGAAGAACGCAGCGAAATGCGATAAGTAAT  
GTGAATTGCAGAATCCGTGAATCATCGAATCTTTGAACGCACATTGCGCCCCCTGGCATTCCGGGGGGCATGCC  
TGTCCGAGCGTCATTTCTGCCCTCAAGCACGGCTTGTGTTGGGTGTGGTCCCCC-GGGGACCTGCCGAAA  
GGCAGCGGC-GACGTCCGTC--GGTCCTCGAGCGTATGGGGCTC-GTCACTCG-CTCGGGAAGGACCTGCGGGG  
GTTGGTCA

>JN899344\_Talaromyces\_marneffeii CBS 388.87

CCTCCCACCCTTGTC-CT-ATAC-ACCTGTTGCTTTGGCGGGCCCACTGGGGGCCCTTGGTCGCCGGGGGACG--  
-TTGTCCCCGGGCCCGCGCCCGCCGAAG-CGCCCTGTGAACCCTGATGAAGATGG-ACTGTCTGAG-A-CCATG-A  
AAATTGTCAAAACTTTCAACAATGGATCTCTTGGTTCCGGCATCGATGAAGAACGCAGCGAAATGCGATAAGTAAT  
GTGAATTGCAGAATCCGTGAATCATCGAATCTTTGAACGCACATTGCGCCCCCTGGCATTCCGGGGGGCATGCC  
TGTCCGAGCGTCATTTCTGCCCTCAAGCACGGCTTGTGTGTTGGGTGTGGTCCCTCC-GGGGACCTGCCGAAA  
GGCAGCGGC-GACGTCCGTC--GGTCCTCGAGCGTATGGGGCTC-GTCACTCG-CTCGGGAAGGACCTGCGGGG  
GTTGGTCA

>JN899351\_Talaromyces\_muroii CBS 756.96

CCTCCCACCCTTGTCGTTTATA--ACCTGTTGCTTTGGCGGGCCCACTGGGGGCCCTTGGTCGCCGGGGGACA--  
--CGTCCCCGGGCCCGTGCCTCCGAAG-CGCCCTAGAACTCTGGTGAAGCTAG-GCTGTCTGAGC--TTATG-AA  
AATAGT-AAAACTTTCAACAATGGATCTCTTGGTTCCGGCATCGATGAAGAACGCAGCGAAATGCGATAAGTAATGT  
GAATTGCAGAATCCGTGAATCATCGAATCTTTGAACGCACATTGCGCCCCCTGGCATTCCGGGGGGCATGCCTG  
TCCGAGCGTCATTTCTGCCCTCAAGCGCGCTTGTGTGTTGGGTGTGGTCCCCC-GGGGACCTGCCGAAAAG  
GCAGCGGC-GACGTCCGTCG-GGTCCTCGAGCGCATGGGGCTT-GTCACTCG-CTCGGGAGGGACCCGCGGGG  
GTTGGTCA

>KJ775720\_Talaromyces\_oumae-annae CBS 138208

CCTCCCACCCTTGTCCT-ACAC-ACCTGTTGCTTTGGCGGGCCCACTGGGGGCCCTTGGTCGCCGGGGGACG  
GTTTCGTCCCCGGGCCCGCGCCCGCCGAAG-CGCCCTGTGAACCCTGATGAAGATGG-GCTGTCTGAGTA-CTAT  
G-AAATTGTCAAAACTTTCAACAATGGATCTCTTGGTTCCGGCATCGATGAAGAACGCAGCGAAATGCGATAAGT  
AATGTGAATTGCAGAATCCGTGAATCATCGAATCTTTGAACGCACATTGCGCCCCCTGGCATTCCGGGGGGCAT  
GCCTGTCCGAGCGTCATTTCTGCCCTCAAGCACGGCTTGTGTGTTGGGTGCGGTCCCCC-GGGGACCTGCC  
GAAAGGCAGCGGC-GACGTCCGTCG-GGTCCTCGAGCGTATGGGGCTTGTCACTCG-CTCGGGAGGGACCCGCGGGG  
GGGGTTGGTCA

>JN899362\_Talaromyces\_panamensis CBS 128.89

CCTCCCACCCTTGTC-CT-ACAC-ACCTGTTGCTTTGGCGGGCCCACTGGGGGCCCTTGGTCGCCGGGGGACG-  
---CGTCCCCGGGCCCGCGCCCGCCGAAG-CGCCCTGTGAACCCTGATGAAGATGG-GCTGTCTGAG-A-CGATG-A  
AAATTGTCAAAACTTTCAACAATGGATCTCTTGGTTCCGGCATCGATGAAGAACGCAGCGAAATGCGATAAGTAAT  
GTGAATTGCAGAATCCGTGAATCATCGAATCTTTGAACGCACATTGCGCCCCCTGGCATTCCGGGGGGCATGCC  
TGTCCGAGCGTCATTTCTGCCCTCAAGCACGGCTTGTGTGTTGGGTGCGGTCCCCC-GGGGACCTGCCGAAA

GGCAGCGGC-GACGCCCGTC--GGTCCTCGAGCGCATGGGGCTT-GTCACTCG-CTCGGGATGGACCTGCGGGG  
GTTGGTCA

>AB176603\_Talaromyces\_paucisporus PF 1150

CCTCCCACCCTTGTCTCT-ATAC-ACCTGTTGCTTTGGCGGGGCCACC-GGGGTCACCTGGTCGCCGGGGGACG--  
CACGTCCCCGGGCCCGCGCCCGCCGAAG-CGCTCTGTGAACCCTGATGAAGATGG-GCTGTCTGAGTA-CGATG-  
AAAATCGTCAAACTTTCAACAATGGATCTCTTGGTTCCGGCATCGATGAAGAACGCAGCGAAATGCGATAAGTAA  
TGTGAATTGCANAATCCGTGAATCATCGAATCTTTGAACGCACATTGCGCCCCCTGGCATTCCGGGGGGCATGC  
CTGTCCGAGCGTCATTTCTGCCCTCAAGCACGGCTTGTGTGTTGGGTGTGGTCCCCC-GGGGACCTGCCCGAA  
AGGCAGCGGCGGACGTCCGTCT-GGTCCTCGAGCGCATGGGGCTCTGTCACTCG-CTCGGGAAGGACCTGCGG  
GGGTTGGTCA

>JN899382\_Talaromyces\_pinophilus CBS 631.66

CCTCCCACCCTTGTCTCT-CT-ATAC-ACCTGTTGCTTTGGCGGGGCCACC-GGGGCCACCTGGTCGCCGGGGGACG--  
CACGTCTCCGGGCCCGCGCCCGCCGAAG-CGCTCTGTGAACCCTGATGAAGATGG-GCTGTCTGAG-A-CTGTG-  
AAAATTGTCAAACTTTCAACAATGGATCTCTTGGTTCCGGCATCGATGAAGAACGCAGCGAAATGCGATAAGTAA  
TGTGAATTGCAGAATCCGTGAATCATCGAATCTTTGAACGCACATTGCGCCCCCTGGCATTCCGGGGGGCATGC  
CTGTCCGAGCGTCATTTCTGCCCTCAAGCACGGCTTGTGTGTTGGGTGTGGTCCCCC-GGGGACCTGCCCGAA  
AGGCAGCGGC-GACGTCCGTC--GGTCCTCGAGCGTATGGGGCTC-GTCACTCG-CTCGGGAAGGACCTGCGGG  
GTTGGTCA

>JN899317\_Talaromyces\_primulinus CBS 321.48

CCTCCCACCCTTGTCTCT-CTAC-ACCTGTTGCTTTGGCGGGGCCACC-GGGGCCACCCGGTCGCCGGGGGACG-  
-CTCGTCCCCGGGCCCGCGCCCGCCGAAG-CGCCCTGTGAACCCTGATGAAGATGG-GCTGTCTGAGTA-TTATG-  
AAAATTGTCAAACTTTCAACAATGGATCTCTTGGTTCCGGCATCGATGAAGAACGCAGCGAAATGCGATAAGTAA  
TGTGAATTGCAGAATCCGTGAATCATCGAATCTTTGAACGCACATTGCGCCCCCTGGCATTCCGGGGGGCATGC  
CTGTCCGAGCGTCATTTCTGCCCTCAAGCGCGGCTTGTGTGTTGGGTGCGGTCCCCC-GGGGACCTGCCCGA  
AAGGCAGCGGC-GACGTCCGTCC-GGTCCTCGAGCGTATGGGGCTTTGTCACTCG-CTCGGGAAGGACCTGCGG  
GGGTTGGTCA

>JN899372\_Talaromyces\_purpurogenus CBS 286.36

CCTCCCACCCTTGTCCCA---AC-ACCTGTTGCTTCGGCGGGGCCACC-GGGGCCACCCGGTCGCCGGGGGACA--  
-TCCGTCCCCGGGCCCGCGCCCGCCGAGG-CGCTCTGTGAACCCTGATGAAGATGG-GCTGTCTGAG-G-ATATG-A  
AAATTGTCAAACTTTCAACAATGGATCTCTTGGTTCCGGCATCGATGAAGAACGCAGCGAAATGCGATAAGTAA  
GTGAATTGCAGAATCCGTGAATCATCGAATCTTTGAACGCACATTGCGCCCCCTGGCATTCCGGGGGGCATGCC  
TGTCCGAGCGTCATTTCTGCCCTCAAGCACGGCTTGTGTGTTGGGTGTGGT-CCCCC-GGGGACCTGCCCGAAA  
GGCAGCGGC-GACGTCCGTC--GGTCCTCGAGCGTATGGGGCTC-GTCACTCG-CTCGGGAAGGACCTGCGGGG  
GTTGGTCA

>JX315662\_Talaromyces\_ruber CBS 132704

CCTCCCACCCTTGTCTCT-ATAC-ACCTGTTGCTTTGGCGGGGCCACC-GGGGTCACCTGGTCGCCGGGGGACAA  
-TCTGTCCCCGGGCCCGCGCCCGCCGAAG-CGCTCTGTGAACCCTGATGAAGATGG-GCTGTCTGAGTA-CTATG-  
AAAATTGTCAAACTTTCAACAATGGATCTCTTGGTTCCGGCATCGATGAAGAACGCAGCGAAATGCGATAAGTAA  
TGTGAATTGCAGAATCCGTGAATCATCGAATCTTTGAACGCACATTGCGCCCCCTGGCATTCCGGGGGGCATGC  
CTGTCCGAGCGTCATTTCTGCCCTCAAGCACGGCTTGTGTGTTGGGTGCGGTCCCCC-GGGGACCTGCCCGAA  
AAGGCAGCGGC-GACGTCCGTCT-GGTCCTCGAGCGTATGGGGCTTTGTCACTCG-CTCGGGAAGGGCTGGCGG  
GGGTTGGTCA

>JN899384\_Talaromyces\_rubicundus CBS 342.59

CCTCCCACCCTTGTCTCT-CT-ATA--ACCTGTTGCTTTGGCGGGGCCACC-GTGA-----GGTCGCCGGGGGACG--AACG

TCCCCGGGCCCGCGCCCGCCGAAG-CGCCCTGTGAACCCTGATGAAGATGG-GCTGTCTGAG---GTACG-AAAAT  
CGTCAAAACTTTCAACAATGGATCTCTTGGTTCCGGCATCGATGAAGAACGCAGCGAAATGCGATAAGTAATGTGA  
ATTGCAGAATTCCGTGAATCATCGAATCTTTGAACGCACATTGCGCCCCCTGGCATTCCGGGGGGGCATGCCTGTC  
CGAGCGTCATTTCTGCCCTCAAGCACGGCTTGTGTGTTGGGTGTGGTCCCCCC-GGGGACCTGCCGAAAGGC  
AGCGGC-GACGTCCGTC--GGTCTCGAGCGTATGGGGCTC-GTCACTCG-CTCGGGAAGGACCTGCGGGGGTTG  
GTCA

>KJ775713\_Talaromyces\_sayulitensis CBS 138204

CCTCCCACCCTTGTCTCTAATAC-ACCTGTTGCTTTGGCGGGCCACC-GGGGCCACCTGGTCGCCGGGGGACG-  
-CACGTCCCCGGGCCCGCGCCCGCCGAAG-CGCTCTGTGAACCCTGATGAAGATGG-GCTGTCTGAGTA-CTGTG  
AAAAATTGTCAAAACTTTCAACAATGGATCTCTTGGTTCCGGCATCGATGAAGAACGCAGCGAAATGCGATAAGTA  
ATGTGAATTGCAGAATTCCGTGAATCATCGAATCTTTGAACGCACATTGCGCCCCCTGGCATTCCGGGGGGGCATG  
CCTGTCCGAGCGTCATTTCTGCCCTCAAGCACGGCTTGTGTGTTGGGTGTGGTCCCCCC-GGGGACCTGCCGAA  
AAGGCAGCGGC-GACGTCCGTC--GGTCTCGAGCGTATGGGGCTC-GTCACTCG-CTCGGGAAGGACCTGCGG  
GGTTGGTCA

>JN899385\_Talaromyces\_siamensis CBS 475.88

CCTCCCACCCTTGTCT-CT-ATAC-ACCCGTTGCTTTGGCGGGCCACC-GGGGCCACCTGGTCGCCGGGGGACG--  
TCCGTCCCCGGGCCCGCGCCCGCCGAAG-CGCTCTGTGAACCCTGATGAAGATGG-GCTGTCTGAG-A-CTATG-A  
AAATTGTCAAAACTTTCAACAATGGATCTCTTGGTTCCGGCATCGATGAAGAACGCAGCGAAATGCGATAAGTAAT  
GTGAATTGCAGAATTCCGTGAATCATCGAATCTTTGAACGCACATTGCGCCCCCTGGCATTCCGGGGGGGCATGCC  
TGTCCGAGCGTCATTTCTGCCCTCAAGCACGGCTTGTGTGTTGGGTGCGGTCCCCCC-GGGGACCTGCCGAAA  
GGCAGCGGC-GACGTCCGTC--GGTCTCGAGCGTATGGGGCTC-GTCACTCG-CTCGGGAAGGACCTGCGGGG  
GTTGGTCA

>JN899348\_Talaromyces\_stipitatus CBS 375.48

CCTCCCACCCTTGTCC---ATA--ACCTGTTGCTTTGGCGGGCCACC-GGGA--ACCTGGTCGCCGGGGGACG---TC  
GTCCCCGGGCCCGCGCCCGCCGAGG-CGCCCTTTGAACCCTGATGAAGATGG-GCTGTCTGAG-G-ATATG-AAAA  
TTGTCAAAACTTTCAACAACGAATCTCTTGGTTCCGGCATCGATGAAGAACGCAGCGAAATGCGATAAGTAATGTG  
AATTGCAGAATTCCGTGAATCATCGAATCTTTGAACGCACATTGCGCCCCCTGGCATTCCGGGGGGGCATGCCTGT  
CCGAGCGTCATTTCTGCCCTCAAGCACGGCTTGTGTGTTGGGTGCGGTCCCCCC-GGGGACCTGCCGAAAGG  
CAGCGGC-GACGTCCGTC--GGTCTCGAGCGTATGGGGCTC-GTCACTCG-CTCGGGAAGGACCTGCGGGGGTT  
GGTCA

>JX315674\_Talaromyces\_stollii CBS 408.93

CCTCCCACCCTTGTCTCT-ATAC-ACCTGTTGCTTTGGCGGGCCACC-GGGGCCACCTGGTCGCCGGGGGACG--  
TTGTCGCCCGGGGCCCGCGCCCGCCGAAG-CGCTCTGTGAACCCTGATGAAGATGG-GCTGTCTGAGTA-CTATG-A  
AAATTGTCAAAACTTTCAACAATGGATCTCTTGGTTCCGGCATCGATGAAGAACGCAGCGAAATGCGATAAGTAAT  
GTGAATTGCAGAATTCCGTGAATCATCGAATCTTTGAACGCACATTGCGCCCCCTGGCATTCCGGGGGGGCATGCC  
TGTCCGAGCGTCATTTCTGCCCTCAAGCACGGCTTGTGTGTTGGGTGCGGTCCCCCC-GGGGGCCTGCCGAA  
AGGCAGCGGC-GACGTCCGTC--GGTCTCGAGCGTATGGGGCTTGTCACTCG-CTCGGGAAGGACTGCGGGG  
GGTTGGTCA

>JX898041\_Talaromyces\_thailandensis CBS 133147

CCTCCCACCCTTGTCTCT-ATAC-ACCTGTTGCTTTGGCGGGCCACC-GGGGCCACCCGGTCGCCGGGGGACG-  
-CTCGTCCCCGGGCCCGCGCCCGCCGAAG-CGCTCTAAGAACCCTGATGAAGATGG-GCTGTCTGAGTA-CTATG-  
AAAATTGTCAAAACTTTCAACAATGGATCTCTTGGTTCCGGCATCGATGAAGAACGCAGCGAAATGCGATAAGTAA  
TGTGAATTGCAGAATTCCGTGAATCATCGAATCTTTGAACGCACATTGCGCCCCCTGGCATTCCGGGGGGGCATGC  
CTGTCCGAGCGTCATTTCTGCCCTCAAGCACGGCTTGTGTGTTGGGTGTGGTCCCCCC-GGGGACCTGCCGAA

AGGCAGCGGC-GACGTCCGTCT-GGTCCTCGAGCGTATGGGGCTTTGTCACTCG-CTCGGGAAGGACCTGCGGG  
GTTGGTCA

>KF741994\_Talaromyces\_verruculosus CBS 388.48

CCTCCCACCCTTGTCTCT-ATAC-ACCTGTTGCTTTGGCGGGGCCACC-GGGGCCACCTGGTCGCCGGGGGACG--  
-TCGTCTCCGGGCCCGCGCCCGCCGAAG-CGCTCTGTGAACCCTGATGAAGATGG-GCTGTCTGAGTA-CTATG-A  
AAATTGTCAAACTTTCAACAATGGATCTCTTGGTTCCGGCATCGATGAAGAACGCAGCGAAATGCGATAAGTAAT  
GTGAATTGCAGAATCCGTGAATCATCGAATCTTTGAACGCACATTGCGCCCCCTGGCATTCCGGGGGGCATGCC  
TGTCCGAGCGTCATTTCTGCCCTCAAGCACGGCTTGTGTGTTGGGTGCGGTCCCCCC-GGGGACCTGCCCGAAA  
GGCAGCGGC-GACGTCCGTCT-GGTCCTCGAGCGTATGGGGCTCTGTCACTCG-CTCGGGACGGACCTGCGGGG  
GTTGGTCA

>AF285782\_Talaromyces\_viridis CBS 114.72

TCTCCCACCCTTGTCTCT-CTAT-ACCTGTTGCTTCGGCGGGGCCACC-GGGACA--CTGGTCGCCGGGGGACG--T  
CCGTCCCCGGGGCCCGCGCCCGCCGAAGCCCCCTGTGAACCCTGATGAATATGGAGCTGTCTGAGTATCAATG-  
AAAATCGTCAAACTTTCAACAATGGATCTCTTGGTTCCGGCATCGATGAAGAACGCAGCGAAATGCGATAAGTAA  
TGTGAATTGCAGAATCCGTGAATCATCGAATCTTTGAACGCACATTGCGCCCCCTGGCATTCCGGGGGGCATGC  
CTGTCCGAGCGTCATTTCTGCCCTCAAGCGCGGCTTGTGTGTTGGGTGCGGTCCCCCC-GGGGACCCGCCCGA  
AAGGCAGCGGC-GACGCCCGTCC-GGTCCTCGAGCGCATGGGGCTCTGTACCCG-CTCGGGAAGGACCCGCG  
GGGGTTGGTCA

>JN899314\_Talaromyces\_viridulus CBS 252.87

CCTCCCACCCTTGTCTCT-ATAC-ACCTGTTGCTTTGGCGGGGCCACC-GGGGCCACCTGGTCGCCGGGGGACG--  
TTCGTCCCCGGGGCCCGCGCCCGCCGAAG-CGCCCTGTGAACCCTGATGAAGATGG-GCTGTCTGAGTA-CGATG-  
AAAATTGTCAAACTTTCAACAATGGATCTCTTGGTTCCGGCATCGATGAAGAACGCAGCGAAATGCGATAAGTAA  
TGTGAATTGCAGAATCCGTGAATCATCGAATCTTTGAACGCACATTGCGCCCCCTGGCATTCCGGGGGGCATGC  
CTGTCCGAGCGTCATTTCTGCCCTCAAGCACGGCTTGTGTGTTGGGTGCGGTCCCCCC-GGGGACCTGCCCGAA  
AGGCAGCGGC-GACGTCCGTCTG-GGTCCTCGAGCGCATGGGGCTTTGTCACTCG-CTCGGGAAGGACCTGCGG  
GGGGTTGGTCA

>KP765384\_Talaromyces\_qii\_AS3.15414

CCTCCCACCCTTGTCTCT-ATAT-ACCTGTTGCTTTGGCGGGGCCACC-GGGGCCACCCGGTCGCCGGGGGACG--  
CTCGTCCCCGGGGCCCGCGCCCGCCGAAG-CGCTCTAAGAACCCTGATGAAGATGG-GCTGTCTGAGTA-ATTTG-A  
AAATTGTCAAACTTTCAACAATGGATCTCTTGGTTCCGGCATCGATGAAGAACGCAGCGAAATGCGATAAGTAAT  
GTGAATTGCAGAATCCGTGAATCATCGAATCTTTGAACGCACATTGCGCCCCCTGGCATTCCGGGGGGCATGCC  
TGTCCGAGCGTCATTTCTGCCCTCAAGCACGGCTTGTGTGTTGGGTGCGGTCCCTCC-GGGGACCTGCCCGAAA  
GGCAGCGGC-GACGTCCGTCTG-GGTCCTCGAGCGCATGGGGCTTTGTCACTCG-CTCGGGAAGGACCTGCGGG  
GTTGGTCA

>KP765385\_Talaromyces\_fusisporus\_AS3.15415

CCTCCCACCCTTGTCTCT-ATAC-ACCTGTTGCTTTGGCGGGGCCACCAGGGGCTCACCTGGTCGCCGGGGGACG-  
-TCTGTCCCCGGGGCCCGCGCCCGCCGAAG-CGCTCTGAGAACCCTGATGAAGATGG-GCTGTCTGAGTA-CTATG-  
AAAATTGTCAAACTTTCAACAATGGATCTCTTGGTTCCGGCATCGATGAAGAACGCAGCGAAATGCGATAAGTAA  
TGTGAATTGCAGAATCCGTGAATCATCGAATCTTTGAACGCACATTGCGCCCCCTGGCATTCCGGGGGGCATGC  
CTGTCCGAGCGTCATTTCTGCCCTCAAGCGCGGCTTGTGTGTTGGGTGCGGTCCCCCC-GGGGACCTGCCCGA  
AAGGCAGCGGC-GACGTCCGTTTGGGTCTCGAGCGTATGGGGCTTTGTCACTCG-CTCGGGACGGACCCGCG  
GGGGTTGGTCA

>JN8993591\_Talaromyces\_helicus\_CBS 335.48I

CCTCCCACCCGTGCCGTT-ATAATACCTGTTGCTTTGGCGGGGCCACC--GGGG-CACCTGGTCGCTGGGGGACG---

CCGTCCCCGGGCCCCGCGCCCGCCGAAG-CACCCCCTGAACTCTGAAGAAGATAGGGCTGTCTGAG-A-CCTAG-A  
AAATTGTCAAACTTTCAACAATGGATCTCTTGTTCCGGCATCGATGAAGAACGCAGCGAAATGCGATAAGTAAT  
GTGAATTGCAGAATCCGTGAATCATCGAATCTTTGAACGCACATTGCGCCCCCTGGCATTCCGGGGGGCATGCC  
TGTCCGAGCGTCATTTCTGCCCTCAAGCACGGCTTGTGTGTTGGGTGTGGTCCCCCGGGGGACCTGCCCCAA  
AGGCAGCGGC-GACGCCCCGTCG-GGCCTCGAGCGCATGGGGCTT-GTCACTTG-CTCGGGAGGGACCTGCGGG  
GGTTGGTCA

Data S3. The sequence alignment of *ITS1-5.8S-ITS2*.

#### Supplementary dataset 4

>Talaromyces\_aculeatus\_CBS\_289.48CaMBenAITS

TG-GATATCTAT-TTGTG-----GCA----ATGTTG---TGGT-GGGTGGTT-AGCTGACTA---CG---GTT-----TGATG-AG  
TAGGACAAGGATGGAGATGGTGAGT-----CCGC-----CACGAA--CAATAACC-AAAAGACCTTGA-CCGA  
AGG-----TGATC-GCA-----ACGGACA-AATATTGA-----TAAAATT-GAATAGGCCAAATCACAAACCAAGGAAGTGG  
GCACCGTCATGCGCTCTCTCGGCCAGAACCCCTCCGAATCCGAATTGCAGGACATGATCAACGAAGTCGACGCT  
GACAACAACGGCACAATCGATTTCCTGGTATGCTATA-----AATCCTTACGGGT-TATTA-----CGA-----TGG  
CGG---T-ACTAACTGC--T-G---CAGAATTCTTGACAATGATGGCCCGCAAATGAAGGATACCGACTCCGAGGAAGA  
GATCCGCGAGGCTTTCAAGGTGTTTGACCGTGACAACAATGNGTGAGTTTG-ACTCTCG-AC--CCA-----AGCTTTC  
-TATCAATTGTCGCGAC-AACACGCTGACT-----CT-TTCCAGGCAAATCATCTCTGCTGAGCATGGTCTCGATGGCT  
CTGGTGTGTAA-----GTA-TC---CATGA-ATGG-AATCCAGCTACAATCCGACA--A-TATCTGA-TAATCAACAGCTAC  
AATGGCTCCTCTGACCTCCAGTTGGAGCGTATGAACGTCTACTTCAACGAGGTGCGTCG-----AAC-----CAA  
T-CCACCAAAT--AACGA-A--ACAAA-----CTCAC-A--ATGG-----TATAGGCCTCCGGCAACAAATACGTCCCC  
GTGCTGTCTCGTTCGACTTGGAGCCCGGNCCTCCCACCTTGTCT-CTATAC-ACCTGTTGCTTTGGCGGGCCCA  
CC-GGGGCCACCTGGTCGCGGGGGAC-G-CACGTCCCCGGGCCCGCGCCCGCCGAAG-CGCTCTGTGAACCC  
TGATGAAGATGG-GCTGTCTGAGTA-GTATG-AAAATTGTCAAACCTTTCAACAATGGATCTCTTGGTTCCGGCATCG  
ATGAAGAACGCAGCGAAATGCGATAAGTAATGTAATTGCAGAATTCCGTGAATCATCGAATCTTTGAACGCACAT  
TGCGCCCCCTGGCATTCCGGGGGGCATGCCTGTCCGAGCGTCATTTCTGCCCTCAAGCACGGCTTGTGTGTTG  
GGTGCGGTCCCCC-GGGGACCTGCCCGAAAGGCAGCGGCGACGTCCGTCT-GGTCCTCGAGCGTATGGGGCT  
TTGTCACTCG-CTCGGGAAGGACTGCGGGGGTTGGTCA

>Talaromyces\_amestolkiae\_CBS\_132696

TG-GAAACTTGGTTTGTG-----ACA----ATGTTG---GC-----GTGGTT-AGCTGACCAG-CCG---TTT-----TGATG-AA  
TAGGACAAGGATGGAGATGGTGAGT-----CGC-----CGCGAA--CAATAA-----AACACCTTGA-ACGAAC  
G-----TTACC-GCA-----GCCAACA-GACATTGA-----CCCTATC-GGACAGGACAAATCACAAACCAAGGAAGTGG  
GCACAGTCATGCGTTCTCTCGGCCAGAACCCCTCCGAATCCGAATTGCAGGACATGATCAACGAAGTCGACGCT  
GACAACAACGGCACAATGATTTCCTGGTATGACTGA-----CCACCAAC-TCGCAATATTGA-----TG  
GCAG---T-ACTGACTGC--C-G---CAGAATTCTTGACAATGATGGCCCGCAAATGAAGGATACCGACTCCGAGGAA  
GAGATCCGTGAGGCTTTCAAGGTGTTTGATCGTGACAACAATGNGTGAGTTTG-A--CTCG-TC--CCA-----AGC-TA  
C-TATCAATTGTCGCGAC-AGCACGCTGACT-----T-ATCCAGGCAAATCATCTCTGCTGAGCACGGTCTCGATGGC  
TCTGGTGTGTAA-----GTA-TT--TCACAG-TTCG-AATACACCTACAGTCCGACA--A-CATCTGA-TCATCGACAGCTA  
CAATGGCTCCTCCGACCTCCAGTTGGAGCGTATGAACGTCTACTTCAACGAGGTGCGTTA-----GAAA----GT  
CTC-TCGACTCCT---ATAG-A---ACAGA-----CACTC-A--TTCA-----TC-TAGGCCTCCGGCAACAAATACGTCCCC  
CGTGCCGTCTCGTATTTGGAGCCCGGNCCTCCCACCTTGTCT-CTATAC-ACCTGTTGCTTTGGCGGGCCC  
ACC-GGGGCCACCTGGTCGCGGGGGAC-A-TCTGTCCCCGGGCCCGCGCCCGCCGAAG-CGCTCTGTGAACCC  
TGATGAAGATGG-GCTGTCTGAGTA-CTATG-AAAATTGTCAAACCTTTCAACAATGGATCTCTTGGTTCCGGCATCG  
ATGAAGAACGCAGCGAAATGCGATAAGTAATGTAATTGCAGAATTCCGTGAATCATCGAATCTTTGAACGCACAT  
TGCGCCCCCTGGCATTCCGGGGGGCATGCCTGTCCGAGCGTCATTTCTGCCCTCAAGCACGGCTTGTGTGTTG  
GGTGCGGTCCCCC-GGGGACCTGCCCGAAAGGCAGCGGCGACGTCCGTCT-GGTCCTCGAGCGTATGGGGCT  
TTGTCACTCG-CTCGGGAAGGACTGCGGGGGTTGGTCA

>Talaromyces\_angelicus\_KACC\_46611

TG-GATTTCCAC-TTGTG-----GTA----ATGGTG-----GGTGGTT-AGCTGACTAG--CG---TTT-----TGATG-AGTA  
GGACAAGGATGGAGATGGTGAGT-----CCGC-----CACGAA--CGATAACC-AAAAGACCTTGA-ACAAAG  
G-----TTATC-GCT-----ACGAACA-GATATTGA-----CTATATC-GAATAGGCCAAATCACGACCAAGGAAGTGGGC

ACCGTCATGCGTTCCCTCGGCCAGAACCCCTCCGAATCCGAATTGCAGGACATGATCAACGAAGTCGACGCTGA  
CAACAACGGCACAATCGATTTTCTGGTATGATATA-----ATTGCTTACGGTT-TACTA----CGA-----TGGCA  
G----T-ACTAACTGC--C-G---CAGAATTCTTGACAATGATGGCCCCGAAAATGAAGGATACCGACTCCGAGGAAGAGA  
TCCGCGAGGCTTTCAAGGTGTTTGACCGCGACAACAATGNGTGAGTTTT-A--CTCG-AC--CCG-----AACTTTC-TAT  
CAATTGTGCGGAC-AACACGCTGACT-----T-TTCCAGGCAAATCATCTCTGCTGAGCACGGTCTCGATGGCTCTG  
GTGTGTAA-----GTA-TT--ACATGA-TTCG-ATTCCAGCTACAATCCAACA--A-TATCTGA-TCATCAACAGCTACAAT  
GGCTCCTCCGACCTCCAGTTGGAGCGTATGAACGTCTACTTCAACGAGGTGCGTCA-----GAC----GATT-C  
CACCATAT--AAACAA-A--ACAAA-----ACTCAT----CGG-----GTATAGCCTCCGGCAACAAATACGTTCCCGTG  
CTGTCTCGTGCAGTTGGAGCCCGGNCCTCCCACCCTTGTCT-CTCTAC-ACCTGTTGCTTTGGCGGGCCACC-  
GGGGCCACCTGGTCGCCGGGGGAC-G-CACGTCCCCGGGCCGCGCCCGCCGAAG-CGCTCTGTGAACCCTGA  
TGAAGATGG-GCTGTCTGAGTA-CGATG-AAAATTGTCAAACTTTCAACAATGGATCTCTTGGTTCCGGCATCGAT  
GAAGAACGCAGCGAAATGCGATAAGTAATGTGAATTGCAGAATCCGTGAATCATCGAATCTTTGAACGCACATTG  
CGCCCCCTGGCATTCCGGGGGGCATGCCTGTCCGAGCGTCATTTCTGCCCTCAAGCACGGCTTGTGTGTTGGG  
TGTGGTCCCCC-GGGGACCTGCCGAAAGGCAGCGGCGACGTCCGTCT-GGTCCTCGAGCGTATGGGGCTCT  
GTCACTCG-CTCGGAAGGACCTGCGGGGGTTGGTCA

>Talaromyces\_apiculatus\_CBS\_312.59

TG-GATATCTAT-TTGTG-----GCA----ATGTTG---CCGT-GGGTGGTT-AGCTGACTAG--CG---GCT-----TGATG-A  
GTAGGACAAGGATGGAGATGGTGAAGT-----CCGC----CATGAA--CAATAACC-AAGAGACCTTGA-ACA  
TAGG-----TGATC-GCA-----ACGAACA-AGTATTGA-----TAAATC-GAATAGGCCAAATCACAACCAAGGAACTG  
GGCACCCTCATGCGTTCTCTCGGCCAGAACCCCTCCGAATCCGAATTACAGGACATGATCAATGAGGTCGACGC  
TGACAACAACGGCACAATCGATTTCCCTGGTATGATATA-----ATTGCTTACGGGT-TATTA----CGA-----CG  
GCAG----T-GCTAACTGC--C-G---CAGAATTCTTGACAATGATGGCCCCGAAAATGAAGGATACCGACTCCGAGGAA  
GAGATCCGCGAGGCTTTCAAGGTGTTTGACCGTGACAACAATGNGTGAGTTTG-ACACTCG-ACA-CCA-----AGCT  
TTC-TATCAGTTGTGCGGTC-AACACGCTGACTC-----TG-TCCCAGGCAAATCATCTCTGCTGAGCACGGTCTCGAT  
GGCTCCGGTGTGTAA-----GTA-TC---CACGG-TTCG-AATCCAGGTACAATTCGACA--A-TATCTAA-TAATCAACAG  
CTACAATGGCTCCTCTGACCTCCAGTTGGAGCGTATGAACGTCTACTTCAACGAAGTGCCTCG-----AAAC--  
---CAAT-CCACCATAT---AACGA-A--ACAAA-----CTCAC-A--GTGG-----TATAGCCTCCGGCAACAAATACGTC  
CCCCGTGCTGTCTGGTGCAGTTGGAGCCCGGNCCTCCCACCCTTGTG--CTATAC-ACCTGTTGCTTTGGCGGG  
CCCACC-GGGGCCACCTGGTCGCCGGGGGAC-G-CACGTCCCCGGGCCGCGCCCGCCGAAG-CGCTCTGTGA  
ACCCTGATGAAGATGG-GCTGTCTGAG-A-TTATG-AAAATTGTCAAACTTTCAACAATGGATCTCTTGGTTCCGGC  
ATCGATGAAGAACGCAGCGAAATGCGATAAGTAATGTGAATTGCAGAATCCGTGAATCATCGAATCTTTGAACGC  
ACATTGCGCCCCCTGGCATTCCGGGGGGCATGCCTGTCCGAGCGTCATTTCTGCCCTCAAGCACGGCTTGTGTG  
TTGGGTGTGGTCCCCC-GGGGACCTGCCGAAAGGCAGCGGCGACGTCCGTG--GGTCCTCGAGCGTATGGG  
GCTT-GTCACTCG-CTCGGAAGGACCTGCGGGGGTTGGTCA

>Talaromyces\_aurantiacus\_CBS\_314.59

TGAAATATCTTC-CTGTC-----GCATAGTATTTTC---TCGT-----TGCTTACAGA-ATG---TTT-----TAATGAAATA  
GGACAAGGATGGAGATGGTGAAGT-----GACGAC-----TGCGACA-CACCAACG-ATGTGCTATCGA-AAGC  
AGATTCAT--CTACGATCT-----ACGAATA-AATATTGA-----TAGAGTC-GGACAGGTCAAATCACAACCAAGGAAC  
TGGGCACCCTCATGCGTTCCCTCGGCCAGAACCCCTCCGAATCCGAATTGCAAGACATGATCAACGAAGTTGAC  
GCTGACAACAACGGCACAATTGATTTCCCTGGTACGATC-----ATCACGCCGCAAC----CTGCTTTCAA-----  
--TGAAA---A-ACTGACCGC--C-G---CAGAATTCTTGACCATGATGGCCCCGAAAATGAAGGATACCGACTCCGAG  
GAAGAGATCCGCGAGGCTTTCAAGGTGTTTGACCGCGACAACAACGNGTGTAATA-----AAA-----GACTT---  
GGTCAATTGTGCCACAAAAAAGCTGAAT-----T-TTCTAGGCAAATCATCTCTGCTGAGCACGGTCTCGATGGCTC  
CGGTGTGTAA-----GTG-TTACAAACCA-TTCG-AATGCAGTTATAATCCGACA--C-CATCTGA-TCATCAATAGCTAC



AATGGCTCCTCCGACCTCCAGTTGGAGCGTATGAACGTCTACTTCAACGAGGTGCGTGG-----AAC-----AA  
CCATCAGAAAAT--CAATCGAATGCTTGG-----ACTCATCT--CTCGA----ATATAGGCCTCCGGCAATAAGTACGT  
TCCCCGTGCCGTCTTGTGCGACTTGGAGCCCGGNCCTCCCACCCGTGTCCTCTC---ACCTGTTGCTTTGGCGG  
GCCACC--GGGGCCACCCGGTCGCCGGGGGAC-G-TCCGTCCCCGGGCCCGCGCCCGCCGAAG-CGCTCTGTG  
AACCCTGATGAAGATGG-GCTGTCTGAGCG--AATG-AAAATTGTCAAACTTTCAACAATGGATCTCTTGGTTCCGG  
CATCGATGAAGAACGCAGCGAAATGCGATAAGTAATGTGAATTGCAGAATCCCGTGAATCATCGAATCTTTGAACG  
CACATTGCGCCCCCTGGCATTCCGGGGGGCATGCCTGTCCGAGCGTCATTTCTGCCCTCAAGCCCGCTTGTGT  
GTTGGCGTGGTCCCCC--GGGACCTGTCCGAAAGGCAGCGGCGACGTCCGTC--GGTCCTCGAGCGTATGG  
GGCTT-GTCACTCG-CTCGGGACGGATCGGCGGAGGTTGGTCA

>Talaromyces\_cnidii\_KACC\_46617

TG-ACTTTCTAC-TTATC-----GCA---ATGTTG---TGGT--GGTGGTT-AGCTGACTAG-CCG---GTT-----TGATG-AA  
TAGGACAAGGATGGAGATGGTGAGT-----CGCCACGAACACAAA--CAACAACC-AAACGACTTTGA-A  
CAAAGG-----CTATC---A-----ACGGACA-GTTATTGA-----CTCTATC-GAATAGGTCAAATCACAACCAAGGA  
GGGACCCGTATGCGTTCCCTCGGCCAGAACCCCTCCGAATCCGAATTGCAGGACATGATCAACGAGGTGCGACG  
CTGACAACAACGGCACAATCGATTTCCCTGGTATGACAAA-----GCGCACTACCAC-TCGCAATATCACA-----  
---TGGCAG---T-ACTAACTGC--C-G---CAGAATTCCTGACAATGATGGCCCGCAAATGAAGGATACCGACTCCGA  
GGAAGAGATCCGCGAGGCCTTCAAGGTGTTTGACCGTGACAACAATGNGTGAGTTTG-A--CTCG-AC--CCA-----A  
ACTTTC-TATCAATTGTCGCGAC-AACACGCTGACT-----T-TTTCAGGCAAATCATCTCTGCTGAGCACGGTCTTGA  
TGGCTCTGGTGTGTAA-----GTA-TT--CACGAATTCG-AATCCAGCTACAATCCGACA--A-TATCTGA-TCGTCAAC  
AGCTACAATGGCTCCTCCGACCTCCAGTTGGAGCGTATGAACGTCTACTTCAACGAGGTGCGTGC-----AA  
C-----CAAT-CCACCATAT--AACGA-A---ACAAA-----CTCAC-A--ATGG-----TATTAGGCCTCCGGCAACAAATACG  
TCCCCGTGCTGTCTCGTGCAGTTGGAGCCCGGNCCTCCCACCCTTGTCT-CTATAC-ACCCGTTGCTTTGGCG  
GGCCACC--GGGGCCACCTGGTCGCCGGGGGAC-G-TCCGTCCCCGGGCCCGCGCCCGCCGAAG-CGCTCTGT  
GAACCCTGATGAAGATGG-GCTGTCTGAGTA-CTATG-AAAATTGTCAAACTTTCAACAATGGATCTCTTGGTTCCG  
GCATCGATGAAGAACGCAGCGAAATGCGATAAGTAATGTGAATTGCAGAATCCCGTGAATCATCGAATCTTTGAAC  
GCACATTGCGCCCCCTGGCATTCCGGGGGGCATGCCTGTCCGAGCGTCATTTCTGCCCTCAAGCACGGCTTGT  
GTGTTGGGCGCGGTCCCCC--GGGACCTGCCGAAAGGCAGCGGCGACGTCCGTCT--GGTCCTCGAGCGTAT  
GGGGCTCTGTCACTCG-CTCGGAAGGACCTGCGGGGTTGGTCA

>Talaromyces\_derxii\_CBS\_412.89

TG-----CAGG-CTGTC-----GCA---TTTTTT-----TGTGGTTGAGGTCACTAA-CCGGTCTTT-----TAATG-AACA  
GGACAAGGATGGAGATGGTGAGT-----GACCGA----TACGGCA-TGCCGACGAATATTGTCTCGA-ATAA  
AAG-----CTTGAATGT-----ACGGGCA-GATACTGA-----TAGACTC-GAACAGGTCAGATCACTACCAAGGA  
GGGACCCGTATGCGTTCCCTCGGCCAGAACCCCTCCGAATCCGAGTTGCAGGACATGATCAACGAAGTCGAC  
GCTGACAACAACGGCACAATTGATTTCCCTGGTACGATTCA-----TCACTCTAGATGGTGACA---TCGA-----  
---CGATAA----AAACTGACAGC--C-A---CAGAATTCCTGACCATGATGGCCCGCAAATGAAGGATACCGACTCCGAG  
GAAGAGATCCGCGAGGCTTTCAAGGTGTTTGACCGCGACAACAACGNGTGAGTTCTGA--CTCG-ACTGTAA-----A  
AGTCTC-AGTCAATTGTCGCGACAAACATGCTGACT-----T-TACCAGGCAAATCATCTCTGCCGAGCACGGTCTCG  
ACGGCTCTGGTGTGTAA-----GTG-TTGCAAACGA-CTCG-GATCCAAATACAAGCCGATAGTA-TATCTGA-TTATC  
AACAGCTACAATGGCTCCTCCGACCTCCAGTTGGAGCGTATGAACGTCTACTTCAATGAGGTGCGTGA-----  
-AAT----TAACCACCGAAAAAACCCATCGAATGCTTGA-----CTGATGT--TTCGA----ATATAGGCCTCCGGCAA  
CAAATACGTGCCCGTGTCTGCTCGACTTGGAGCCCGGNCCTCCCACCCTTGTCT-CTCTAC-ACCTGTTGC  
TTTGGCGGGCCACC--GGGGCCACCCGGTCGCCGGGGGAC-G--TCGTCCCCGGGCCCGCGCCCGCCGAGG-C  
GCCCTGTGAACCCTGATGAAGATGG-GCTGTCTGAG-A-TCATG-AAAATTGTCAAACTTTCAACAATGGATCTCTT  
GGTTCCGGCATCGATGAAGAACGCAGCGAAATGCGATAAGTAATGTGAATTGCAGAATCCCGTGAATCATCGAATC

TTTGAACGCACATTGCGCCCCCTGGCATTCCGGGGGGCATGCCTGTCCGAGCGTCATTTCTGCCCTCAAGCACG  
GCTTGTGTGTTGGGTGTGGTCCCCC-GGGGACCTGCCCCGAAAGGCAGCGGGCGACGTCCGTCC-GGTCCTCGA  
GCGTATGGGGCTT-GTCACTCG-CTCGGGAAGGACCTGCGGGGGTTGGTCA

>Talaromyces\_duclauxii\_CBS\_322.48

TG-GATTCCGGG-TTGTG-----GCA----ATGTTG---TGGT-GGGTGGTT-AGCTGACTAG-CCG---TTT-----TGATG-  
AATAGGACAAAGACGGAGATGGTGAGT-----GACGC----CACGAA--CACCAACG-ATATACTCTTGAA  
CAAAGG-----CTATT-GCT-----GCGAACA-AATATTGA-----TTATGCC--AACAGGTCAAATCACAACCAAGGA  
GGGCACCGTCATGCGTTCCCTCGGCCAGAACCCTCCGAATCCGAATTGCAGGACATGATCAACGAGGTCGATG  
CTGACAACAACGGCACAATCGATTTCCCTGGTATGATACA-----GCTTCTACTTACCGCAACTGTTTCCGATCGAA-  
-----GCGCAG---ATACTGACCGT--C-G---TAGAATTCTTGACAATGATGGCTCGAAAATGAAGGATACCGACTC  
TGAGGAAGAGATCCGCGAGGCTTTCAAGGTGTTGACCGCGACAACAATGNGTGAGTTG-ACCTTCA-CT--CCG-  
----AATTTTCAAGTCAATTGTCGCGAT-AACACGCTGACTCTGACTCT-TTCCAGGCAAATTATCTCTGCTGAGCACG  
GTCTCGACGGCTCCGGTGTGTAA-----GTA-TT--ACTCAA-TTCA-AATCCAGCTACAATCCGACA--AGTATCTGA-T  
AATCAACAGCTACAATGGCTCCTCCGACCTCCAGTTGGAGCGTATGAACGTTTACTTCAACGAGGTTTCGTCA-----  
-----GAC-----CCAT-CCACACCAT--AAACCGCA--AACAG-----CTCAT-G--ATCG-----ATACAGGCTTCCGGCA  
ACAAATATGTCCCCCGTGTCTCGTCTGACTTGGAGCCCGGNCCTCCCACCCGTGTC--CTCTAC-ACCTGTTG  
CTTTGGCGGGCCACC-GGGGCCACCCGGTCGCCGGGGGAC-G--TTGTCCCCGGGCCCGCGCCCGCCGAAG-  
CGCCCTGTGAACCTGATGAAGATGG-GCTGTCTGAG-A-TGATG-AAAATTGTCAAAACTTTCAACAATGGATCTCT  
TGTTCCGGCATCGATGAAGAACGCAGCGAAATGCGATAAGTAATGTGAATTGCAGAATTCCGTGAATCATCGAAT  
CTTTGAACGCACATTGCGCCCCCTGGCATTCCGGGGGGCATGCCTGTCCGAGCGTCATTTCTGCCCTCAAGCAC  
GGCTTGTGTGTTGGGTGTGGTCCCC--GGGGACCTGCCCCGAAAGGCAGCGGGCGACGTCCGTCC--GGTCCTCGA  
GCGTATGGGGCTC-GTCACTCG-CTCGGGAAGGACCTGCGGGGGTTGGTCA

>Talaromyces\_euchlorocarpus\_PF\_1203

TGAGATACCCGG-TTGTGCG-----GCA----ATGTTATGTTGGT-GGGTGGTT-ATCTAACTAG-CCG---TTT-----TGAT  
G-AATAGGACAAGGATGGAGATGGTGAGT-----GATCCGC----CACGAA--CACCAGCG-ACATGGTCTTT  
AGAACGAGG-----CTATACAGAATAGATACACGGACAGCATGTTGA-----TTATATC-GAATAGGTCAAATCACAAC  
CAAGGAACTGGGCACCGTCATGCGTTCCCTCGGCCAGAACCCTCCGAATCCGAATTGCAGGACATGATCAACG  
AGGTGACGCTGACAACAACGGCACAATCGATTTCCCTGGTATGATACC-----AGCACGTCTGCGC-TGAATAG  
ATACGG-----TGCGG---G-ACTAACTGC--CTA---TAGAATTCTTGACAATGATGGCCCGCAAATGAAGGATAC  
CGACTCCGAGGAAGAGATCCGCGAGGCTTCAAGGTGTTGACCGCGACAACAATGNGTGAGTTGG-ACTTTG-  
ACAAAA-----AACTTTC-AGTCAATTGTCGCGAC-ACCACGCTGACT-----CT-TTGCAGGCAAATCATCTCCGCTGA  
GCACGGTCTCGACGGCTCTGGTGTGTAA-----GTG-TT-GGC AAAA-TTCGAAATCCAGCTACAATCCGACA--A-TA  
TCTGA-TAATCACCAGCTACAATGGCTCCTCCGACCTCCAGTTGGAGCGTATGAACGTCTACTTCAACGAGGTGC  
GTTA-----AGAA-----CATCATCAAAT--AAACCG-AAAGACAAA-----ACACTCATCG--TTCG-----ATAGG  
CTTCCGGCAACAAATATGTCCCTCGTGTCTGCTCGTCTGACTTGGAGCCCGGNCCTCCCACCCCTTGTCT-CTATA  
C-ACCTGTTGCTTTGGCGGGCCACC-GGGGCCACCCGGTCGCCGGGGGAC-G-TCCGTCCCCGGGCCCGCGC  
CCGCCGAAG-CGCCCTGTGAACCCTGATGAAGATGG-GCTGTCTGAGTA-CTATG-AAAATTGTCAAAACTTTAAC  
AATGGATCTCTTGGTCCGGCATCGATGAAGAACGCAGCGAAATGCGATAAGTAATGTGAATTGCAGAATTCCGTG  
AATCATCGAATCTTTGAACGCACATTGCGCCCCATGGCATTCCGGGGGGCATGCCTGTCCAGCGTCATTTCTGC  
CCTCAAGCGCGGCTTGTGTGTTGGGTGCGGTCCCCC-GGGGACCTGCCCCGAAAGGCAGCGGGCGACGTCCGT  
CC-GGTCCTCGAGCGCATGGGGCTTTGCTACTCGACTCGGGAAGGACCTGCGGGGGTTGGTCA

>Talaromyces\_flavovirens\_CBS\_102801

TG-GCTATCTAC-TTATC-----GCA----ATGTTG---TGG--GAGTGATT-AGCTGACTAG-CCC---CTT-----TGATG-AG  
TAGGACAAGGACGGAGATGGTGAGT-----CGCCACGAACACGGA--CAACAACC-AAAAGATTCTCA-A

TAAAGG-----CTATC---G-----ACGAATA-AATGTTGA-----CTTTATT-GAATAGGTCAAATCACAAACCAAGGAACTG  
GGCACCGTCATGCGTTCTCTCGGCCAGAACCCTCCGAATCCGAATTGCAGGACATGATCAACGAAGTCGACGC  
TGACAACAACGGCACAATCGATTTTCTGGTATGACAAA-----GCACACTATCACGTCAATATTCCA-----  
TGGCAG----T-ACTAACTGC--C-G---CAGAATTCCTGACAATGATGGCCCGCAAATGAAGGATACCGACTCCGAGG  
AAGAGATCCGCGAGGCTTTCAAGGTGTTTGACCGCGACAACAATGNGTGAGTTTG-A--CTCG-AC--CCA-----AAC  
TTTC-TCTCAATTGTCGCGAC-AAAACCCTGACT-----T-TTTCAGGCAAATCATCTCTGCTGAGCACGGTCTCGATG  
GCTCGGGTGTGTAA-----GTA-TT---CACCA-TTCG-AATCCAGCTACAATCCGACA--A-TGTCTGA-TCGTCAACAG  
CTACAATGGCTCCTCCGACCTCCAGTTGGAGCGTATGAACGTCTACTTCAACGAGGTGCGTGC-----AAC--  
---AAAT-CCACCATAT--AACGA-A--ACAAATAAAGAAACAGACTCAC-A--ATGG----TA-TAGGCCTCCGGCAACAAAT  
ACGTCCCTCGTGTCTCTCGTCTGACTTTGGAGCCCGGNCCTCCCACCCTTGTC--CTCTAC-ACCTGTTGCTTTGG  
CGGGCCACC-GGGGCGACCTGGTCGCCGGGGGAC-G-AACGTCCCCGGGCCCGCGCCCGCCGAAG-CGCTCT  
GTGAACCCTGATGAAGATGG-GCTGTCTGAG-A-CGATG-AAAATTGTCAAACTTTCAACAATGGATCTCTTGGTTC  
CGGCATCGATGAAGAACGCAGCGAAATGCGATAAGTAATGTGAATTGCAGAATCCGTGAATCATCGAATCTTTGA  
ACGCACATTGCGCCCCCTGGCATTCCGGGGGGCATGCCTGTCCGAGCGTCATTTCTGCCCTCAAGCACGGCTT  
GTGTGTTGGGTGTGGTCCCCC-GGGGACCTGCCGAAAGGCAGCGGGCGACGTCCGTC--GGTCTCGAGCGTA  
TGGGGCTT-GTCACTCG-CTCGGAAGGACCTGCGGGGGTTGGTCA

>Talaromyces\_flavus\_CBS\_310.38

TG-GATTTCCGG-TTGTG-----GCA----ATGTGG---TGGT-GGGTGGTT-AGCTGACTAG-CCG---TTT-----GGATG-  
AGTAGGACAAGGATGGAGATGGTGAGT-----GAAC----CACGAA--CACCAACG-ATACAGCAACGA-AT  
AAGTA-CTGTCGTTATG-ATT-----GCGAGCAAATTATTGA-----CGGGGACTGAACAGGTCAAATCACAAACGAAG  
GAACTGGGCACCGTCATGCGTTCCCTCGGCCAGAACCCTCCGAATCCGAATTGCAGGACATGATCAACGAAGT  
CGACGCTGACAACAACGGCACAATCGATTTCCCTGGTATGGCAA-----ACCTGTCTACGGT-TATTA-----CAA--  
-----TGGCAG----A-ACTAACTGC--CAA---CAGAATTCCTGACAATGATGGCCCGCAAATGAAGGATACCGATTCC  
GAGGAAGAGATCCGCGAGGCTTTCAAGGTGTTTGACCGTGATAACAATGNGTGAGTTTG-ACTCTCG-AC--CGA---  
---AACTCTC-----AATTGTCGCGAC-AACACGCTGACT-----T-TTCCAGGCAAATCATCTCCGCTGAGCACGGTCTCG  
ACGGCTCCGGTGTGTAA-----GTA-TT--ACACGA-TTCA-AATCCAGCTACGATCCAACA--A-TATCTGA-TAATCAAC  
AGCTACAATGGCTCCTCCGACCTCCAGTTGGAGCGTATGAACGTTTACTTCAACGAGGTGCGTCA-----AA  
C-----CACT-CCACCTAAT--AAACGGAA--GACAAA-----CTCAT-G--ATCG-----ATATAGGCTTCCGGCAACAAATAT  
GTCCCTCGTGTCTCTCGTCTGACTTTGGAGCCCGGNCCTCCCACCCTTGTC--CTATAC-ACCTGTTGCTTTGGCG  
GGCCACC-GGGGCCACCTGGTCGCCGGGGGAC-G---CGTCTCCGGGCCCGCGCCCGCCGAAG-CGCTCTGTG  
AACCTGATGAAGATGG-GCTGTCTGAG-A-CTATG-AAAATTGTCAAACTTTCAACAATGGATCTCTTGGTTCGG  
CATCGATGAAGAACGCAGCGAAATGCGATAAGTAATGTGAATTGCAGAATCCGTGAATCATCGAATCTTTGAACG  
CACATTGCGCCCCCTGGCATTCCGGGGGGCATGCCTGTCCGAGCGTCATTTCTGCCCTCAAGCACGGCTTGTG  
GTTGGGTGCGGTCCCCC-GGGGACCTGCCGAAAGGCAGCGGGCGACGCCGTC--GGTCTCGAGCGTATGG  
GGCTC-GTCACTCG-CTCGGAAGGACCTGCGGGGGTTGGTCA

>Talaromyces\_funiculosus\_CBS\_272.86

TG-GATTTCCGG-TTGTG-----GCA----ATGTTA-----TGGTGGTT-AGCTGACTAG-CCG---TTG-----AAATA-ATT  
AGGACAAGGATGGAGATGGTGAGT-----CCGC-----CACGAA--TGATAACC-AGATGATCTTGA-GCAAA  
GT-----TTATC-GCA-----TCGAATA-TATATTAA-----CTATATT-CAAAAGGCCAAATCACAAACCAAGGAACTGGGC  
ACTGTCATGCGTTCCCTCGGCCAGAACCCTCCGAATCCGAATTGCAGGACATGATCAATGAAGTCGATGCTGAC  
AACACGGAACAATCGATTTCCCTGGTATGACAAA-----CTGCAAAC-TCTCAGTTTCTA-----CCACA  
G----T-ACTAACTAA--C-A---CAGAATTCCTGACTATGATGGCCCGCAAATGAAGGATACTGACTCCGAGGAAGAGA  
TCCGTGAGGCTTTCAAGGTGTTTGACCGTGACAACAATGNGTGAGTTTA-ACTCAAAC-AC-----TATCAATT  
GGCGCAAC-AACACACTGACT-----C-GTCCAGGCAAATCATCTCTGCTGAGCACGGTCTCGACGGTCCGGTGT

GTAA-----GTA-TT---CACGA-TCCG-AAACCAACTACAATCAGACA--G-TATCTGA-TAATCAACAGCTACAATGGCT  
CCTCCGATCTCCAGTTGGAGCGTATGAACGTCTACTTCAACGAGGTGCGTAA-----AAC----AAAT-TCATCG  
TAC--AAACGGAA---ATAAA-----TCTCAT-A--ACGG----TC-CAGGCCTCCGGCAACAAATATGTCCCTCGTGCTG  
TCCTGGTCGATTTGGAGCCCGGNCCTCCCACCCCTTGTC--CTCTAC-ACCTGTTGCTTTGGCGGGCCAC--GGGG  
CC-CCTGGTCGCCGGGGGAC-G--CCGTCCCCGGGCCCGCGCCCGCCGAAG-CGCTTCGTGAACCCTGATGAAG  
AAGG-GCTGTCTGAG-A-CTATG-AAAATTGTCAAACTTTCAACAATGGATCTCTTGTTCCGGCATCGATGAAGAA  
CGCAGCGAAATGCGATAAGTAATGTGAATTGCAGAATCCGTGAATCATCGAATCTTTGAACGCACATTGCGCCCC  
CTGGCATTCCGGGGGGCATGCCTGTCCGAGCGTCAATTTCTGCCCTCAAGCACGGCTTGTGTGTTGGGTGTGGT  
CCCC--GGGGACCTGCCGAAAGGCAGCGGCGACGTCCGTC--GGTCCTCGAGCGTATGGGGCTC-GTCACTCG  
-CTCGGAAGGACCTGCGGGGGTTGGTCA

>Talaromyces\_galapagensis\_CBS\_751.74

TG-GATTTCTGG-TTGTG-----GCA---TTGTTT---TGGT-GGCTGGTT-AGCTGACTAG--CG---TTT-----TGATG-A  
GTAGGACAAGGATGGTGTGTTGAGT-----CCGC----CACGAA--CA-CGATG-ATATCGTCTCGA-ACAA  
AGG-----TTGTT-TC-----ACGAACA-GATATTGA-----TAAACTC-CAATAGGCCAAATCACAACCAAGGAATTGG  
GCACTGTCATGCGTTCCCTCGGTGAGAACCCTCCGAATCTGAATTGCAGGACATGATCAACGAAGTCGACGCT  
GACAACAACGGCACAATTGATTTCCCTGGTATGACAAACCACAA-----GCTCGCGATT-T-----TTA-----TGG  
CGATACTT-ACTAACTGC--C-G---CAGAATTCTTGACGATGATGGCCCGTAAAATGAAGGATACCGACTCCGAGGAA  
GAGATCCGTGAGGCATTCAAGGTGTTTGACCGTGACAACAATGNGTAAGTTTG-ACTGTCA-AC--CCG-----AACTT  
TG-CCTCAGTTGTCGCGAC-AACACACTGACT-----T-CTCCAGGCAAATCATCTCTGCTGAGCACGGCCTCGATGG  
CTCTGGTGTGTAA-----GTA-TT--GCACGA-TTCG-AATCTAGCTCCAATCCGACA--A-TATCTGA-TTGTCAATAGCT  
ACAATGGCTCCTCCGACCTCCAGTTGGAGCGTATGAACGTCTACTTCAACGAGGTGCGTTA-----TAAA-----  
ACAC-TCGACTTAT---GCAG-A---ACAAA-----CACTC-A--TTGG-----TA-TAGGCCTCCGGCAACAAATACGTTCC  
CCGTGCTGTCCCTCGTCGACTTGGAGCCCGGNCCTCCCACCCCTTGTC--CTATAC-ACCTGTTGCTTTGGCGGGCC  
CACC-GGGGCCACCTGGTCGCCGGGGGAT-A-CACGTCCCCGGGCCCGCGCCCGCCGAAG-CGCCCTGTGAAC  
CCTGATGAAGATGG-GCTGTCTGAG-A-CTGTG-AAAATGGTCAAACTTTCAACAATGGATCTCTTGTTCCGGCA  
TCGATGAAGAACGCAGCGAAATGCGATAAGTAATGTGAATTGCAGAATCCGTGAATCATCGAATCTTTGAACGCA  
CATTGCGCCCCCTGGCATTCCGGGGGGCATGCCTGTCCGAGCGTCATTTCTGCCCTCAAGCACGGCTTGTGTGT  
TGGGTGTGGTCCCCC--GGGGACCTGCCGAAAGGCAGCGGCGACGTCCGTC--GGTCCTCGAGCGTATGGGG  
CTC-GTCACTCG-CTCGGGACGGACCTGCGGGGGTTGGTCA

>Talaromyces\_indigoticus\_CBS\_100534

TG-GATTCCTGG-TTGTG-----GCA---ATGTTG---TGGT-GGGTGGTT-AGCTGACTAG--CG---GTT-----TGATG-A  
GTAGGACAAGGATGGTGTGTTGAGT-----TCGC----CACGAA--CAACGACC-AAAAGACCTTGA-ACA  
AAGG-----TCATT-GCT-----ACGAACA-GATATTGA-----CTATATC-GAATAGGTCAAATTACGACCAAGGAATTGG  
GCACCGTCATGCGTTCCCTCGGCCAGAACCCTCCGAATCCGAATTGCAGGACATGATCAACGAAGTCGACGCT  
GACAACAACGGCACAATTGATTTCCCTGGTATGACGAA-----CCACACCACCAC-TCGCAATATTACA-----  
TAGCAG----T-ACTAACTGC--T-A---CAGAATTCTTGACAATGATGGCTCGCAAAATGAAGGATACCGACTCCGAGGA  
AGAGATCCGCGAGGCTTTCAAGGTGTTTGACCGTGACAACAATGNGTGAGTTTG-ACTCCCG-AC--CCA-----AAC  
TTTC-GATCAATTGTCACGAC-AACACGCTGACT-----T-TTCCAGGCAAATCATCTCTGCTGAGCACGGTCTCGAC  
GGCTCTGGTGTGTAA-----GTA-TT--ACACGT-TTCG-AATCCACCTACCATCCGGCA--G-TGTCTGA-TTATCAACA  
GCTACAATGGCTCCTCCGACCTCCAGTTGGAGCGTATGAACGTCTACTTCAACGAGGTGCGTTA-----GAA-  
---GACTCTCGACTCAT---GCAG-A---ACAAA-----CACTC--ATTG-----GTATAGGCCTCCGGAAACAAATATGTC  
CCCCGTGCTGTCCCTCGTCGACTTGGAGCCCGGNCCTCCCACCCCTTGTC--CTATATAACCTGTTGCTTTGGCGGG  
CCCACCCTGTG--GCCAGGTGCGCGGGGGAC-G--TCGTCCCCGGGCCCGCGCCCGCCGAAG-CGCCCTGTGAA  
CCCTGATGAAGATGG--CTGTCTGAGTC-GTATG-AGAATCGT-AAAACCTTTCAACAATGGATCTCTTGTTCCGGCA

TCGATGAAGAACGCAGCGAAATGCGATAAGTAATGTGAATTGCAGAATCCCGTGAATCATCGAATCTTTGAACGCA  
CATTGCGCCCCCTGGCATTCCGGGGGGCATGCCTGTCCGAGCGTCATTCTGCCCTCAAGCACGGCTTGTGTGT  
TGGGTGTGGTCCCCC-GGGGACCTGCCGAAAAGGCAGCGGCGACGTCCGTC--GGTCCTCGAGCGTATGGGG  
CTT-GTCACTCG-CTCGGAAGGACCTGCGGGGGTTGGTCA

>Talaromyces\_intermedius\_CBS\_152.65

TG-GATTCTAG-TTGTG-----GCA----ATGTTATGCTGGT-GGGTGGCT-AGCTGATTAG-CCG---TTT-----TGATG  
-AGTAGGACAAGGATGGAGATGGTGAGT-----GATCCGC----CTCGAC--CACCGACG-AGATAGTCTTCG  
AACAAAGGCTTT---TGTTCCGAT-----GTGGACAGCATATTGA-----CTATATCGGAATAGGTCAAATTACAACCAA  
GGAGCTCGGCACCGTCATGCGTTCCCTCGGCCAGAACCCTCCGAATCCGAATTGCAGGACATGATCAACGAAG  
TCGACGCTGACAACAACGGCACAATTGATTTCCCTGGTATGACACA-----CTACAAC-TCGCAATCGTCTA-  
-----TGGCAG---TTGCTAACTGCTAC-A---CAGAATTCTTAACAATGATGGCCCGCAAATGAAGGATACCGACT  
CCGAGGAAGAGATCCGGGAGGCTTTCAAGGTGTTTGACCGTGACAACAATGNGTGAGTTTGA-ACCTTTGA-AA-AC  
A-----AACTCTG-GGTCAATTATCGCGAC-AACACGCTGACT-----C-TTCCAGGCAAATCATCTCTGCTGAGCACGG  
TCTCGACGGCTCTGGTGTGTAA-----GTATTT--ACACGA-TTCGAAATCCGATTACAATCCGACA--A-TATCTGA-TA  
ATCAACAGTTACAATGGTTCTCCGATCTCCAGTTGGAGCGTATGAACGTTTACTTCAACGAGGTTTCGTCA-----  
-----GAA-----CAAT-CCGCCAAAC--AAATCAAA--CACAAG-----ACTCATCA--CTGG-----TATAGGCTTCGGCAA  
CAAATATGTCCCCCGTGTCTGCTCGTACTTGGAGCCCGNCCCTCCACCCTTGTC--CTATAC-ACCTGTTGC  
TTTGGCGGGCCACC-GGGGCCACCTGGTCGCCGGGGGAC-G---CGTCCCCGGGCCCGCGCCCGCCGAAG-CG  
CCCTGTGAACCCTGATGAATATGG-GCTGTCTGAG-A-CTATG-AAAATTGTCAAACTTTCAACAATGGATCTCTTG  
GTTCCGGCATCGATGAAGAACGCAGCGAAATGCGATAAGTAATGTGAATTGCAGAATCCCGTGAATCATCGAATCT  
TTGAACGCACATTGCGCCCCCTGGCATTCCGGGGGGCATGCCTGTCCGAGCGTCATTTCTGCCCTCAAGCACG  
GCTTGTGTGTTGGGTGTGGTCCCCC-GGGGACCTGCCGAAAAGGCAGCGGCGACGTCCGTC--GGTCCTCGAG  
CGTATGGGGCTT-GTCACTCG-CTCGGAAGGACCTGCGGGGGTTGGTCA

>Talaromyces\_liani\_CBS\_225.66

TA-GCAATCTGG-TTGTG-----GCA----ATGTTG---TGGT-GGGTGGTT-AGCTGACTAG-CCG---TTT-----TGATG-  
AGTAGGACAAGGATGGAGATGGTGAGT-----CGGC----CACGAA--CAATATCC-AAAAGGCGTTGA-AC  
AAGGG-----TTATC-GCC-----GCGAACA-GATATTGA-----CTATATC-GAATAGGTCAAATCACAACCAAGGAACT  
GGGCACTGTCATGCGTTCCCTCGGCCAGAACCCTCCGAATCCGAATGCAGGACATGATCAACGAAGTTCGACG  
CTGACAACAACGGCACAATCGATTTCCCTGGTATGATATA-----ATTGCTCACAGGA-TATTA----CGA-----T  
GGCAG---T-ACTAACTGC--C-G---CAGAATTCCTGACAATGATGGCCCGCAAATGAAGGACACCGACTCCGAGGA  
AGAGATCCGCGAGGCATTCAAGGTGTTTGACCGTGACAACAATGNGTGAGTTGG-ACTCTCG-AC--CCG-----AAC  
TTTC-TCTCAATTGTCGCGAC-AACACGCTGACT-----T-TTCCAGGCAAATCATCTCTGCTGAGCACGGTCTCGATG  
GCTCTGGTGTGTAA-----GTA-TT--GCACGA-TTCG-ACTCCAGCTACGATCCGACG--A-TATCTGA-TAATCAACAG  
CTACAATGGCTCCTCCGACCTCCAGTTGGAGCGTATGAACGTTTACTTCAACGAGGTGCGTCA-----AC----  
-CAAT-CCATCGTAT--AAACGG-A---ACAAA-----GCTCAT-A--CTGG-----TGTAGGCCTCCGGCAACAAATACGTT  
CCCCGTGCTGTCTCGTACTTGGAGCCCGNCCCTCCACCCTTGCTCCTATAC-ACCTGTTGCTTTGGCGG  
GCCACC-GGGGCCACCTGGTCGCCGGGGGAC-G-CACGTCCCCGGGCCCGCGCCCGCCGAAG-CGCGCTGTG  
AACCCTGATGAAGATGG-GCTGTCTGAG-A-CTATG-AAAATTGTCAAACTTTCAACAATGGATCTCTTGGTTCCGG  
CATCGATGAAGAACGCAGCGAAATGCGATAAGTAATGTGAATTGCAGAATCCGTGAATCATCGAATCTTTGAACG  
CACATTGCGCCCCCTGGCATTCCGGGGGGCATGCCTGTCCGAGCGTCATTTCTGCCCTCAAGCACGGCTTGTGT  
GTTGGGTGTGGTCCCCC-GGGGACCTGCCGAAAAGGCAGCGGCGACGTCCGTC--GGTCCTCGAGCGTATGG  
GGCTC-GTCACTCG-CTCGGAAGGACCTGCGGGGGTTGGTCA

>Talaromyces\_macrosporus\_CBS\_317.63

TG-GATTCTAG-TTGTG-----GCA----ATGT-----GGTGATT-CGCTGACTAG-CCG---TT-----TGATG-CGCA

GGACAAGGATGGAGATGGTGAGT-----CCGC-----CACGAA--CAATAGCC-AAAAGGCCTCGA-ACAAA  
GG-----CCGTC-GCT-----GCGAACA-GATATTGA-----CTATATC-GAATAGGCCAAATCACAACCAAGGAACTGG  
GCACCGTCATGCGTTCCCTCGGCCAGAACCCTCCGAATCCGAATGCAGGACATGATCAACGAGGTTCGATGCT  
GACAACAACGGCACAATCGACTTCCCTGGTATGACAAA-----CTACAAAC-TCGCA---TTCTA-----TGG  
CAG---T-ACTAACTGC--C-G--CAGAATTCTTGACAATGATGGCCCGCAAGATGAAGGATACCGACTCCGAGGAAG  
AGATCCGCGAGGCTTTCAAGGTGTTTGACCGTGACAACAATGNGTGAGTTTG-ACTCTCG-GC--CCA-----ACCTTT  
C-TATCAATGGTCGCGAC-AACACGCTGACT-----TT-TTCCAGGCAAATCATCTCCGCTGAGCACGGTCTCGACGG  
CTCTGGTGTGTAA-----GTA-TT--CACGA-TTCG-AATCCAGCGACAATCCGACA--A-TATCTGA-TGATCAACAGCT  
ACAATGGCTCCTCCGACCTCCAATTGGAGCGTATGAACGTCTACTTCAACGAGGTGCGTCA-----AAC-----C  
AAT-TCATCGTAT--AAACGG-A--ATAAA-----ACTCAT-A--ATGG-----AATAGGCCTCCGGCAACAAATATGTCCCC  
CGTGCTGTCTCGTATTGGAGCCCGGNCCTCCACCCTTGTC--CTATAC-ACCTGTTGCTTTGGCGGGGCCA  
CTGGGGGGCCCCCTGGTCGCCGGGGGAC-A-TCCGTCCCCGGGCCCGCGCCCGCCGAAG-CGCTCTGTGAACCC  
TGATGAAGATGG-GCTGTCTGAG-A-TTATG-AAAATTGTCAAAACTTTCAACAATGGATCTCTTGGTTCGGGCATCG  
ATGAAGAACGCAGCGAAATGCGATAAGTAATGTAATTGCAGAATTCCGTGAATCATCGAATCTTTGAACGCACAT  
TGCGCCCCCTGGCATTCCGGGGGCATGCCTGTCCGAGCGTCAATTTCTGCCCTCAAGCACGGCTTGTGTTGTTGG  
GTGTGGTCCCCCC-GGGGACCTGCCGAAAGGCAGCGCGACGTCCGTC--GGTCTCGAGCGTATGGGGCTC-  
GTCACTCG-CTCGGAAGGACCTGCGGGGGTTGGTCA

>Talaromyces\_marneffeii\_CBS\_388.87

TG-GATTTCTGG-TTGTG-----GCA----ATGTTG---TGGT-GGGTGGTT-CGCTGACTAG-CCG---TTT-----GGATG-  
AATAGGACAAGGATGGTGATGGTGAGT-----GACGC-----CACGAA--CACCAGAC-ATATAGTCTTCGAA  
CAAAAAG-----TTATT-ACT-----GCGAACA-GATATTAA-----TAACATC--AATAGGTCAAATTACAACCAAGGAACT  
GGGCACCGTCATGCGTTCCCTCGGCCAGAACCCTCCGAATCCGAATTGCAGGACATGATCAACGAGGTTCGACG  
CTGACAACAACGGCACAATCGATTTCCCTGGTATGATGCA-----GCCTCTATTTATCGCAGCCGTTTCCGATCATAA-  
-----GGGCAG---ATACTGACTGC--C-T--TAGAATTCTTGACAATGATGGCCCGCAAAATGAAGGATACCGACTC  
CGAGGAAGAGATCCGCGAGGCTTTCAAGGTGTTTGATCGTGACAACAATGNGTGAGTTTG-GCTCTCA-ACAAAC  
ACATCACAACCTTTC-AGTCACTTGTGCGAC-AACACGCTGACTC-----TT-TTCCAGGCAAATCATCTCCGCCGAGC  
ACGGCCTCGACGGCTCCGGTGTGTAA-----GTA-TT--ACACGA-TTCA-AATCCAGCTACAATCCGACA--ATTATCT  
GA-TGATCAACAGCTACAATGGCTCCTCCGACCTCCAGTTGGAGCGTATGAACGTTTACTTCAACGAGGTGCGTC  
A-----GAC-----CCTT-CCACCTAAT--AAACCGAA--GACGAA-----CTCATCATCATCG-----ATATAGGCTTC  
CGGCAACAAATATGTCCCCGTGCTGTCTCGTACTTGGAGCCCGGNCCTCCACCCTTGTC--CTATAC-ACC  
TGTTGCTTTGGCGGGCCACC-GGGGCCACCCGGTCCGCCGGGGGAC-G--TTGTCCCCGGGCCCGCGCCCGCC  
GAAG-CGCCCTGTGAACCCCTGATGAAGATGG-ACTGTCTGAG-A-CCATG-AAAATTGTCAAAACTTTCAACAATGGA  
TCTCTTGGTTCGGGCATCGATGAAGAACGCAGCGAAATGCGATAAGTAATGTGAATTGCAGAATCCCGTGAATCAT  
CGAATCTTTGAACGCACATTGCGCCCCCTGGCATTCCGGGGGGCATGCCTGTCCGAGCGTCATTTCTGCCCTCA  
AGCACGGCTTGTGTGTTGGGTGTGGTCCCTCC-GGGGACCTGCCGAAAGGCAGCGCGACGTCCGTC--GGTC  
CTCGAGCGTATGGGGCTC-GTCACTCG-CTCGGAAGGACCTGCGGGGGTTGGTCA

>Talaromyces\_muroii\_CBS\_756.96

TG-GATTTCTAC-TTGTG-----GCA----ATGTTG---TGGT-GGGTGGTT-AGCTGACTAG-CCG---TTT-----TGATG-A  
GTAGGACAAGGATGGAGATGGTGAGT-----CCGC-----CACGAA--AAATAACC-AAAAGGCCTTGA-ACA  
AAGG-----TTATC-GCT-----GCGAACA-GATATTGA-----CTATGTC-GAATAGGTCAAATCACAACCAAGGAACTG  
GGCACCGTCATGCGTTCTCTCGGCCAGAACCCTCCGAATCCGAATTGCAGGACATGATCAACGAAGTTCGACGC  
TGACAACAACGGCACAATCGATTTCCCTGGTATGACAAA-----CCACAAGC-TCGCAATAATCTA-----T  
GGCAG---T-ACTAACTGC--C-G--CAGAATTCTTGACAATGATGGCCCGCAAAATGAAGGATACCGACTCCGAAGA  
AGAGATCCGCGAGGCTTTCAAGGTGTTTGACCGCGACAACAATGNGTGAGTTTG-ACTCTCG-AC--CCG-----AAC

TTTC-TATCAATTGTCGCGAC-AACACGCTGACT-----T-TTCTAGGCAAATCATCTCTGCTGAGCACGGTCTCGATG  
GCTCTGGTGTGTAA-----GTA-TT--GCACGA-TTCG-ATTCCAGCTACAATCCGACA--A-TATCTGA-TTATCAACAGC  
TACAATGGCTCCTCCGACCTCCAGTTGGAGCGTATGAACGTCTACTTCAACGAGGTGCGTTA-----GAAA----  
-ACAC-TCGACTCAT---GCAG-A---ACAAA-----CACTC-A--TTTG-----AA-TAGGCCTCCGGCAACAAATACGTTT  
CCCGTGTCTCCTCGTCTGACTTGGAGCCCGGNCCTCCCACCCTTGTCTGTTTATA--ACCTGTTGCTTTGGCGGGC  
CCACC-GGGGCCACCTGGTCGCCGGGGGAC---ACGTTCCCGGGCCCGTGCCCGCGAAG-CGCCCCTAGAACT  
CTGGTGAAGCTAG-GCTGTCTGAG-C-TTATG-AAAATAGT-AAAACCTTCAACAATGGATCTCTTGGTTCCGGCATCG  
ATGAAGAACGCGAGCAAATGCGATAAGTAATGTAATTGCAGAATTCCGTGAATCATCGAATCTTTGAACGCACAT  
TGCGCCCCCTGGCATTCCGGGGGGCATGCCTGTCCGAGCGTCATTTCTGCCCTCAAGCGCGGCTTGTGTGTTG  
GGTGTGGTCCCCC-GGGGACCTGCCGAAAGGCAGCGGCGACGTCCGTCG-GGTCCTCGAGCGCATGGGGC  
TT-GTCACTCG-CTCGGGAGGGACCCGCGGGGGTTGGTCA

>Talaromyces\_oumae-annae\_CBS\_138208

TG-GATTTCTGA-TTGAC-----GCA---ATGTTT--GTGAT--CGTGGTT-AGCTGACTAG-CCG---TTT-----TGATG-A  
GTAGGACAAGGATGGAGATGGTGAGT-----GACCGC----CACGAA--CGTCGATG-ATACAGTCAACG-AA  
TAAGGGCTATCCTTATG-ATT-----GCGAACAGCATATTGA-----TGGTATTTGAACAGGTGAGATCACCACCAAGG  
AATTGGGCACCGTCATGCGTTCCCTCGGCCAGAACCCTCCGAATCCGAATTGCAGGACATGATCAACGAGGTC  
GACGCTGACAACAACGGCACAATCGATTTCCCTGGTATGACATA-----ACCTATCAGACGCAGCCATATATGACTAT  
CGAG-----TGGCAG---A-ACTAATTGC--C-A--CAGAATTCTTGACAATGATGGCCCCGAAAATGAAGGATACCG  
ACTCCGAGGAAGAGATCCGTGAGGCTTTCAAGGTGTTTGACCGCGACAACAATGNGTGAGTTTG--GTCCCG-AC-  
-CCA-----AACTTTC-TATCAATCGTCGCAAC-AACATGCTGATT-----C-TTTCAGGCAAATCATCTCTGCTGAGCACG  
GTCTCGACGGCTCTGGTGTGTAA-----GTG-TT--ACACGA-TTCG-AATCCAGCTACAATCCGACA--A-TATCTGA--  
CATCAACAGCTACAATGGCTCCTCCGACCTCCAGTTGGAGCGTATGAACGTTTACTTCAACGAGGTGCGTCA-----  
-----GACCATCTCACC-ACACCAGAT---AACCCGA---ACAAA-----ACTCAT-A--ATTG-----GTATAGGCCTCCGG  
CAACAAATATGTCCCTCGTCTGTCTCGTCTGACTTGGAGCCCGGNCCTCCCACCCTTGTCT-CTACAC-ACCTGT  
TGCTTTGGCGGGCCACC-GGGGCCACCCGGTCGCCGGGGGACGTTTCGTCCCCGGGCCCGCGCCCCGCG  
AAG-CGCCCTGTGAACCCTGATGAAGATGG-GCTGTCTGAGTA-CTATG-AAAATTGTCAAACTTTCAACAATGGAT  
CTCTTGGTTCCGGCATCGATGAAGAACGCAGCGAAATGCGATAAGTAATGTGAATTGCAGAATCCGTGAATCATC  
GAATCTTTGAACGCACATTGCGCCCCCTGGCATTCCGGGGGGCATGCCTGTCCGAGCGTCATTTCTGCCCTCAA  
GCACGGCTTGTGTGTTGGGTGCGGTCCCCC-GGGGACCTGCCGAAAGGCAGCGGCGACGTCCGTCT-GGTC  
CTCGAGCGTATGGGGCTCTGTCACTCG-CTCGGGACGGACCTGCGGGGGTTGGTCA

>Talaromyces\_panamensis\_CBS\_128.89

TG-GATTTTTAGTTGGTC-----GCA---ATGTTG---TGGT-GGGCTGTT-AGCTGACGCG-CCG---TGT-----TGATG-  
AGTAGGACAAGGATGGCGATGGTGAGT-----GATCCGC----CACGAG--CACCAACA-ATGCAGTTTTGA-  
GCAAGGGATATGATGATGAAAC-----ATGAACAACGGATTGA-----TTGTATCTAAATAGGTCAAATCACAACCAA  
GGAAGTCCGGCACCGTCATGCGTTCCCTCGGCCAGAACCCTCCGAATCCGAATTGCAGGACATGATCAACGAGG  
TCGACGCCGACAACAACGGCACAATCGATTTCCCTGGTATGAGCCA-----ACCCGTCTACGTT-TGTTA----CG  
G-----GGGCAG---A-ACTAACTGC--CTA---CAGAATTCTTGACAATGATGGCTCGCAAAATGAAGGATACCGACT  
CCGAAGAAGAGATCCGTGAGGCTTTCAAGGTGTTTGACCGCGACAACAATGNGTGAGTTTG-ACGTTAA-AC--AC  
AACG---AGCTTTA-CATCAATTGTCGCGAC-AATACGCTGACT-----CT-TTCCAGGCAAATCATCTCTGCTGAGCACG  
GTCTCGACGGCTCTGGTGTGTAA-----GTG-TTGGACACGA-TTCGAACTCCGGCTGCAATCCGACA--A-TTTTTA  
A-CGATCAACAGTTACAATGGCTCCTCCGACCTCCAGTTGGAGCGTATGAACGTTACTTCAACGAGGTGCGTTA--  
-----GGA-----ACAGTCGATCCAAGCGAGA--AACAAA-----CTCATCA--ATTG-----ATATAGGCCCCCCGG  
CAACAAATATGTCCCTCGTGCCGTCCTCGTCTGACTTGGAGCCCGGNCCTCCCACCCTTGTCT-CTACAC-ACCTGT  
TGCTTTGGCGGGCCACC-GGGGCCACCCGGTCGCCGGGGGAC-G---CGTCCCCGGGCCCGCGCCCCGCGAA

G-CGCCCTGTGAACCCTGATGAAGATGG-GCTGTCTGAG-A-CGATG-AAAATTGTCAAACTTTCAACAATGGATCT  
CTTGGTCCGGCATCGATGAAGAACGCAGCGAAATGCGATAAGTAATGTGAATTGCAGAATCCGTGAATCATCGA  
ATCTTTGAACGCACATTGCGCCCCCTGGCATTCCGGGGGGCATGCCTGTCCGAGCGTCATTTCTGCCCTCAAGC  
ACGGCTTGTGTGTTGGGTGCGGTCCCCC-GGGGACCTGCCCGAAAGGCAGCGGCGACGCCCGTC--GGTCT  
CGAGCGCATGGGGCTT-GTCACTCG-CTCGGGATGGACCTGCGGGGGTTGGTCA

>Talaromyces\_pinophilus\_CBS\_631.66

TG-GAAATCTGG-TTGTG-----GCA----ATGTTG---TGGT-GGATGGTT-AGCTGACTAG-CCG---TTT-----TGATG-A  
GTAGGACAAGGATGGAGATGGTGAAT-----CCGC----CACGAA--CACGACGA-TATTTGTCTCGA-ACA  
AAGG-----TTTTT-TC-----ACGAGCA-TATATTGA-----TAAAATC-TAATAGGCCAAATTACAACCTAAGGAACTGGG  
CACCGTTATGCGTTCCCTCGGCCAGAACCCCTCCGAATCCGAATGCAGGACATGATCAACGAAGTGCAGCGTG  
ACAACAACGGCACAATCGATTTCCCTGGTATGATATA-----ATTGTTACGGGT-T---TATA--CGA-----TGGC  
AG---T-ACTAACTGC--C-G--CAGAATCTTGACAATGATGGCCCGCAAATGAAGGATACCGACTCCGAGGAAGA  
GATCCGTGAAGCTTTCAAGGTGTTTGACCGTGACAACAATGNGTGAGTTGG-GCTCTCG-AC--CTG-----GAATTC  
-TATCAATTGTCTGAC-ACCACGTTGACT-----T-TTCCAGGCAAATCATCTCTGCTGAGCATGGCCTCGATGGCTC  
TGGTGTGTAA-----GTA-TT--ACACGA-TTCG-AATGCAGCTACAATCCGACA--A-GATCTGA-TAATCAACAGCTACA  
ATGGCTCCTCCGACCTCCAGTTGGAGCGTATGAACGTTTACTTCAACGAGGTGCGTCG-----AAC-----CAAT  
-CCATTGTAT---AAGGG-A---ACAAA-----GCTCAT-A--CTGG-----TG-TAGGCCTCCGGCAACAAATACGTTCCCGG  
TGCCGTCCTCGTCACTTGGAGCCCGNCCCTCCACCCTTGTC--CTATAC-ACCTGTTGCTTTGGCGGGCCAC  
C-GGGCCACCTGGTCGCCGGGGGAC-G-CACGTCTCCGGGCCCGCGCCCGCCGAAG-CGCTCTGTGAACCCT  
GATGAAGATGG-GCTGTCTGAG-A-CTGTG-AAAATTGTCAAACTTTCAACAATGGATCTCTTGGTTCCGGCATCGA  
TGAAGAACGCAGCGAAATGCGATAAGTAATGTGAATTGCAGAATCCGTGAATCATCGAATCTTTGAACGCACATT  
GCGCCCCCTGGCATTCCGGGGGGCATGCCTGTCCGAGCGTCATTTCTGCCCTCAAGCACGGCTTGTGTGTTGG  
GTGTGGTCCCCC-GGGGACCTGCCCGAAAGGCAGCGGCGACGTCCGTC--GGTCTCGAGCGTATGGGGCTC-  
GTCACTCG-CTCGGGAAGGACCTGCGGGGGTTGGTCA

>Talaromyces\_primulinus\_CBS\_321.48

TT-CATTCTGG-TTGTG-----GCA----ATGTTG---TGGT-GGGTGGTT-AGCTGACCAG-CCG---TTT-----TGATG-A  
GTAGGACAAGGATGGAGATGGTGAAT-----GACCAC-----CGAA--CACCAACG-TTACAGTCAACG-AAT  
AAGGGCTATCTTTATG-ATT-----GGGAACA-GGTATTAA-----TCGTC-GAATAGGTCAAATCACAACCAAGGAAC  
TGGGCACCGTCATGCGTTCCCTCGGCCAGAACCCCTCCGAATCCGAGTTGCAGGACATGATCAACGAAGTGCAG  
GCTGACAACAACGGCACAATCGATTTCCCTGGTATGACTCA-----TCACGTCTATTGCTTGATACGA-----  
--TGGCAG----T-ACTGACCGC--T-G--CAGAATTTTGAACAATGATGGCCCGCAAATGAAGGATACCGACTCCGAG  
GAAGAGATCCGCGAGGCTTTCAAGGTGTTTGACCGCGACAACAATGNGTGAGTCTG-AATCTCG-AC--TCG-----A  
ACTTTG-TACTAATTGTCGCGAC-AATACGCTGACT-----CT-TTCCAGGCAAATCATCTCTGCTGAGCACGGTCTCGA  
CGGCTCTGGTGTGTAA-----GTA-TT--ACGCGA-TTCG-AACCCAGCTACAATTCGACA--A-TATCTGA-TCTTCAAC  
AGCTACAATGGCTCCTCCGACCTCCAGTTGGAGCGTATGAACGTCTACTTCAACGAGGTGCGTCA-----GA  
C-----CACT--TACCAGAT--AAACCG-A---ACGAA-----AACTCAT---ATTT-----TAATAGGCCTCCGGCAACAAATATG  
TCCCCCGTGTCTCCTCGTCACTTGGAGCCCGNCCCTCCACCCTTGCTCT-CTCTAC-ACCTGTTGCTTTGGCG  
GGCCACC-GGGGCCACCGGTGCGCGGGGGAC-G-CTCGTCCCCGGGCCCGCGCCCGCCGAAG-CGCCCTGT  
GAACCCTGATGAAGATGG-GCTGTCTGAGTA-TTATG-AAAATTGTCAAACTTTCAACAATGGATCTCTTGGTTCCG  
GCATCGATGAAGAACGCAGCGAAATGCGATAAGTAATGTGAATTGCAGAATCCGTGAATCATCGAATCTTTGAAC  
GCACATTGCGCCCCCTGGCATTCCGGGGGGCATGCCTGTCCGAGCGTCATTTCTGCCCTCAAGCGCGGCTTGT  
GTGTTGGGTGCGGTCCCCC-GGGGACCTGCCCGAAAGGCAGCGGCGACGTCCGTC--GGTCTCGAGCGTAT  
GGGGCTTTGTCACTCG-CTCGGGAAGGACCTGCGGGGGTTGGTCA

>Talaromyces\_purpurogenus\_CBS\_286.36



TGCAATCATTGT-TTG-----GGT---ATGTTG-----TTGGCCGGTT-ATCTAATTAGCCCG---TTT-----GGATG-AGT  
AGGACAAGGATGGTGTATGGTGTAGT-----TCACCCGGACACGCAGCGATCAACG-ATAAGACTCTGA---  
-----ACAGGATATTTA-----CTATATC-GATTAGGTCAAATCACAACCAAGGAAGTGGGCACCGT  
CATGCGCTCCCTCGGCCAGAACCCCTCCGAATCCGAATTGCAGGACATGATCAACGAAGTTGACGCTGACAACA  
ACGGCACAATCGATTTCCCTGGTATGATGA-----CTCTCGCTACAATC-TACTGCGGATAGG-----TAACTG--  
---ATTGATAAT--GGA---TAGAATCTTGACAATGATGGCCCGAAAATGAAGGATACCGACTCCGAGGAAGAGATC  
CGTGAGGCTTTCAAGGTGTTTGACCGTGACAACAATGNGTGAGGAATGA-----CCA-----CGCTTTC-AGTCAAT  
TGTCGCGAC-GACTCGCTGACT-----AT-TTTCAGGCAAATCATCTCTGCTGAGCACGGTCTCGATGGATCCGGCGT  
GTAA-----GTGTTG--ATGGGA-TTCGAAATCCATCTACAATTCGACC--G-TATCTGA-TAATCAACAGTTACAATGGC  
TCCTCCGACTCCAGTTGGAGCGTATGAACGTTTACTTCAACGAGGTGCGTGC-----AAC-----AA---CCAAC  
CAATAGAAACAAA---ACAAA-----AACTCAT-A--TCCAATGCTTAACAGGCTTCCGGCAACAAATATGTTCTCTGT  
GCTGTCTCGTGCAGTTGGAACCCGGNCCTCCCACCCCTTGTC--CCA-AC-ACCTGTTGCTTCGGCGGGCCACC-  
GGGGCCACCCGGTCGCCGGGGGAC-A-TCCGTCCCCGGGCCCGCGCCCGCCGAGG-CGCTCTGTGAACCCTGA  
TGAAGATGG-GCTGTCTGAGGA--TATG-AAAATTGTCAAACCTTCAACAATGGATCTCTTGGTTCCGGCATCGATG  
AAGAACGCAGCGAAATGCGATAAGTAATGTGAATTGCAGAATTCCGTGAATCATCGAATCTTTGAACGCACATTGC  
GCCCCCTGGCATTCCGGGGGGCATGCCTGTCCGAGCGTCATTTCTGCCCTCAAGCACGGCTTGTGTGTTGGGT  
GTGGTCCC-CC-GGGGACCTGCCGAAAGGCAGCGGCGACGTCCGTC--GGTCCTCGAGCGTATGGGGCTC-GTC  
ACTCG-CTCGGGAAGGACCTGCGGGGGTTGGTCA

>Talaromyces\_ruber\_CBS\_132704

TG-GAAACTTGGTTTGTGTC-----ACA---ATGTTG---GC-----GTGGTT-AGCTGACTAG-CCG---TTT-----TGATG-AA  
TAGGACAAGGATGGAGATGGTGTAGT-----CGC-----CGCGAA--CAATGA-----AACACCTTGA-ACGAAC  
A-----TTACC-GCA-----GTCAACA-GACATTGA-----CCCTATC-GGACAGGACAAATCACAACCAAGGAAGTCCG  
CACAGTCAATGCGTTCTCTCGGCCAGAACCCCTCCGAATCCGAATTGCAGGACATGATCAACGAAGTCGACGCTG  
ACAACAACGGCACAATTGATTTCCCTGGTATGACTGA-----CCACCAAC-TCGCAATATTTGA-----TGG  
CAG---T-ACTGACTGC--C-G---CAGAATTCTTGACAATGATGGCCCGCAAATGAAGGATACCGACTCCGAGGAAG  
AGATCCGTGAGGCTTTCAAGGTGTTTGACCGTGACAACAATGNGTGAGTTTG-A--CTCG-AC--CCA-----AGCTTAC  
-TATCAATTGTGCGAC-AGCACGCTGACT-----A-GACCAGGCAAATCATCTCTGCTGAGCACGGTCTCGATGGCT  
CTGGTGTGTAA-----GTA-TT--TCACAA-TTGG-AATACACCTACAGTTGACG--A-TATCTGA-TCATCGACAGCTAC  
AATGGCTCCTCCGACCTCCAGTTGGAGCGTATGAACGTCTACTTCAACGAGGTGCGTTA-----GAAA----GTC  
TC-TCGACTCCT---ACAG-A--ACAGA-----CACTC-A--TTCA-----TC-TAGGCCCTCCGGCAACAAATATGTCCTC  
GTGCCGTCTCGTGCAGTTGGAGCCCGGNCCTCCCACCCCTTGTC-CTATAC-ACCTGTTGCTTTGGCGGGCCCA  
CC-GGGGTACCTGGTCGCCGGGGGACAA-TCTGTCCCCGGGCCCGCGCCCGCCGAAG-CGCTCTGTGAACCC  
TGATGAAGATGG-GCTGTCTGAGTA-CTATG-AAAATTGTCAAACCTTTCAACAATGGATCTCTTGGTTCCGGCATCG  
ATGAAGAACGCAGCGAAATGCGATAAGTAATGTGAATTGCAGAATTCCGTGAATCATCGAATCTTTGAACGCACAT  
TGCGCCCCCTGGCATTCCGGGGGGCATGCCTGTCCGAGCGTCATTTCTGCCCTCAAGCACGGCTTGTGTGTTG  
GGTGCGGTCCCCC-GGGGACCTGCCGAAAGGCAGCGGCGACGTCCGTC--GGTCCTCGAGCGTATGGGGCT  
TTGTCACTCG-CTCGGGAAGGGCTGCGGGGGTTGGTCA

>Talaromyces\_rubicundus\_CBS\_342.59

TG-GATTTCTTC-TTGTGTC-----GCA---ATG-----TGGT-GGGTGGTT-AGCTGACTAG--CG---GTT-----TAATG-AGT  
AGGACAAGGATGGAGATGGTGTAGT-----TCGC-----CATGAA--CAACGAAC-AAAAGACCTTGC-TCAA  
GG-----TCATT-GCT-----GCGAACA-GATATTGA-----CTATATC-GAATAGGTCAAATCACAACCAAGGAATTGGG  
CACTGTCAATGCGTTCCCTCGGCCAGAATCCCTCCGAATCCGAATTGCAGGACATGATCAACGAAGTCGACGCTG  
ACAACAACGGCACAATCGATTTCCCTGGTATGACGAA-----CCACACTACCAC-TCGCAATATTCCA-----T  
AGCAG---T-ACTAACTGC--T-A---CAGAATTCTTGACAATGATGGCCCGCAAATGAAGGATACCGACTCCGAAGAA

GAGATCCGTGAGGCTTTCAAGGTGTTGATCGTGACAACAATGNGTGAGTTTGAACCTCCCG-AC-CCA-----ACCT  
TTC-CATCAATTGTCGCGAC-AACACGCTGACT-----T-TTCCAGGCAAATCATCTCTGCTGAGCACGGTCTCGACG  
GCTCTGGTGTGTAA-----GTA-TT--AGACCG-TACG-AATCCGACTACAATCCGACA--G-TATCTGA-TTATCAACAG  
CTACAATGGCTCCTCCGACCTCCAGTTGGAGCGTATGAACGTCTACTTCAACGAGGTGCGTTA-----GAAA--  
---ACAT-TCGACTCAT---GCAG-A---ACAAA-----ACACTC--ATTG----GTATAGGCCTCCGGAAACAAATATGTCC  
CCCGTGTCTCCTCGTCTGACTTAGAGCCCGGNCCTCCCACCCTTGTGCT--CTATA--ACCTGTTGCTTTGGCGGGCC  
CACC-GTGA-----GGTCGCCGGGGGAC-G-AACGTCCCCGGGCCCGCCCGCCGAAG-CGCCCTGTGAACCCTG  
ATGAAGATGG-GCTGTCTGAG---GTACG-AAAATCGTCAAACTTTCAACAATGGATCTCTTGGTTCCGGCATCGAT  
GAAGAACGCAGCGAAATGCGATAAGTAATGTGAATTGCAGAATCCGTGAATCATCGAATCTTTGAACGCACATTG  
CGCCCCCTGGCATTCCGGGGGGCATGCCTGTCCGAGCGTCATTTCTGCCCTCAAGCACGGCTTGTGTGTTGGG  
TGTGGTCCCCC-GGGGACCTGCCGAAAGGCAGCGGCGACGTCCGTC--GGTCCTCGAGCGTATGGGGCTC-G  
TCACTCG-CTCGGAAGGACCTGCGGGGGTTGGTCA

>Talaromyces\_sayulitensis\_CBS\_138204

TG-CAAATCTGG-TTCTC-----GCA---ATGTTG---TGGT-GGGTGGT-AGCTGACTAG-CCG---TTT-----TGATG-  
AGTAGGACAAGGATGGAGATGGTGAGC-----CCGC-----CACGAA--CAATAACC-AAAAAGCCTTGA-AC  
AAAGG-----TTGGT-TC-----GCGAACA-AATATTGA-----TATGCTTGAATAGGCCAGATCACAACCAAGGA  
GGGCACCGTCATGCGTTCTCTCGGCCAGAACCCTCCGAATCCGAATGCAGGACATGATCAATGAAGTGGACG  
CTGACAACAACGGCACAATCGATTTTCTGGTATGATATA-----ATTGCTCACGGAT-TATTA----CGA-----T  
GGCAG---T-ACTAATTGC--C-G---CAGAATTCTTGACAATGATGGCACGAAAATGAAGGATACCGACTCGGAAGAA  
GAGATCCGTGAGGCTTTCAAGGTGTTTGACCGTGACAACAATGNGTGAGTTGG-ACTCTCG-AC--TCG-----GACT  
TTC-TATCAATTGTCGCGAC-AACACGCTGACT-----T-TCCCAGGCAAATCATCTCTGCTGAGCACGGTCTCGATGG  
CTCTGGTGTGTAA-----GTA-TT--GCACGATTTG-AATCCGGCTACAATCCGACG--A-TATCTGA-TAATCAACAGC  
TACAATGGCTCCTCCGACCTCCAGTTGGAGCGTATGAACGTCTATTTCAACGAGGTGTGTCG-----AAC-----  
CAAT-CCATCGTAT---AACGG-A---ACAAT-----ACTTAT---ATTA-----GTATAGGCCTCCGGCAACAAATACGTTCCC  
CGTGTCTCCTCGTCTGACTTGAACCCGGNCCTCCCACCCTTGTCTCTAATAC-ACCTGTTGCTTTGGCGGGGCC  
ACC-GGGGCCACCTGGTCGCCGGGGGAC-G-CACGTCCCCGGGCCCGCCCGCCGAAG-CGCTCTGTGAACC  
CTGATGAAGATGG-GCTGTCTGAGTA-CTGTGAAAAATTGTCAAACTTTCAACAATGGATCTCTTGGTTCCGGCAT  
CGATGAAGAACGCAGCGAAATGCGATAAGTAATGTGAATTGCAGAATCCGTGAATCATCGAATCTTTGAACGCAC  
ATTGCGCCCCCTGGCATTCCGGGGGGCATGCCTGTCCGAGCGTCATTTCTGCCCTCAAGCACGGCTTGTGTGTT  
GGGTGTGGTCCCCC-GGGGACCTGCCGAAAGGCAGCGGCGACGTCCGTC--GGTCCTCGAGCGTATGGGGC  
TCTGTCACTCG-CTCGGAAGGACCTGCGGGGGTTGGTCA

>Talaromyces\_siamensis\_CBS\_475.88

TG-ACTTTCTAC-TTATC-----GCA---ATGTTG---TGGT--GGTGGT-AGCTGACTAG-CCG---GTT-----TGATG-AA  
TAGGACAAGGATGGAGATGGTGAGT-----CGCCACGAACACAAA--CAACAACC-AAACGACTTTGA-A  
CAAAGG-----CTATC---A-----ACGGACA-GTTATTGA-----CTCTATC-GAATAGGTCAAATCACAACCAAGGA  
GGGCACCGTCATGCGTTCCCTCGGCCAGAACCCTCCGAATCCGAATGCAGGACATGATCAACGAGGTGCGAC  
GCTGACAACAACGGCACAATCGATTTTCTGGTATGACAAA-----GCACACAACACTAC-TCGCAATATTCCA-----  
----TGCCAG---T-ACTAAGTGC--T-G---CAGAATTCCTGACAATGATGGCCCGAAAATGAAGGATACCGACTCCGA  
GGAAGAGATCCGCGAGGCCTTCAAGGTGTTTGATCGTGACAACAATGNGTGAGTTTG-A--CTCG-AC--CCA-----A  
ACTTTC-TATCAATTGTCGCGAC-AACACGCTGACT-----T-TTCCAGGCAAATCATCTCTGCTGAGCACGGTCTCGA  
TGGCTCTGGTGTGTAA-----GTA-TT--CACGACCTCG-AATCCAGCTACAATCCGACA--A-TATCTGA-TCGTCAAC  
AGCTACAATGGCTCCTCCGACCTCCAGTTGGAGCGTATGAACGTCTACTTCAACGAGGTGCGTCG-----TA  
C-----CAAT-CCACCATAT--GACGA-A---ACAAA-----CTTAC-A--ATGG-----TATTAGGCCTCCGGCAACAAATACG  
TCCCCCGTGTCTCCTCGTCTGACTTGGAGCCCGGNCCTCCCACCCTTGTGCT--CTATAC-ACCCGTTGCTTTGGCG

GGCCACC-GGGGCCACCTGGTCGCCGGGGAC-G-TCCGTCCCCGGGCCCGCGCCCGCCGAAG-CGCTCTGT  
GAACCCTGATGAAGATGG-GCTGTCTGAG-A-CTATG-AAAATTGTCAAACCTTTCAACAATGGATCTCTTGGTTCCG  
GCATCGATGAAGAACGCAGCGAAATGCGATAAGTAATGTGAATTGCAGAATTCCGTGAATCATCGAATCTTTGAAC  
GCACATTGCGCCCCCTGGCATTCCGGGGGGCATGCCTGTCCGAGCGTCATTTCTGCCCTCAAGCACGGCTTGT  
GTGTTGGGTGCGGTCCCCC-GGGGACCTGCCGAAAGGCAGCGGCGACGTCCGTC--GGTCCTCGAGCGTATG  
GGGCTC-GTCACTCG-CTCGGGAAGGACCTGCGGGGGTTGGTCA

>Talaromyces\_stollii\_CBS\_408.93

TG-GATTCTTG-TTGTG-----GCA----ATGCTA---GCGT-GGGTGGTT-TGCTGACGAG-CCG---TCT-----TGATG-  
AGTAGGACAAGGATGGAGATGGTGAGT-----CGC----CGCGAA--CAATGA----AGCTGCTTGA-ACGA  
AT-----CA-----GCCAACA-GACCTTAA-----CTCTATC-GAACAGGACAAATCACAACCAAGGAACCTGGCA  
CCGTCATGCGTTCCCTCGGCCAGAACCCCTCCGAATCCGAATTGCAGGACATGATCAACGAAGTCGACGCTGAT  
AACAACGGCACAATCGATTCCCTGGTATGATAGA-----CCACCAGC-TCGCACTTTTTGA-----TGCA  
G----C-ACTAACTGC--C-G---CAGAATTTTGACAATGATGGCCCGCAAATGAAGGATACCGACTCCGAGGAAGAG  
ATCCGTGAGGCTTTCAAGGTGTTTGACCGTGATAACAATGNGTGAGTTTG-A--CTCG-AC--CCA-----AACTTC-TA  
TCAATTGTCGCGGC-GGCACGCTGACT-----T-GTCCAGGCAAATTATCTCTGCTGAGCACGGTCTCGATGGCTCT  
GGTGTGTAA-----GTA-TT--TCACAA-TTCG-AATACACCCACAGTCCGAGG--T-TATCTGA-TCATCGACAGCTACAA  
TGGCTCCTCCGACCTCCAGTTGGAGCGTATGAACGTCTACTTCAACGAGGTGCGTTT-----GAAA----GTTTC  
-TCGACTCCT---GCAG-A---ACAAA-----CACTA-A--TTCA----GC-TAGGCCTCCGGCAACAAATACGTCCCCCG  
TGCTGTCTCGTCACTTGGAGCCCGGNCCTCCCACCCTTGTCT-CTATAC-ACCTGTTGCTTTGGCGGGCCAC  
C-GGGGCCACCTGGTCGCCGGGGGAC-G-TTCGTCCCCGGGCCCGCGCCCGCCGAAG-CGCTCTGTGAACCCT  
GATGAAGATGG-GCTGTCTGAGTA-CTATG-AAAATTGTCAAACCTTTCAACAATGGATCTCTTGGTTCCGGCATCGA  
TGAAGAACGCAGCGAAATGCGATAAGTAATGTGAATTGCAGAATTCCGTGAATCATCGAATCTTTGAACGCACATT  
GCGCCCCCTGGCATTCCGGGGGGCATGCCTGTCCGAGCGTCATTTCTGCCCTCAAGCACGGCTTGTGTGTTGG  
GTGCGGTCCCCC-GGGGGCCTGCCGAAAGGCAGCGGCGACGTCCGTCT-GGTCTCGAGCGTATGGGGCTT  
TGCTCACTCG-CTCGGGAAGGACTGGCGGGGGTTGGTCA

>Talaromyces\_thailandensis\_CBS\_133147

TG-GGTTTCCGG-TTGTG-----GCA----ATGTTG---TGGCTGGGTGGTT-AGCTGACTAG-CCG---TTT-----TGATG  
-AATAGGACAAGGATGGAGATGGTGAGT-----GAGCCGC-----AATGAT--CACCAACG-ATGCAATCTTTG-  
GACAAGA-----ATATC-AGC-----ACGAACAGTATCCTGA-----CTATATCTGAATAGGTCAAATCACAACCAAGGA  
ACTGGGACCGTATGCGTTCCCTCGGCCAGAACCCCTCCGAATCCGAGCTGCAGGACATGATCAACGAAGTC  
GACGCTGACAACAACGGCACAATCGATTTCCCTGGTATGAAACA-----ATTGCTTACGGGC-G-----TTACGA----  
-----TGGCAG----AACTAACTGC--CTA---CAGAATCTTGACAATGATGGCCCGCAAATGAAGGATACCGACTCC  
GAGGAAGAGATCCGTGAGGCTTTCAAGGTGTTTGATCGCGACAACAATGNGTGAGTGTGACTCTCG-AC--CCA--  
----AACTTC-GGTCAATTCTCGCGAC-AACACGCTGACT-----CTTCCAGGCAAATCATCTCCGCTGAGCACGGTC  
TCGACGGCTCTGGTGTGTAA-----GTG-TT-GATACGA-ATCGAAATC---CACAATTCGACA--A-TATCTGA-TAATC  
AACAGCTACAATGGCTCCTCCGACCTCCAGTTGGAGCGTATGAACGTTTACTTCAACGAGGTGAGTTA-----  
-GAC-----AACACTCGACTCGAACAGAA--CACAGA-----CTCATCA--ATTG-----CA-TAGGCTTCCGGCAACAA  
GTATGTCCCTCGTGTCTGCTCGTCACTTGGAGCCCGGNCCTCCCACCCTTGTCT-CTATAC-ACCTGTTGCTTT  
GGCGGGCCACC-GGGGCCACCCGGTCGCCGGGGGAC-G-CTCGTCCCCGGGCCCGCGCCCGCCGAAG-CGC  
TCTAAGAACCCTGATGAAGATGG-GCTGTCTGAGTA-CTATG-AAAATTGTCAAACCTTTCAACAATGGATCTCTTGG  
TTCCGGCATCGATGAAGAACGCAGCGAAATGCGATAAGTAATGTGAATTGCAGAATTCCGTGAATCATCGAATCTT  
TGAACGCACATTGCGCCCCCTGGCATTCCGGGGGGCATGCCTGTCCGAGCGTCATTTCTGCCCTCAAGCACGG  
CTTGTGTGTTGGGTGTGGTCCCCC-GGGGACCTGCCGAAAGGCAGCGGCGACGTCCGTCT-GGTCTCGAG  
CGTATGGGGCTTTGCTCACTCG-CTCGGGAAGGACCTGCGGGGGTTGGTCA

>Talaromyces\_verruculosus\_CBS\_388.48

TG-AATTTCTGG-TTATC-----GCA----ATGTTG---TGGT-GGGTAGTT-AGCTGACTAG-CCG---TTT-----TGTTG-A  
GTAGGACAAGGATGGAGATGGTGAAGT-----GACCGC----CACCAA--CACCGACG-ATCTAGTCTCGA-AC  
AAAGG-----CTATT-TGT-----ACGATCA-GATATTGA-----CGATATCTGAATAGGTCAAATCACAACCAAGGAACT  
GGGCACTGTCATGCGTTCCCTCGGCCAGAACCCTCCGAATCCGAATTGCAGGACATGATCAACGAGGTTGACG  
CTGACAACAACGGCACAATCGATTTCCCTGGTATGACATAACCTAT-----CAACCGCAAACATATATGACAGTTGGA--  
-----TGGCAG----A-ACTAACTGC--C-A---CAGAATTCTTGACAATGATGGCTCGCAAAATGAAGGATACCGACTCC  
GAGGAAGAGATCCGTGAGGCTTTCAAGGTGTTTGACCGCGACAACAATGNGTGAGTTTG-ACTCTGG-AA-CCC---  
---AACTTTC-GATCAATTGTTGCGAC-AGCACACTGACT-----C-TTTCAGGCAAATCATCTCTGCTGAGCACGGTCT  
CGACGGCTCCGGTGTGTAA-----GTA-TA--ACACGA-TTCG-AATCCAGCTGCAGTCCGACG--A-TATCTGA-TGAT  
CAACAGCTACAATGGCTCCTCCGACCTCCAGTTGGAGCGTATGAACGTCTACTTCAACGAGGTGCGTCA-----  
---GAC-----CAAT-CCACTAGAT--AAATCG-A---ACAAA-----ACTCATCC--CTCG-----ATAGGCTTCCGGCAACAA  
ATATGTCCCCCGTGTCTCCTCGTGCAGTTGGAGCCCGGNCCTCCCACCCTTGTCT-CTATAC-ACCTGTTGCTTT  
GGCGGGCCACC-GGGGCCACCTGGTCGCCGGGGGAC-G--TCGTCTCCGGGCCCGCGCCCGCCGAAG-CGCT  
CTGTGAACCCTGATGAAGATGG-GCTGTCTGAGTA-CTATG-AAAATTGTCAAAACTTTCAACAATGGATCTCTTGGT  
TCCGGCATCGATGAAGAACGCAGCGAAATGCGATAAGTAATGTGAATTGCAGAATCCGTGAATCATCGAATCTTT  
GAACGCACATTGCGCCCCCTGGCATTCCGGGGGGCATGCCTGTCCGAGCGTCATTTCTGCCCTCAAGCACGGC  
TTGTGTGTTGGGTGCGGTCCCCC-GGGGACCTGCCGAAAGGCAGCGGGCAGCGTCCGTCT-GGTCTCGAGC  
GTATGGGGCTCTGTCACTCG-CTCGGGACGGACCTGCGGGGGTTGGTCA

>Talaromyces\_viridis\_CBS\_114.72

TG-TATTTCTTG-TTGTG-----GCA----ATGTTG---TGGT-GGGTGGTT-AGCTGACTAG-TCG---TTT-----TGATG-A  
GTAGGACAAGGATGGAGATGGTGAAGT-----CAACCGC----CACG-----CAACG-ATACAATCTTTG-AACA  
AAATCTACTATTGTA-ATT-----ACGAACAAAATATTGA-----CCATATCTGAAAAGGTCAAATCACAACCAAGGAAC  
TGGGCACCGTCATGCGTTCCCTCGGCCAGAACCCTCCGAATCCGAATTGCAGGACATGATCAACGAAGTCGAC  
GCTGACAACAACGGCACAATCGATTTCCCTGGTATGACAGA-----CACACTACAAC-GCACAATCGTCTA-----  
----TGGCAG----AACTAACTGC--CGA---TAGAATTCTTGWCAATGATGGCCCGCAAAATGAAGGATACCGACTCCG  
AGGAAGAGATCCGTGAGGCTTTCAAGGTGTTTGACCGTGACAACAATGNGTGAGTTTG-ACTCTGAGAC--CGA----  
--AACTCTCAGTCAAATTGTT-----TGACT-----CT-TTCCAGGCAAATCATCTCTGCTGAGCACGGCCTCGATGG  
CTCCGGTGTGTAA-----GTA-TTTGACTTGG-TTCG-AATCCAGCTACAATCCGACA--A-TCTCTGA-TCATCAACAG  
TTACAATGGCTCCTCCGACCTCCAGTTGGAGCGTATGAACGTTTACTTCAACGAGGTGCGTTA-----GAAAA  
CAAGACAT-TCGACTCA----ACCGGA---CAAAG-----ACTCATCA--GTTG----GTTTAGGCTTCCGGCAACAAATA  
TGTTCCCTCGTGTCTGTTCTCGTGCAGTTGGAGCCCGGNTCTCCCACCCTTGTCT-CTCTAT-ACCTGTTGCTTCGGC  
GGGCCACC-GGGACA--CTGGTCGCCGGGGGAC-G-TCCGTCCCCGGGCCCGCGCCCGCCGAAGCCCCCTGT  
GAACCCTGATGAATATGGAGCTGTCTGAGTATCAATG-AAAATCGTCAAAACTTTCAACAATGGATCTCTTGGTTCC  
GGCATCGATGAAGAACGCAGCGAAATGCGATAAGTAATGTGAATTGCAGAATCCGTGAATCATCGAATCTTTGAA  
CGCACATTGCGCCCCCTGGCATTCCGGGGGGCATGCCTGTCCGAGCGTCATTTCTGCCCTCAAGCGCGGCTTG  
TGTGTTGGGTGCGGTCCCCC-GGGGACCCGCCGAAAGGCAGCGGGCAGCGCCGTC--GGTCTCGAGCGC  
ATGGGGCTCTGTCAACCG-CTCGGGAAGGACCCGCGGGGGTTGGTCA

>Talaromyces\_viridulus\_CBS\_252.87

TG-GATTTCTGG-TTGTG-----GCA----ATGTTG---TGT-GGGTAGTT-AGCTGACGAG-CCG---TTT-----TGATG-A  
GTAGGACAAGGATGGAGATGGTGAAGT-----GACCAC----CACAAA--CACCGCG-ATATGGTCTTGA-AC  
CGAGG-----TTATT-ACT-----ACGAACA-TATATTGA-----CGGTATTTGAACAGGTCAAATCACAACCAAGGAACT  
GGGCACCGTCATGCGTTCCCTCGGCCAGAACCCTCTGAATCCGAATTGCAGGACATGATCAACGAGGTGCGACG  
CTGACAACAACGGCACAATCGATTTCCCTGGTATGACCA-----ACACGTCT-ACGCTGAACACGA-----

-TGGCGG----T-ACTAACTGC--C-A---CAGAATCTTGACAATGATGGCCCGCAAATGAAGGATACCGACTCCGAGG  
AAGAGATCCGCGAGGCTTTCAAGGTGTTTGACCGCGACAACAATGNGTGAGTTG--GTCTCG-AC--CCA-----AAC  
TTTC-TATCAATTGTCGCAAC-AACACGCTGACT-----C-TTTCAGGCAAATCATCTCTGCTGAGCACGGTCTCGACG  
GCTCTGGTGTGTAA-----GTA-TC--GCACGA-TTCG-AATCCAGCTACAACCCGACA--A-TATCTGA-CAATCAACAG  
CTACAATGGCTCCTCCGACCTCCAGTTGGAGCGTATGAACGTTTACTTCAACGAGGT---CA-----GAC-----C  
ACT-CCACCAGAT--AAATCG-A---ACAAA-----ACTCAT-A--ATTG----GTATAGGCCTCCGGCAACAAATATGTCCC  
TCGTGCTATCCTCGTGCAGTTGGAGCCCGGNCCTCCCACCCTTGCT-CTATAC-ACCTGTTGCTTTGGCGGGCCC  
ACC-GGGGCCACCTGGTGC CGGGGGGAC-G-TTCGTCCCCGGGCCCGCGCCCGCGAAG-CGCCCTGTGAACC  
CTGATGAAGATGG-GCTGTCTGAGTA-CGATG-AAAATTGTCAAACTTTCAACAATGGATCTCTTGGTCCGGCAT  
CGATGAAGAACGCAGCGAAATGCGATAAGTAATGTGAATTGCAGAATCCGTGAATCATCGAATCTTTGAACGCAC  
ATTGCGCCCCCTGGCATTCCGGGGGGCATGCCTGTCCGAGCGTCATTTCTGCCCTCAAGCACGGCTTGTGTGT  
GGGTGTGGTCCCCC-GGGGACCTGCCGAAAGGCAGCGGCGACGTCCGTGCG-GGTCCTCGAGCGCATGGGG  
CTTTGTCACTCG-CTCGGGAAGGACCTGCGGGGGTTGGTCA

>Talaromyces\_qii\_AS3.15414

TG-GGTTTCCGG-TTGTG-----GCA----ATGTTG--TGGC-GGGTGGTT-AGCTGACTCG-CCG---TTT-----TGATG-  
AGTAGGACAAGGATGGAGATGGTGAGT-----GAGCCGC----AATGAT--CACCAACG-ATGCAGTCTTTG-  
GACGAGT-----AAATC-AGC-----ACGAACAGTATCCTGA-----CTATATCTGAATAGGTCAAATCACAACCAAGGA  
ACTGGGCACCGTATGCGTTCCTCGGCCAGAACCCCTCCGAATCCGAACTGCAGGACATGATCAACGAAGTGC  
ACGCTGACAACAACGGCACAATCGATTTCCCTGGTATGACACA-----ATCATCTTACGGT-CGCTA----CGA-----  
-----TGGCAG---AGACTAACTGC--CTA---CAGAATCTGACAATGATGGCCCGCAAATGAAGGATACCGACTCCG  
AGGAAGAGATCCGTGAGGCTTTCAAGGTGTTTGACCGCGACAACAATGNGTGAGTGTGACTCTCG-AC--CCA---  
--AACTTTC-AGTCAATTCTCGCGAC-AACACGCTGACT-----CT-TTCCAGGCAAATCATCTCCGCTGAGCACGGTCT  
CGACGGCTCTGGTGTGTAA-----GTG-TT-GATACGA-ATCGAAATCC--TACAATTCGACA--C-TATCTGA-TAATCA  
ACAGCTACAATGGCTCCTCCGACCTCCAGTTGGAGCGTATGAACGTTTACTTCAACGAGGTGCGTTA-----  
GAA-----TCACTCGACTCAAACGAAA--CACAGA-----CTCATCA--ATTG----CA-TAGGCTCCGGCAACAAGT  
ATGTCCCTCGTGCTGTCTCGTGCATTTGGAGCCCGGNCCTCCCACCCTTGCT-CTATAT-ACCTGTTGCTTTGG  
CGGGCCCACC-GGGGCCACCCGGTCCGCCGGGGGAC-G-CTCGTCCCCGGGCCCGCGCCCGCGAAG-CGCTCT  
AAGAACCCTGATGAAGATGG-GCTGTCTGAGTA-ATTTG-AAAATTGTCAAACTTTCAACAATGGATCTCTTGGTTC  
CGGCATCGATGAAGAACGCAGCGAAATGCGATAAGTAATGTGAATTGCAGAATCCGTGAATCATCGAATCTTTGA  
ACGCACATTGCGCCCCCTGGCATTCCGGGGGGCATGCCTGTCCGAGCGTCATTTCTGCCCTCAAGCACGGCTT  
GTGTGTTGGGTGTGGTCCCTCC-GGGGACCTGCCGAAAGGCAGCGGCGACGTCCGTCT-GGTCCTCGAGCGTA  
TGGGGCTCTGTCACTCG-CTCGGGAAGGACCTGCGGGGGTTGGTCA

>Talaromyces\_fusisporus\_AS3.15415

TG-GATTCTGG-TTGTGCGTGTGTGTGCA---ATGCTA---TAGC-GGGCGGT-AGCTGACTAG-CCG---TTT-----T  
GATG-AATAGGACAAGGATGGAGATGGTGAGT-----TTCTTACGAACACGAA--CGACAACG-ATACGATT  
TTTG-GAGAATA-----TTATG-ACT-----ACGAACAACATATTGA-----TAAAGTC-CAATAGGTCAGATCACAACCAA  
GGAACCTGGGCACCGTATGCGTTCCTCGGCCAGAACCCCTCCGAATCTGAATTGCAGGACATGATCAACGAAG  
TCGACGCTGACAACAACGGCACAATCGATTTCCCTGGTATGACAGT-----ACACAAAATTGCAATTTTTGGA  
-----GGGCAG---T-ACTAACTGC--C-G---CAGAATCTTGACAATGATGGCCCGCAAATGAAGGATACCGACTC  
CGAGGAAGAAATCCGTGAGGCTTTCAAGGTGTTTGACCGTGACAACAATGNGTGAGTTGG-A--CACG-AC--CCA---  
---AACTTTC-TATCAATTGTCGCGAC-AGCACGCTGACT-----TGTCAGGCAAATCATCTCTGCTGAGCACGGTCTC  
GATGGCTCTGGTGTGTAA-----GTA-TT--ATACGA-TTCG-AATCCAGCTACAATCCGACA--G-TATCTGA-TCATCAA  
CAGCTACAATGGCTCCTCCGACCTCCAGTTGGAGCGTATGAACGTCTACTTCAACGAGGTGCGTTA-----G  
GAT-----TTCC-TCGGCTCAT---GCAG-A---ACAAA-----CACTCAT---ATGA-----ATAGGCCTCCGGCAACAAATAC

GTCCCCGTGCTGTCTCGTCTGACTTGGAGCCCGGNCCTCCCACCCTTGTCT-CTATAC-ACCTGTTGCTTTGGC  
GGGCCACCGGGGCTCACCTGGTCGCCGGGGAC-G-TCTGTCCCCGGGCCCGCGCCCGCCAAG-CGCTCTG  
AGAACCCTGATGAAGATGG-GCTGTCTGAGTA-CTATG-AAAATTGTCAAACTTTCAACAATGGATCTCTTGGTTCC  
GGCATCGATGAAGAACGCAGCGAAATGCGATAAGTAATGTGAATTGCAGAATCCCGTGAATCATCGAATCTTTGAA  
CGCACATTGCGCCCCCTGGCATTCCGGGGGGCATGCCTGTCCGAGCGTCATTTCTGCCCTCAAGCGCGGCTTG  
TGTGTTGGGTGCGGTCCCCC-GGGGACCTGCCGAAAGGCAGCGGCGACGTCCGTTTGGGTCTCGAGCGTA  
TGGGGCTTTGTCACTCG-CTCGGGACGGACCCGCGGGGGTTGGTCA

>Talaromyces\_helicus\_CBS\_335.48

TG-ACGGTTTGA-----GCA----AGAATT-----GTGTGGC--AGCAATCTAA--TA---TTTTGATCTTGATGATG-TAC  
AGGACAAAGATGGCGATGGTGTGATTTGTGCGAGAGCATTACTCCGAATTGCAGATAAGCAAT--CAACGAAGAAAA  
AAGGGTTCG-ACATGGACACAAACCTGTG-----GAATACTGTACTAAAAGCGTGATCGACGTT-GGCCAGGTC  
AAATCACAACCAAAGAAGTACCGTACCGTTCATGCGCTCTCTCGGCCAGAACCCTTCCGAATCCGAATTGCAGGACA  
TGATCAACGAAGTGCAGCGTGATAACAACGGCACAATTGACTTTCCTGGTATGATCAA-----AATCCGTCCTCA  
C-TCCCCTGTTTTGCCAGCTCCCCCTCGCAGTG--TGATTAATAGAAAGGGTATTAGAATTCTTGACCATGATGG  
CTCGCAAAATGAAGGATACCGACTCCGAAGAAGAAATCCGCGAGGCATTCAAGGTGTTTGACCGCGACAACAAT  
GNGTCCATCAT-ATTCTTG-TT-----CCCTC-TGCTAATCGTCATAAC-----CAGGCAAATCATCTCT  
GCTGAGCACGGCCTCGATGGCTCTGGTGTGTAAGTTGACCGTGTATT--TGTCGACGTGAAATCTATCATCGAT  
CGCTCA--G-ATTCTGACCAACCAGCTACAATGGCTCCTCCGACCTTCAATTGGAGCGCATGAACGTCTACTTC  
AACGAGGTACGCCAATCCATCTAAGGCCTACACGCATTCAAT-CCAATAACGCGAGAAAAA---AAAAA-----  
-----TCTTAGGCCAACGGCAACAAATATGTTCCCTCGTGTCTCGTCTCGATCTCGAGCCCCGGNCCTCCCAC  
CCGTGCCGTTATAAT-ACCTGTTGCTTTGGCGGGCCAC--GGGG-CACCTGGTCGCTGGGGGAC-G--CCGTCCCC  
GGGCCCGCGCCCGCCAAG-CACCCCCTGAACCTCTGAAGAAGATAGGGCTGTCTGAG-A-CCTAG-AAAATTGTCA  
AACTTTCAACAATGGATCTCTTGGTTCCGGCATCGATGAAGAACGCAGCGAAATGCGATAAGTAATGTGAATTGC  
AGAATTCCGTGAATCATCGAATCTTTGAACGCACATTGCGCCCCCTGGCATTCCGGGGGGCATGCCTGTCCGAG  
CGTCATTTCTGCCCTCAAGCACGGCTTGTGTGTTGGGTGTGGTCCCCCGGGGACCTGCCCAAAGGCAGCG  
GCGACGCCCGTCG-GGTCTCGAGCGCATGGGGCTT-GTCACTTG-CTCGGGAGGGACCTGCGGGGGTTGGTCA

Data S4. The sequence alignment of combined *CaM*, *BenA* and *ITS1-5.8S-ITS2*.
